# Supplementary material for: The proportions of term or late preterm births after exposure to early antenatal corticosteroids, and outcomes: systematic review and meta-analysis of 1.6 million infants
Source: PubMed Central journal article supplement — BMJ. 2023 Aug 2;382:e076035. doi: 10.1136/bmj-2023-076035 (PMC10394681; doi:10.1136/bmj-2023-076035), 2023-08-02
Supplement: nink076035.ww.pdf [file nink076035.ww.pdf]

The proportions of term or late preterm births after early exposure to antenatal corticosteroids and outcomes:  
systematic review and meta-analysis of 1.6 million infants

Data Supplement:

|                                                                                                                                                                                                                                                                                                                                         |    |
|-----------------------------------------------------------------------------------------------------------------------------------------------------------------------------------------------------------------------------------------------------------------------------------------------------------------------------------------|----|
| eTable 1: <u>Newcastle-Ottawa Scale assessments</u> of primary and secondary outcomes within included <u>population-based cohort studies</u> in a systematic review and meta-analysis on term, late preterm, and term/late preterm births after early exposure to antenatal corticosteroids .....                                       | 2  |
| eFigure 1: <u>Adjusted and unadjusted</u> analyses of secondary outcomes for infants born at <u>term</u> from population-based studies in a systematic review and meta-analysis on term, late preterm, and term/late preterm births after early exposure to antenatal corticosteroids.....                                              | 7  |
| eFigure 2: Pooled secondary outcomes for infants born at <u>term</u> from population-based studies in a systematic review and meta-analysis on term, late preterm, and term/late preterm births after early exposure to antenatal corticosteroids .....                                                                                 | 13 |
| eFigure 3: <u>Adjusted and unadjusted</u> analyses of secondary outcomes for infants born <u>late preterm</u> from population-based studies in a systematic review and meta-analysis on term, late preterm, and term/late preterm births after early exposure to antenatal corticosteroids .....                                        | 19 |
| eFigure 4: Pooled secondary outcomes for infants born <u>late preterm</u> from population-based studies in a systematic review and meta-analysis on term, late preterm, and term/late preterm births after early exposure to antenatal corticosteroids .....                                                                            | 21 |
| eFigure 5: <u>Adjusted and unadjusted</u> analyses of secondary outcomes for infants born at <u>term/late preterm</u> (combined) from population-based studies in a systematic review and meta-analysis on term, late preterm, and term/late preterm births after early exposure to antenatal corticosteroids (a post-hoc analysis).... | 23 |
| eFigure 6: Available subgroup data for infant sex in infants born at <u>term</u> , or <u>term/late preterm</u> (combined) from a population-based study in a systematic review and meta-analysis on term, late preterm, and term/late preterm births after early exposure to antenatal corticosteroids .....                            | 26 |
| eAppendix 1: <u>Electronic search strategies</u> for a systematic review and meta-analysis on term, late preterm, and term/late preterm births after early exposure to antenatal corticosteroids .....                                                                                                                                  | 30 |
| eAppendix 2: <u>Excluded studies</u> from a systematic review and meta-analysis on term, late preterm, and term/late preterm births after early exposure to antenatal corticosteroids .....                                                                                                                                             | 40 |
| eAppendix 3: <u>List of pre-specified outcomes</u> in a systematic review and meta-analysis on term, late preterm, and term/late preterm births after early exposure to antenatal corticosteroids .....                                                                                                                                 | 65 |
| eAppendix 4: <u>Confounders/co-variates</u> for adjusted and proportion analyses addressed within included population-based studies and randomized studies in a systematic review and meta-analysis on term, late preterm, and term/late preterm births after early exposure to antenatal corticosteroids .....                         | 67 |
| eReferences .....                                                                                                                                                                                                                                                                                                                       | 79 |

**eTable 1: Newcastle-Ottawa Scale assessments of primary and secondary outcomes within included population-based cohort studies in a systematic review and meta-analysis on term, late preterm, and term/late preterm births after early exposure to antenatal corticosteroids**

| <b>Infants born at term</b>                                                                                              |                                   |                         |              |              |              |                           |                |              |              |
|--------------------------------------------------------------------------------------------------------------------------|-----------------------------------|-------------------------|--------------|--------------|--------------|---------------------------|----------------|--------------|--------------|
| <b>Short-term outcomes:</b>                                                                                              |                                   |                         |              |              |              |                           |                |              |              |
| <b>Study, Year (Country)<br/>Outcome(s)</b>                                                                              | <b>Total score<br/>(max: 12★)</b> | <b>Component scores</b> |              |              |              |                           |                |              |              |
|                                                                                                                          |                                   | <b>Selection</b>        |              |              |              | <b>Comparability</b>      | <b>Outcome</b> |              |              |
|                                                                                                                          |                                   | Q1<br>max:1★            | Q2<br>max:1★ | Q3<br>max:1★ | Q4<br>max:1★ | Q1 <sup>a</sup><br>max:5★ | Q1<br>max:1★   | Q2<br>max:1★ | Q3<br>max:1★ |
| <b>Adjusted analyses:</b>                                                                                                |                                   |                         |              |              |              |                           |                |              |              |
| <b>Diguisto, 2020 (France)<sup>1</sup></b><br>Birth length <5 <sup>th</sup> percentile<br>BW <5 <sup>th</sup> percentile | 10★★★★★★★★★                       | ★                       | ★            | ★            | ★            | ★★★★☆                     | ★              | ★            | ★            |
| <b>Diguisto, 2020 (France)<sup>1</sup></b><br>HC <5 <sup>th</sup> percentile                                             | 9★★★★★★★★★                        | ★                       | ★            | ★            | ★            | ★★★★☆                     | ★              | ★            | ☆            |
| <b>McKinzie, 2021 (U.S.A)<sup>2</sup></b><br>All included outcomes                                                       | 8★★★★★★★★★                        | ☆                       | ★            | ★            | ★            | ★★★★☆                     | ★              | ★            | ★            |
| <b>Rodriguez, 2019 (Finland)<sup>3</sup></b><br>All included outcomes                                                    | 7★★★★★★★★★                        | ☆                       | ★            | ★            | ★            | ★★☆☆☆                     | ★              | ★            | ★            |
| <b>Unadjusted analyses:</b>                                                                                              |                                   |                         |              |              |              |                           |                |              |              |
| <b>Diguisto, 2020 (France)<sup>1</sup></b><br>BW <5 <sup>th</sup> percentile<br>Birth length <5 <sup>th</sup> percentile | 8★★★★★★★★★                        | ★                       | ★            | ★            | ★            | ★★☆☆☆                     | ★              | ★            | ★            |
| <b>Melamed, 2019 (Canada)<sup>4</sup></b><br>All included outcomes                                                       | 8★★★★★★★★★                        | ☆                       | ★            | ★            | ★            | ★★★★☆                     | ★              | ★            | ★            |
| <b>Raikkonen, 2022 (Finland)<sup>5</sup></b><br>All included outcomes                                                    | 7★★★★★★★★★                        | ☆                       | ★            | ★            | ★            | ★★☆☆☆                     | ★              | ★            | ★            |
| <b>McKinzie, 2021 (U.S.A)<sup>2</sup></b><br>All included outcomes                                                       | 7★★★★★★★★★                        | ☆                       | ★            | ★            | ★            | ★★☆☆☆                     | ★              | ★            | ★            |
| <b>Diguisto, 2020 (France)<sup>1</sup></b><br>HC <5 <sup>th</sup> percentile                                             | 7★★★★★★★★★                        | ★                       | ★            | ★            | ★            | ★★☆☆☆                     | ★              | ★            | ☆            |
| <b>Rodriguez, 2019 (Finland)<sup>3</sup></b><br>All included outcomes                                                    | 7★★★★★★★★★                        | ☆                       | ★            | ★            | ★            | ★★☆☆☆                     | ★              | ★            | ★            |

| <b>Long-term outcomes:</b>                                                                               |                                   |                         |              |              |              |                            |              |              |              |
|----------------------------------------------------------------------------------------------------------|-----------------------------------|-------------------------|--------------|--------------|--------------|----------------------------|--------------|--------------|--------------|
| <b>Study, Year (Country)<br/>Outcome(s)</b>                                                              | <b>Total score<br/>(max: 13★)</b> | <b>Component scores</b> |              |              |              |                            |              |              |              |
|                                                                                                          |                                   | Selection               |              |              |              | Comparability              | Outcome      |              |              |
|                                                                                                          |                                   | Q1<br>max:1★            | Q2<br>max:1★ | Q3<br>max:1★ | Q4<br>max:1★ | Q1 <sup>b</sup><br>max:6★  | Q1<br>max:1★ | Q2<br>max:1★ | Q3<br>max:1★ |
| <b>Adjusted analyses:</b>                                                                                |                                   |                         |              |              |              |                            |              |              |              |
| <b>Melamed, 2019 (Canada)<sup>4</sup></b><br>All included outcomes                                       | 10★★★★★★★★★                       | ☆                       | ★            | ★            | ★            | ★★★★☆☆                     | ★            | ★            | ★            |
| <b>Raikkonen, 2022 (Finland)<sup>5</sup></b><br>All included outcomes                                    | 9★★★★★★★★★                        | ☆                       | ★            | ★            | ★            | ★★★★☆☆                     | ★            | ★            | ★            |
| <b>Raikkonen, 2020 (Finland)<sup>6</sup></b><br>All included outcomes                                    | 9★★★★★★★★★                        | ☆                       | ★            | ★            | ★            | ★★★★☆☆                     | ★            | ★            | ★            |
| <b>Osteen, 2022 (U.S.A)<sup>7</sup></b><br>All included outcomes                                         | 8★★★★★★★★★                        | ☆                       | ★            | ★            | ★            | ★★★☆☆☆                     | ★            | ★            | ★            |
| <b>Unadjusted analyses:</b>                                                                              |                                   |                         |              |              |              |                            |              |              |              |
| <b>Melamed, 2019 (Canada)<sup>4</sup></b><br>All included outcomes                                       | 8★★★★★★★★★                        | ☆                       | ★            | ★            | ★            | ★★★☆☆☆                     | ★            | ★            | ★            |
| <b>Raikkonen 2022 (Finland)<sup>5</sup></b><br>All included outcomes                                     | 7★★★★★★★                          | ☆                       | ★            | ★            | ★            | ★★★☆☆☆                     | ★            | ★            | ★            |
| <b>Raikkonen, 2020 (Finland)<sup>6</sup></b><br>All included outcomes                                    | 7★★★★★★★                          | ☆                       | ★            | ★            | ★            | ★★★☆☆☆                     | ★            | ★            | ★            |
| <b>Osteen, 2022 (U.S.A)<sup>7</sup></b><br>All included outcomes                                         | 7★★★★★★★                          | ☆                       | ★            | ★            | ★            | ★★★☆☆☆                     | ★            | ★            | ★            |
| <b>Proportion outcomes:</b>                                                                              |                                   |                         |              |              |              |                            |              |              |              |
| <b>Study, Year (Country)<br/>Outcome(s)</b>                                                              | <b>Total score<br/>(max: 13★)</b> | <b>Component scores</b> |              |              |              |                            |              |              |              |
|                                                                                                          |                                   | Selection               |              |              |              | Comparability              | Outcome      |              |              |
|                                                                                                          |                                   | Q1<br>max:1★            | Q2<br>max:1★ | Q3<br>max:1★ | Q4<br>max:1★ | Q1 <sup>c</sup><br>max: 6★ | Q1<br>max:1★ | Q2<br>max:1★ | Q3<br>max:1★ |
| <b>Raikkonen, 2020 (Finland)<sup>6</sup></b><br>Proportion of infants born at term after exposure to ACS | 7★★★★★★★                          | ☆                       | ★            | ★            | ★            | ★★★☆☆☆                     | ★            | ★            | ★            |

| <b>Infants born late preterm</b>                            |                                   |                         |              |              |              |                            |              |              |              |
|-------------------------------------------------------------|-----------------------------------|-------------------------|--------------|--------------|--------------|----------------------------|--------------|--------------|--------------|
| <b>Short-term outcomes:</b>                                 |                                   |                         |              |              |              |                            |              |              |              |
| <b>Study, Year (Country)<br/>Outcome(s)</b>                 | <b>Total score<br/>(max: 12★)</b> | <b>Component scores</b> |              |              |              |                            |              |              |              |
|                                                             |                                   | Selection               |              |              |              | Comparability              | Outcome      |              |              |
|                                                             |                                   | Q1<br>max:1★            | Q2<br>max:1★ | Q3<br>max:1★ | Q4<br>max:1★ | Q1 <sup>a</sup><br>max: 5★ | Q1<br>max:1★ | Q2<br>max:1★ | Q3<br>max:1★ |
| <b>Adjusted analyses:</b>                                   |                                   |                         |              |              |              |                            |              |              |              |
| Malloy, 2012 (U.S.A) <sup>8</sup><br>All included outcomes  | 7★★★★★★★                          | ☆                       | ★            | ★            | ★            | ★★★★☆                      | ★            | ★            | ★            |
| <b>Unadjusted analyses:</b>                                 |                                   |                         |              |              |              |                            |              |              |              |
| Aviram, 2022 (Canada) <sup>9</sup><br>All included outcomes | 8★★★★★★★                          | ☆                       | ★            | ★            | ★            | ★★★★☆                      | ★            | ★            | ★            |
| Malloy, 2012 (U.S.A) <sup>8</sup><br>All included outcomes  | 6★★★★★★                           | ☆                       | ★            | ★            | ★            | ☆☆☆☆☆                      | ★            | ★            | ★            |
| <b>Long-term outcomes:</b>                                  |                                   |                         |              |              |              |                            |              |              |              |
| <b>Study, Year (Country)<br/>Outcome(s)</b>                 | <b>Total score<br/>(max: 13★)</b> | <b>Component scores</b> |              |              |              |                            |              |              |              |
|                                                             |                                   | Selection               |              |              |              | Comparability              | Outcome      |              |              |
|                                                             |                                   | Q1<br>max:1★            | Q2<br>max:1★ | Q3<br>max:1★ | Q4<br>max:1★ | Q1 <sup>b</sup><br>max:6★  | Q1<br>max:1★ | Q2<br>max:1★ | Q3<br>max:1★ |
| <b>Adjusted analyses:</b>                                   |                                   |                         |              |              |              |                            |              |              |              |
| Aviram, 2022 (Canada) <sup>9</sup><br>All included outcomes | 10★★★★★★★                         | ☆                       | ★            | ★            | ★            | ★★★★☆                      | ★            | ★            | ★            |
| <b>Unadjusted analyses:</b>                                 |                                   |                         |              |              |              |                            |              |              |              |
| Aviram, 2022 (Canada) <sup>9</sup><br>All included outcomes | 8★★★★★★★                          | ☆                       | ★            | ★            | ★            | ★★★★☆                      | ★            | ★            | ★            |

| Proportion outcomes:                                                                                                                  |                           |                  |              |              |              |                           |              |              |              |
|---------------------------------------------------------------------------------------------------------------------------------------|---------------------------|------------------|--------------|--------------|--------------|---------------------------|--------------|--------------|--------------|
| Study, Year (Country)<br>Outcome(s)                                                                                                   | Total score<br>(max: 13★) | Component scores |              |              |              |                           |              |              |              |
|                                                                                                                                       |                           | Selection        |              |              |              | Comparability             | Outcome      |              |              |
|                                                                                                                                       |                           | Q1<br>max:1★     | Q2<br>max:1★ | Q3<br>max:1★ | Q4<br>max:1★ | Q1 <sup>c</sup><br>max:6★ | Q1<br>max:1★ | Q2<br>max:1★ | Q3<br>max:1★ |
| Malloy, 2012 (U.S.A) <sup>8</sup><br>Proportion of infants born late preterm after exposure to ACS                                    | 6 ★★★★★★                  | ☆                | ★            | ★            | ★            | ☆☆☆☆☆                     | ★            | ★            | ★            |
| Infants born at term/late preterm (combined)                                                                                          |                           |                  |              |              |              |                           |              |              |              |
| Proportion outcomes:                                                                                                                  |                           |                  |              |              |              |                           |              |              |              |
| Study, Year (Country)<br>• Outcome(s)                                                                                                 | Total score<br>(max: 13★) | Component scores |              |              |              |                           |              |              |              |
|                                                                                                                                       |                           | Selection        |              |              |              | Comparability             | Outcome      |              |              |
|                                                                                                                                       |                           | Q1<br>max:1★     | Q2<br>max:1★ | Q3<br>max:1★ | Q4<br>max:1★ | Q1 <sup>c</sup><br>max:6★ | Q1<br>max:1★ | Q2<br>max:1★ | Q3<br>max:1★ |
| Razaz, 2015 (Canada) <sup>10</sup><br>Proportion of infants born at term/late preterm (combined) after exposure to ACS (≥35 weeks GA) | 6 ★★★★★★                  | ☆                | ★            | ★            | ★            | ☆☆☆☆☆                     | ★            | ★            | ★            |
| Short-term outcomes (post-hoc analyses):                                                                                              |                           |                  |              |              |              |                           |              |              |              |
| Study, Year (Country)<br>Outcome(s) & definitions<br>(when available)                                                                 | Total score<br>(max: 12★) | Component scores |              |              |              |                           |              |              |              |
|                                                                                                                                       |                           | Selection        |              |              |              | Comparability             | Outcome      |              |              |
|                                                                                                                                       |                           | Q1<br>max:1★     | Q2<br>max:1★ | Q3<br>max:1★ | Q4<br>max:1★ | Q1 <sup>a</sup><br>max:5★ | Q1<br>max:1★ | Q2<br>max:1★ | Q3<br>max:1★ |
| Rodriguez, 2019 (Finland) <sup>3</sup><br>All included outcomes                                                                       | 7 ★★★★★★                  | ☆                | ★            | ★            | ★            | ☆☆☆☆☆                     | ★            | ★            | ★            |
| Unadjusted analyses (post-hoc analyses):                                                                                              |                           |                  |              |              |              |                           |              |              |              |
| Rodriguez, 2019 (Finland) <sup>3</sup><br>All included outcomes                                                                       | 7 ★★★★★★                  | ☆                | ★            | ★            | ★            | ☆☆☆☆☆                     | ★            | ★            | ★            |

**Legend:**

ACS – antenatal corticosteroids; BW – birthweight; GA – gestational age; HC – head circumference; Max – maximum

Newcastle-Ottawa Scale: ★ – point awarded; ☆ – no point awarded; Selection Q1 – Representativeness of exposed cohort; Selection Q2 – Selection of non-exposed cohort; Selection Q3 – Ascertainment of exposure; Selection Q4 – Demonstration that outcome of interest was not present at study start; Comparability Q1: Comparability of cohorts based on the design or analysis; Outcome Q1 – Ascertainment of outcome; Outcome Q2 – Follow-up long enough for outcomes to occur?; Outcome Q3 – Adequacy of cohort follow-up

<sup>a</sup> If the study addressed any of the following **potential confounders** or **co-variates for outcomes** (whether through exclusion, stratification, adjustment, or matching), we assigned 1 star per factor: **multiple gestation; preeclampsia/hypertension; intrauterine growth restriction; fetal anomalies; preterm premature rupture of membranes.**

<sup>b</sup> If the study addressed any of the following **potential confounders** or **co-variates for outcomes** (whether through exclusion, stratification, adjustment or matching), we assigned 1 star per factor: **multiple gestation; preeclampsia/hypertension; intrauterine growth restriction; preterm premature rupture of membranes; substance use; socioeconomic status.**

<sup>c</sup> If the study addressed any of the following **potential confounders** or **co-variates for outcomes** (whether through exclusion, stratification, adjustment or matching), we assigned 1 star per factor: **multiple gestation; preeclampsia/hypertension; intrauterine growth restriction; preterm premature rupture of membranes; fetal anomalies; maternal smoking/substance use.**

**eFigure 1: Adjusted and unadjusted analyses of secondary outcomes for infants born at term from population-based studies in a systematic review and meta-analysis on term, late preterm, and term/late preterm births after early exposure to antenatal corticosteroids**

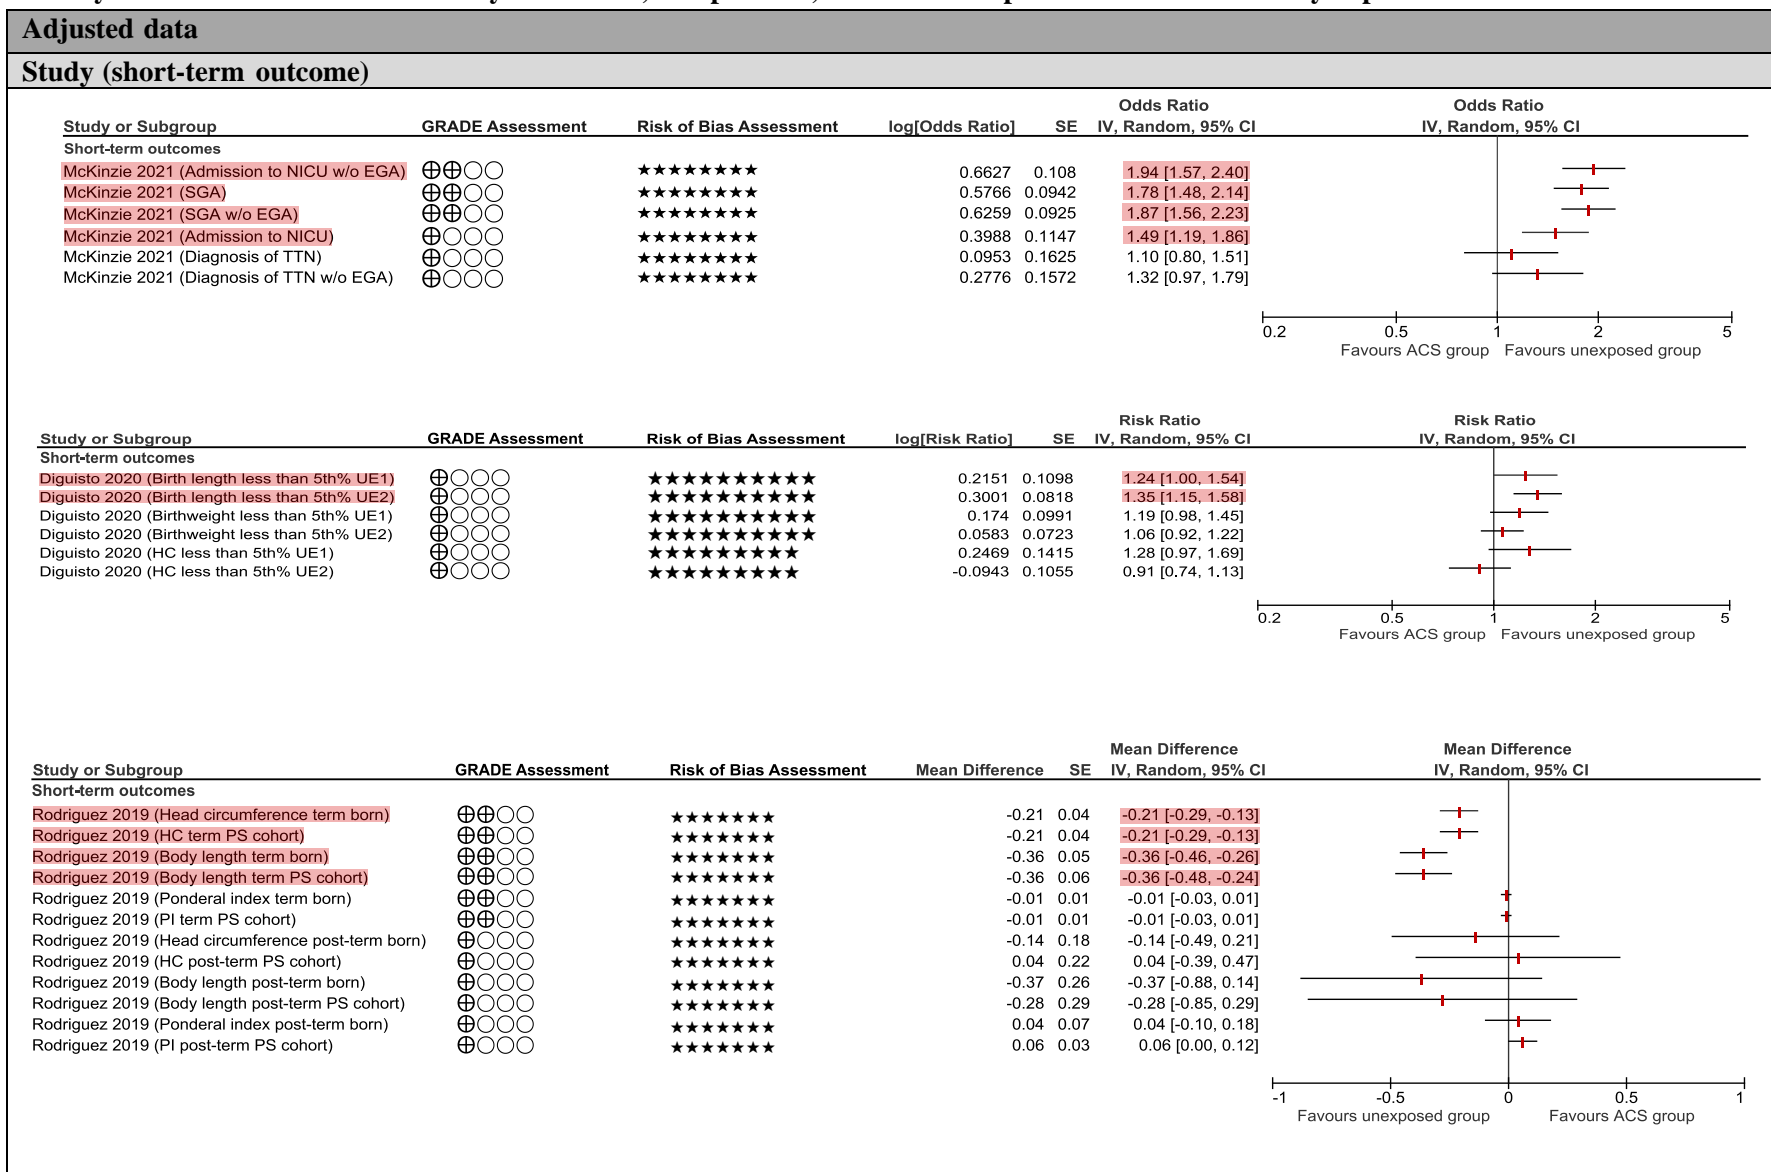

| Study or Subgroup                                | GRADE Assessment | Risk of Bias Assessment | Mean Difference |       | Mean Difference          |                    |
|--------------------------------------------------|------------------|-------------------------|-----------------|-------|--------------------------|--------------------|
|                                                  |                  |                         | Mean Difference | SE    | IV, Random, 95% CI       | IV, Random, 95% CI |
| <b>Short-term outcomes</b>                       |                  |                         |                 |       |                          |                    |
| Rodriguez 2019 (Birthweight term born)           | ⊕⊕○○             | ★★★★★★                  | -91.62          | 11.86 | -91.62 [-114.87, -68.37] |                    |
| Rodriguez 2019 (Birthweight term PS cohort)      | ⊕⊕○○             | ★★★★★★                  | -89.38          | 14.16 | -89.38 [-117.13, -61.63] |                    |
| Rodriguez 2019 (Birthweight post-term born)      | ⊕○○○             | ★★★★★★                  | -15.87          | 60.96 | -15.87 [-135.35, 103.61] |                    |
| Rodriguez 2019 (Birthweight post-term PS cohort) | ⊕○○○             | ★★★★★★                  | 26.46           | 76.01 | 26.46 [-122.52, 175.44]  |                    |

**Study (long-term outcome)**

| Study or Subgroup                                  | GRADE Assessment | Risk of Bias Assessment | Hazard Ratio      |        | Hazard Ratio       |                    |
|----------------------------------------------------|------------------|-------------------------|-------------------|--------|--------------------|--------------------|
|                                                    |                  |                         | log[Hazard Ratio] | SE     | IV, Random, 95% CI | IV, Random, 95% CI |
| <b>Long-term outcomes</b>                          |                  |                         |                   |        |                    |                    |
| Melamed 2019 (Composite long-term outcome)         | ⊕⊕○○             | ★★★★★★★★★★              | 0.1133            | 0.0186 | 1.12 [1.08, 1.16]  |                    |
| Melamed 2019 (Composite long-term w/o NICU/BW)     | ⊕⊕○○             | ★★★★★★★★★★              | 0.1133            | 0.0186 | 1.12 [1.08, 1.16]  |                    |
| Melamed 2019 (Suspected neurocognitive disorder)   | ⊕⊕○○             | ★★★★★★★★★★              | 0.1484            | 0.0271 | 1.16 [1.10, 1.21]  |                    |
| Melamed 2019 (Susp. neurocog disorder w/o NICU/BW) | ⊕⊕○○             | ★★★★★★★★★★              | 0.157             | 0.0269 | 1.17 [1.11, 1.23]  |                    |
| Melamed 2019 (Visual testing)                      | ⊕⊕○○             | ★★★★★★★★★★              | 0.077             | 0.0193 | 1.08 [1.04, 1.12]  |                    |
| Melamed 2019 (Visual testing w/o NICU/BW)          | ⊕⊕○○             | ★★★★★★★★★★              | 0.0296            | 0.0427 | 1.03 [1.03, 1.12]  |                    |
| Melamed 2019 (Audiometry testing)                  | ⊕⊕○○             | ★★★★★★★★★★              | 0.1655            | 0.0312 | 1.18 [1.11, 1.25]  |                    |
| Melamed 2019 (Audiometry testing w/o NICU/BW)      | ⊕⊕○○             | ★★★★★★★★★★              | 0.1655            | 0.0312 | 1.18 [1.11, 1.26]  |                    |
| Raikkonen 2020 (Any mental/behavioural disorder)   | ⊕⊕○○             | ★★★★★★★★★★              | 0.3853            | 0.0397 | 1.47 [1.36, 1.60]  |                    |
| Raikkonen 2022 (Cerebral palsy)                    | ⊕⊕○○             | ★★★★★★★★★★              | 0.7793            | 0.2011 | 2.18 [1.47, 3.23]  |                    |
| Raikkonen 2020 (Psych development disorders)       | ⊕⊕○○             | ★★★★★★★★★★              | 0.3716            | 0.0636 | 1.45 [1.28, 1.64]  |                    |
| Raikkonen 2022 (Other psych development disorder)  | ⊕⊕○○             | ★★★★★★★★★★              | 0.6523            | 0.1226 | 1.92 [1.51, 2.43]  |                    |
| Raikkonen 2022 (Speech/language develop disorders) | ⊕⊕○○             | ★★★★★★★★★★              | 0.3853            | 0.0588 | 1.47 [1.31, 1.66]  |                    |
| Raikkonen 2020 (Sleep disorders)                   | ⊕⊕○○             | ★★★★★★★★★★              | 0.5822            | 0.1593 | 1.79 [1.31, 2.44]  |                    |
| Melamed 2019 (Audiometry/susp. neurocog disorder)  | ⊕○○○             | ★★★★★★★★★★              | 0.207             | 0.0388 | 1.23 [1.14, 1.34]  |                    |
| Melamed 2019 (Audio/susp. neurocog w/o NICU/BW)    | ⊕○○○             | ★★★★★★★★★★              | 0.2311            | 0.0466 | 1.26 [1.15, 1.38]  |                    |
| Raikkonen 2022 (Scholastic skill develop disorder) | ⊕○○○             | ★★★★★★★★★★              | 0.2469            | 0.1209 | 1.28 [1.01, 1.63]  |                    |
| Raikkonen 2022 (Motor function develop disorders)  | ⊕○○○             | ★★★★★★★★★★              | 0.3221            | 0.1065 | 1.38 [1.12, 1.70]  |                    |
| Raikkonen 2022 (Pervasive developmental disorder)  | ⊕○○○             | ★★★★★★★★★★              | 0.3507            | 0.1032 | 1.42 [1.16, 1.75]  |                    |
| Raikkonen 2022 (Epilepsy)                          | ⊕○○○             | ★★★★★★★★★★              | 0.4511            | 0.1287 | 1.57 [1.22, 2.01]  |                    |
| Raikkonen 2020 (ADD/conduct disorders)             | ⊕○○○             | ★★★★★★★★★★              | 0.2852            | 0.1158 | 1.33 [1.06, 1.65]  |                    |
| Raikkonen 2020 (Mixed disorders conduct/emotions)  | ⊕○○○             | ★★★★★★★★★★              | 0.3507            | 0.1121 | 1.42 [1.14, 1.76]  |                    |
| Raikkonen 2020 (Other behaviour/emotion disorders) | ⊕○○○             | ★★★★★★★★★★              | 0.3646            | 0.0973 | 1.44 [1.19, 1.73]  |                    |
| Raikkonen 2022 (Vision or hearing loss)            | ⊕○○○             | ★★★★★★★★★★              | 0.239             | 0.1323 | 1.27 [0.98, 1.64]  |                    |
| Raikkonen 2020 (Autism spectrum disorders)         | ⊕○○○             | ★★★★★★★★★★              | 0.0583            | 0.1903 | 1.06 [0.73, 1.54]  |                    |
| Raikkonen 2020 (Psych, mood, neurotic disorders)   | ⊕○○○             | ★★★★★★★★★★              | 0.1823            | 0.2069 | 1.20 [0.80, 1.80]  |                    |
| Raikkonen 2020 (Eating disorders)                  | ⊕○○○             | ★★★★★★★★★★              | 0.4762            | 0.5036 | 1.61 [0.60, 4.35]  |                    |
| Raikkonen 2020 (Mild/mod intellectual disability)  | ⊕○○○             | ★★★★★★★★★★              | -0.0408           | 0.2069 | 0.96 [0.64, 1.42]  |                    |
| Raikkonen 2020 (Severe intellectual disability)    | ⊕○○○             | ★★★★★★★★★★              | 0.157             | 0.5874 | 1.17 [0.37, 3.69]  |                    |



| Study or Subgroup                    | GRADE Assessment | Risk of Bias Assessment | log[Odds Ratio] | SE     | Odds Ratio         |                    | Odds Ratio<br>IV, Random, 95% CI |
|--------------------------------------|------------------|-------------------------|-----------------|--------|--------------------|--------------------|----------------------------------|
|                                      |                  |                         |                 |        | IV, Random, 95% CI | IV, Random, 95% CI |                                  |
| Long-term outcomes                   |                  |                         |                 |        |                    |                    |                                  |
| Osteen 2022 (Asthma)                 | ⊕○○○             | ★★★★★★                  | 0.0488          | 0.1452 | 1.05               | [0.79, 1.39]       |                                  |
| Osteen 2022 (Weight less than 10th%) | ⊕○○○             | ★★★★★★                  | 0.6931          | 0.2522 | 2.00               | [1.22, 3.25]       |                                  |

## Unadjusted data

### Study (short-term outcome)

| Study or Subgroup                  | GRADE Assessment | Risk of Bias Assessment | ACS group |      |       | Unexposed group |      |       | Mean Difference    |                    | Mean Difference<br>IV, Random, 95% CI |
|------------------------------------|------------------|-------------------------|-----------|------|-------|-----------------|------|-------|--------------------|--------------------|---------------------------------------|
|                                    |                  |                         | Mean      | SD   | Total | Mean            | SD   | Total | IV, Random, 95% CI | IV, Random, 95% CI |                                       |
| Short-term outcomes                |                  |                         |           |      |       |                 |      |       |                    |                    |                                       |
| McKinzie 2021 (Head circumference) | ⊕○○○             | ★★★★★★                  | 33.9      | 9.1  | 1459  | 34.4            | 9.7  | 3871  | -0.50              | [-1.06, 0.06]      |                                       |
| McKinzie 2021 (Birth length)       | ⊕○○○             | ★★★★★★                  | 50.5      | 17.4 | 1459  | 52.6            | 90.3 | 3871  | -2.10              | [-5.08, 0.88]      |                                       |

| Study or Subgroup                                  | GRADE Assessment | Risk of Bias Assessment | Mean Difference | SE   | Mean Difference    |                    | Mean Difference<br>IV, Random, 95% CI |
|----------------------------------------------------|------------------|-------------------------|-----------------|------|--------------------|--------------------|---------------------------------------|
|                                                    |                  |                         |                 |      | IV, Random, 95% CI | IV, Random, 95% CI |                                       |
| Short-term outcomes                                |                  |                         |                 |      |                    |                    |                                       |
| Rodriguez 2019 (Head circumference term born)      | ⊕○○○             | ★★★★★★                  | -0.25           | 0.03 | -0.25              | [-0.31, -0.19]     |                                       |
| Rodriguez 2019 (Head circumference post-term born) | ⊕○○○             | ★★★★★★                  | -0.19           | 0.16 | -0.19              | [-0.50, 0.12]      |                                       |
| Rodriguez 2019 (Body length term born)             | ⊕○○○             | ★★★★★★                  | -0.44           | 0.05 | -0.44              | [-0.54, -0.34]     |                                       |
| Rodriguez 2019 (Body length post-term born)        | ⊕○○○             | ★★★★★★                  | -0.25           | 0.22 | -0.25              | [-0.68, 0.18]      |                                       |
| Rodriguez 2019 (Ponderal index term born)          | ⊕○○○             | ★★★★★★                  | -0.01           | 0.01 | -0.01              | [-0.03, 0.01]      |                                       |
| Rodriguez 2019 (Ponderal index post-term born)     | ⊕○○○             | ★★★★★★                  | 0.03            | 0.05 | 0.03               | [-0.07, 0.13]      |                                       |

| Study or Subgroup                           | GRADE Assessment | Risk of Bias Assessment | Mean Difference | SE    | Mean Difference    |                    | Mean Difference<br>IV, Random, 95% CI |
|---------------------------------------------|------------------|-------------------------|-----------------|-------|--------------------|--------------------|---------------------------------------|
|                                             |                  |                         |                 |       | IV, Random, 95% CI | IV, Random, 95% CI |                                       |
| Short-term outcomes                         |                  |                         |                 |       |                    |                    |                                       |
| Rodriguez 2019 (Birthweight term born)      | ⊕⊕○○             | ★★★★★★                  | -101.95         | 10.89 | -101.95            | [-123.29, -80.61]  |                                       |
| Rodriguez 2019 (Birthweight post-term born) | ⊕○○○             | ★★★★★★                  | -8.66           | 52.02 | -8.66              | [-110.62, 93.30]   |                                       |

| Study or Subgroup                                     | GRADE Assessment | Risk of Bias Assessment | ACS group |       | Unexposed group |        | Risk Ratio           | Risk Ratio         |
|-------------------------------------------------------|------------------|-------------------------|-----------|-------|-----------------|--------|----------------------|--------------------|
|                                                       |                  |                         | Events    | Total | Events          | Total  | IV, Random, 95% CI   | IV, Random, 95% CI |
| <b>Short-term outcomes</b>                            |                  |                         |           |       |                 |        |                      |                    |
| Digusto 2020 (Birth length less than 5th% UE1)        | ⊕⊕○○             | ★★★★★★                  | 292       | 3276  | 411             | 6848   | 1.49 [1.29, 1.72]    |                    |
| Diguisto 2020 (Birth length less than 5th% UE2)       | ⊕⊕○○             | ★★★★★★                  | 292       | 3276  | 9473            | 193319 | 1.82 [1.63, 2.03]    |                    |
| Diguisto 2020 (Birthweight less than 5th% UE1)        | ⊕⊕○○             | ★★★★★★                  | 360       | 4043  | 510             | 10008  | 1.75 [1.53, 1.99]    |                    |
| Diguisto 2020 (Birthweight less than 5th% UE2)        | ⊕⊕○○             | ★★★★★★                  | 360       | 4043  | 12267           | 261006 | 1.89 [1.71, 2.09]    |                    |
| Melamed 2019 (BW less than 10th%)                     | ⊕⊕○○             | ★★★★★★                  | 656       | 5423  | 45989           | 523782 | 1.38 [1.28, 1.48]    |                    |
| Melamed 2019 (Resuscitation at birth)                 | ⊕⊕○○             | ★★★★★★                  | 856       | 5423  | 75305           | 523782 | 1.10 [1.03, 1.17]    |                    |
| Diguisto 2020 (HC less than 5th% UE1)                 | ⊕⊕○○             | ★★★★★★                  | 197       | 3388  | 304             | 7077   | 1.35 [1.14, 1.61]    |                    |
| McKinzie 2021 (SGA)                                   | ⊕⊕○○             | ★★★★★★                  | 263       | 1340  | 436             | 3565   | 1.60 [1.40, 1.85]    |                    |
| McKinzie 2021 (Treated hypoglycemia)                  | ⊕⊕○○             | ★★★★★★                  | 96        | 1459  | 120             | 3871   | 2.12 [1.63, 2.76]    |                    |
| Rodriguez 2019 (Hospitalization status beyond 7 days) | ⊕⊕○○             | ★★★★★★                  | 77        | 1344  | 176             | 6718   | 2.19 [1.68, 2.84]    |                    |
| Rodriguez 2019 (Hospital transfer)                    | ⊕⊕○○             | ★★★★★★                  | 18        | 1346  | 40              | 6730   | 2.25 [1.29, 3.91]    |                    |
| Rodriguez 2019 (Metabolic disorder screening)         | ⊕⊕○○             | ★★★★★★                  | 56        | 1346  | 113             | 6730   | 2.48 [1.81, 3.40]    |                    |
| Rodriguez 2019 (Hypothyroidism screening)             | ⊕⊕○○             | ★★★★★★                  | 1323      | 1346  | 6499            | 6730   | 1.02 [1.01, 1.03]    |                    |
| Rodriguez 2019 (Vitamin K)                            | ⊕⊕○○             | ★★★★★★                  | 1337      | 1346  | 6674            | 6730   | 1.00 [1.00, 1.01]    |                    |
| Melamed 2019 (Apgar score less than 7 at 5 min)       | ⊕○○○             | ★★★★★★                  | 42        | 5423  | 3714            | 523782 | 1.09 [0.81, 1.48]    |                    |
| Diguisto 2020 (HC less than 5th% UE2)                 | ⊕○○○             | ★★★★★★                  | 197       | 3388  | 9129            | 198462 | 1.26 [1.10, 1.45]    |                    |
| McKinzie 2021 (Diagnosis of TTN)                      | ⊕○○○             | ★★★★★★                  | 74        | 1459  | 141             | 3871   | 1.39 [1.06, 1.83]    |                    |
| McKinzie 2021 (Hyperbilirubinemia req treatment)      | ⊕○○○             | ★★★★★★                  | 244       | 1459  | 562             | 3871   | 1.15 [1.00, 1.32]    |                    |
| McKinzie 2021 (Meconium aspiration syndrome)          | ⊕○○○             | ★★★★★★                  | 5         | 1459  | 18              | 3871   | 0.74 [0.27, 1.98]    |                    |
| Rodriguez 2019 (Respiratory care)                     | ⊕○○○             | ★★★★★★                  | 12        | 1346  | 20              | 6730   | 3.00 [1.47, 6.12]    |                    |
| Rodriguez 2019 (Antibiotic treatment)                 | ⊕○○○             | ★★★★★★                  | 76        | 1346  | 256             | 6730   | 1.48 [1.16, 1.90]    |                    |
| Rodriguez 2019 (Blood transfusion)                    | ⊕○○○             | ★★★★★★                  | 1         | 1346  | 0               | 6730   | 14.99 [0.61, 367.80] |                    |
| Rodriguez 2019 (Light therapy)                        | ⊕○○○             | ★★★★★★                  | 66        | 1346  | 261             | 6730   | 1.26 [0.97, 1.65]    |                    |
| Rodriguez 2019 (BCG vaccination)                      | ⊕○○○             | ★★★★★★                  | 217       | 1346  | 1065            | 6730   | 1.02 [0.89, 1.16]    |                    |

**Study (long-term outcome)**

| Study or Subgroup                                  | GRADE Assessment | Risk of Bias Assessment | ACS group |     |       | Unexposed group |     |       | Mean Difference    | Mean Difference    |
|----------------------------------------------------|------------------|-------------------------|-----------|-----|-------|-----------------|-----|-------|--------------------|--------------------|
|                                                    |                  |                         | Mean      | SD  | Total | Mean            | SD  | Total | IV, Random, 95% CI | IV, Random, 95% CI |
| <b>Long-term outcomes</b>                          |                  |                         |           |     |       |                 |     |       |                    |                    |
| Osteen 2022 (Number of childhood hospitalizations) | ⊕○○○             | ★★★★★★                  | 0.2       | 0.1 | 629   | 0.2             | 0.1 | 2927  | 0.00 [-0.01, 0.01] |                    |

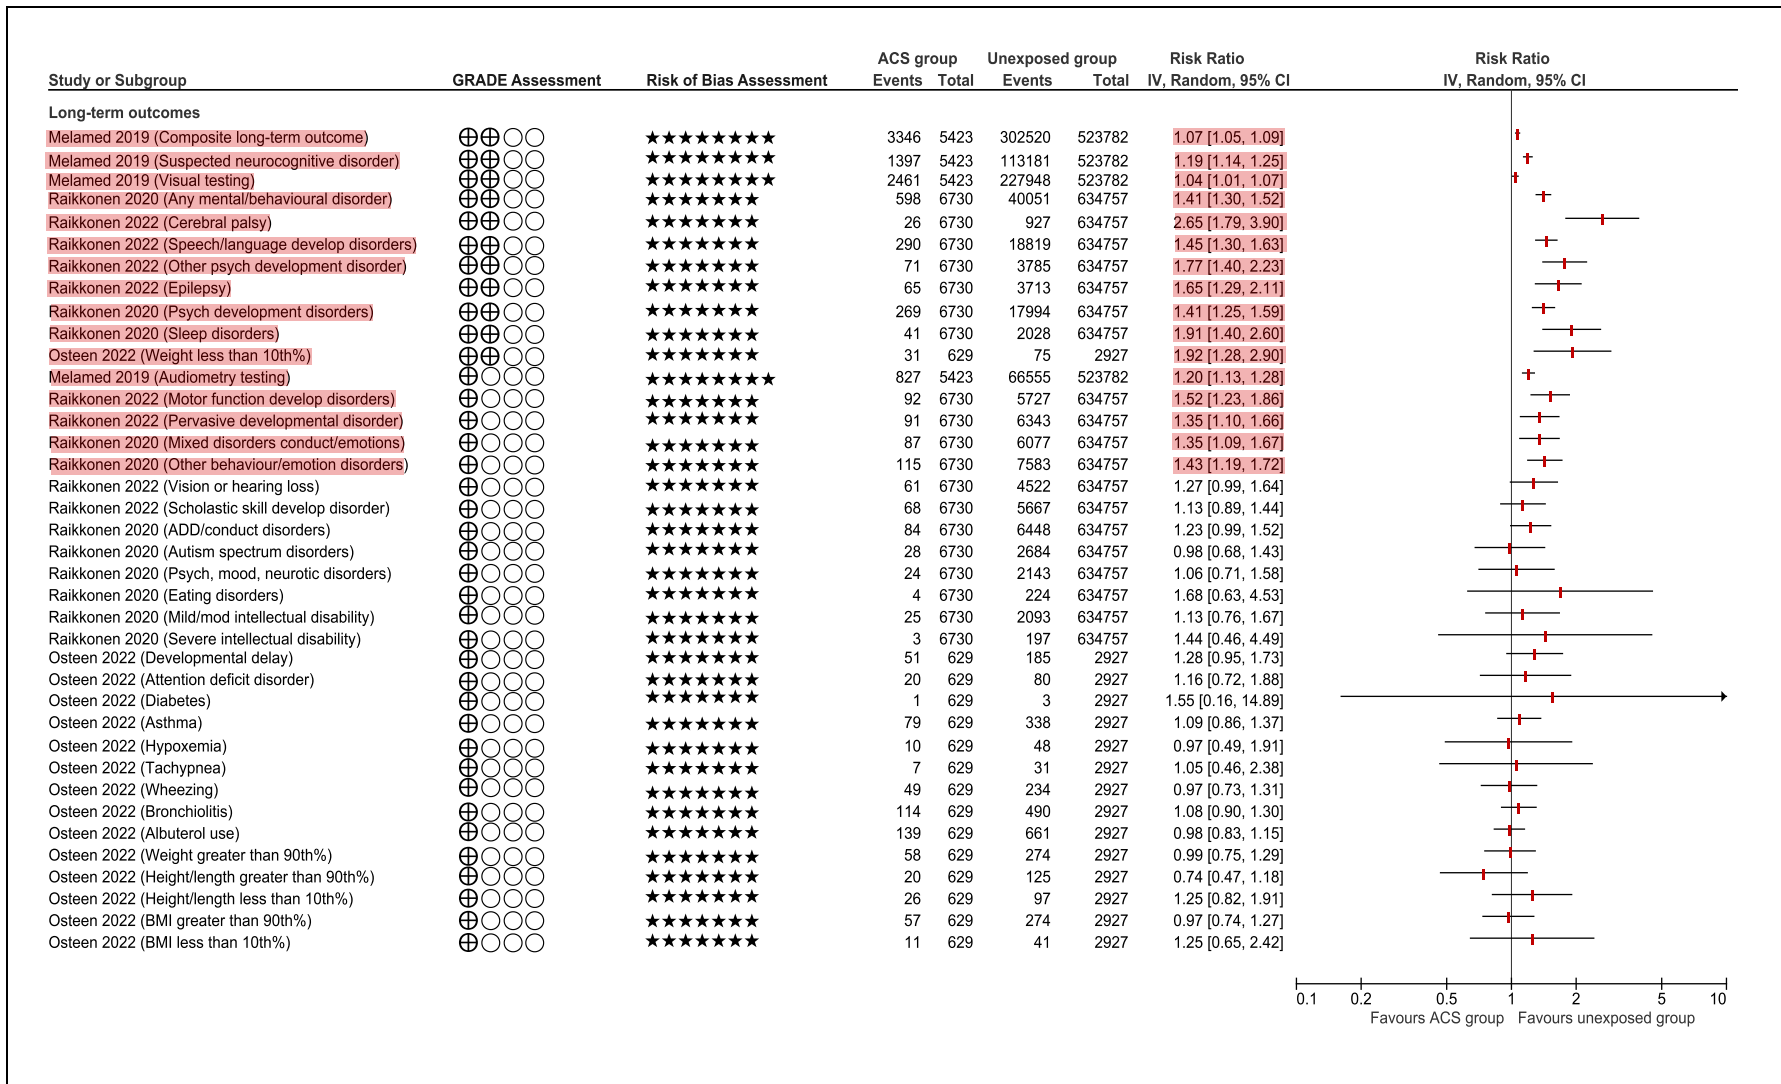

**Legend:**

ACS – antenatal corticosteroids; ADD – attention deficit disorder; audio – audiometry; BCG – Bacille Calmette-Guérin; BMI – body mass index; BW – birthweight; CI – confidence interval; develop – development/developmental; EGA – estimated gestational age; HC – head circumference; IV – inverse variance; min – minutes; mod – moderate; NICU – neonatal intensive care unit; PI – ponderal index; PS – propensity score; psych – psychological/psychotic; **Red highlighting** – statistically significant association with adverse outcome; req – requiring; SE – standard error; SGA – small for gestational age; susp. neurocog – suspected neurocognitive; TTN – transient tachypnea of the newborn; UE1 – unexposed group 1 (an episode of threatened preterm labour without corticosteroids); UE2 – unexposed group 2 (neither threatened preterm labor nor corticosteroids); w/o – without

Newcastle-Ottawa Scale: ★ – point awarded; a maximum of 12 points could be awarded when assessing risk of bias for short-term outcomes, a maximum of 13 points could be awarded when assessing risk of bias for long-term outcomes.

GRADE Assessment: ⊕○○○ – very low certainty; ⊕⊕○○ – low certainty

**eFigure 2: Pooled secondary outcomes for infants born at term from population-based studies in a systematic review and meta-analysis on term, late preterm, and term/late preterm births after early exposure to antenatal corticosteroids**

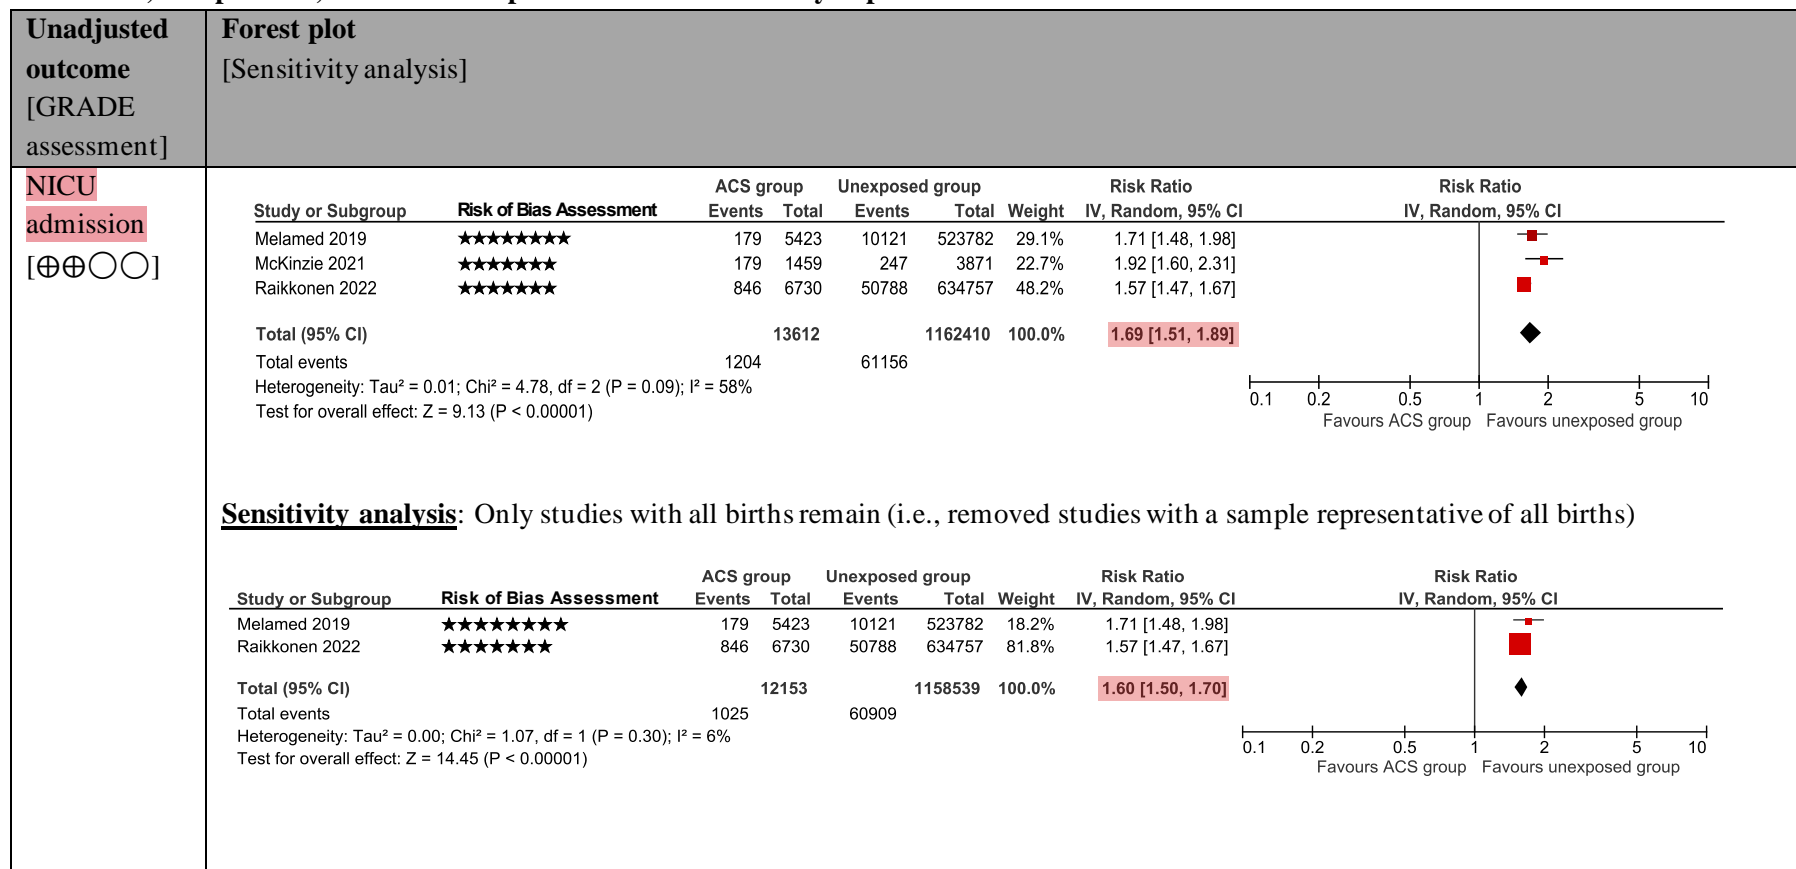

|                                                 |                                              |
|-------------------------------------------------|----------------------------------------------|
| <b>Unadjusted outcome</b><br>[GRADE assessment] | <b>Forest plot</b><br>[Sensitivity analysis] |
|-------------------------------------------------|----------------------------------------------|

**Subgroup analysis: GA at ACS administration**

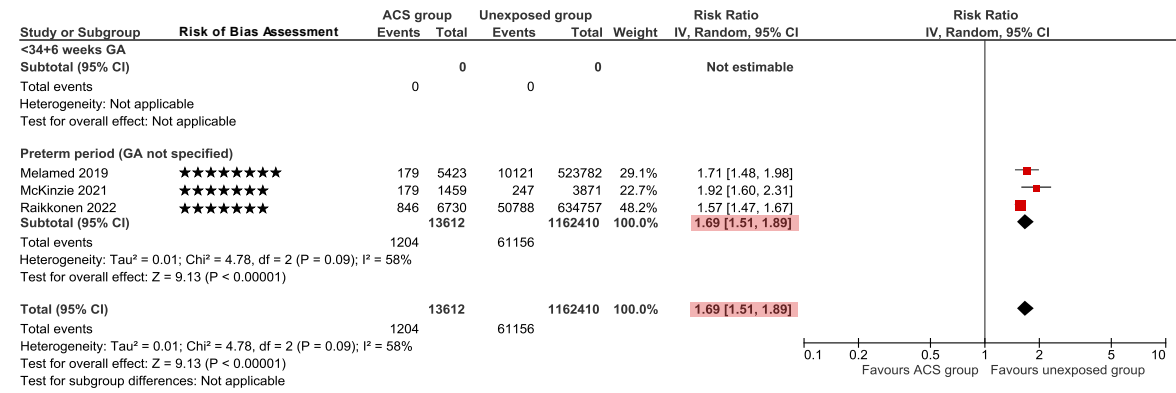

**Subgroup analysis: Number of ACS courses\***

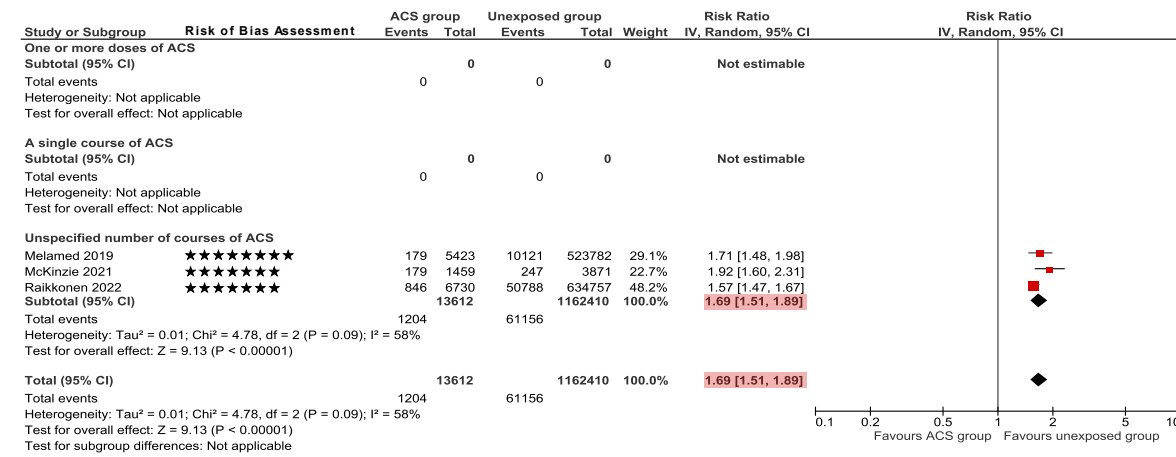

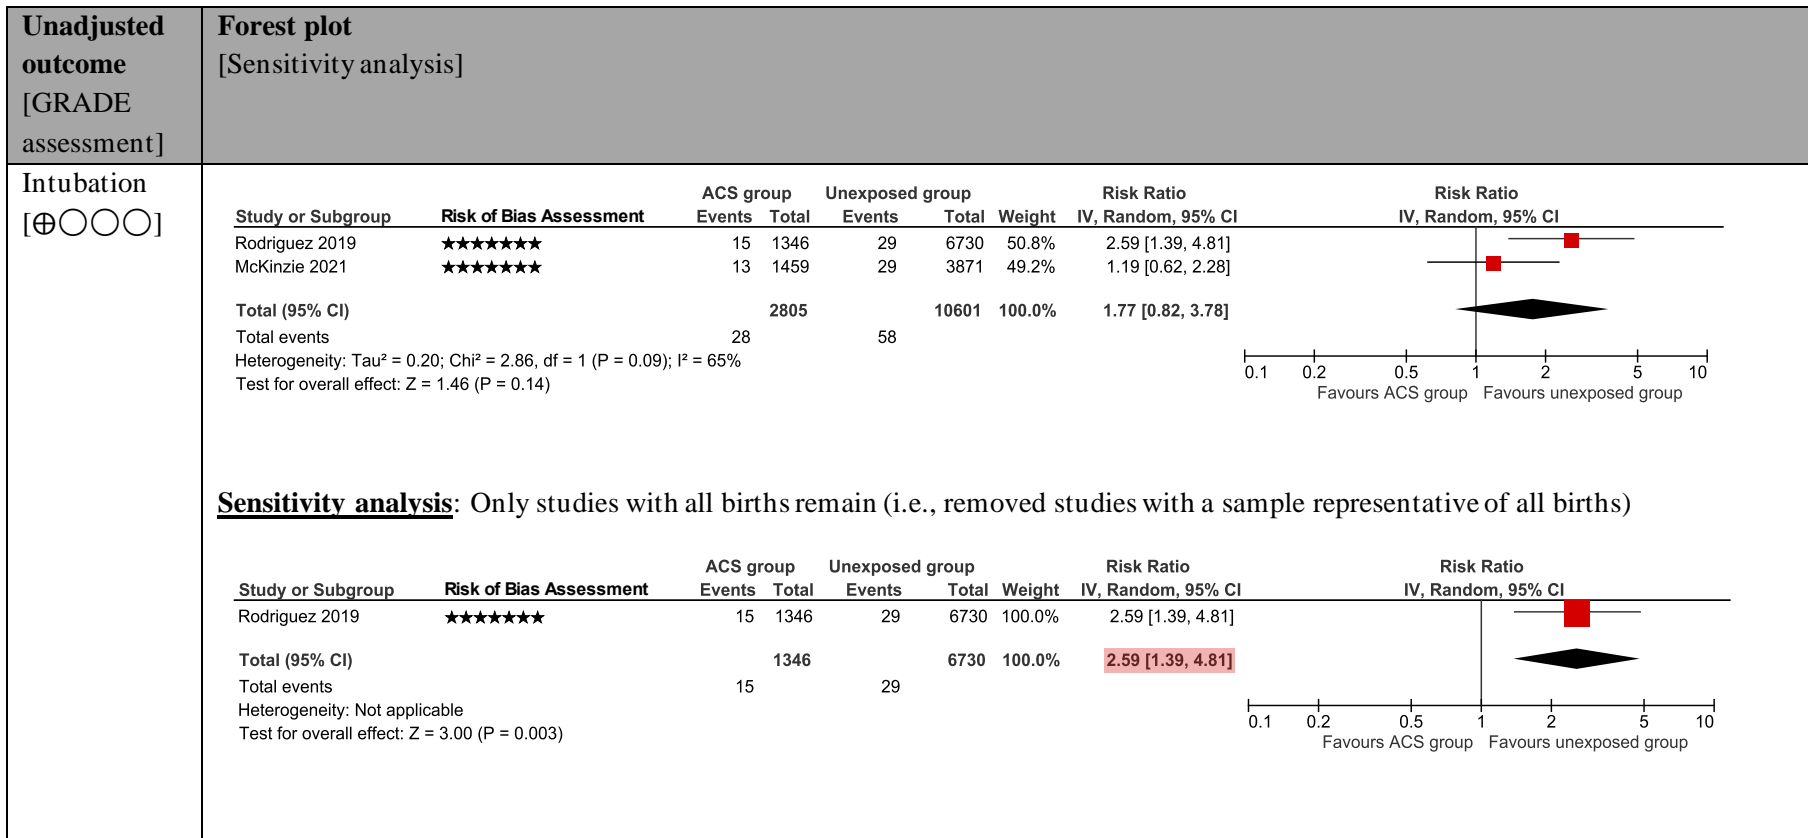

|                                                 |                                              |
|-------------------------------------------------|----------------------------------------------|
| <b>Unadjusted outcome</b><br>[GRADE assessment] | <b>Forest plot</b><br>[Sensitivity analysis] |
|-------------------------------------------------|----------------------------------------------|

**Subgroup analysis: GA at ACS administration**

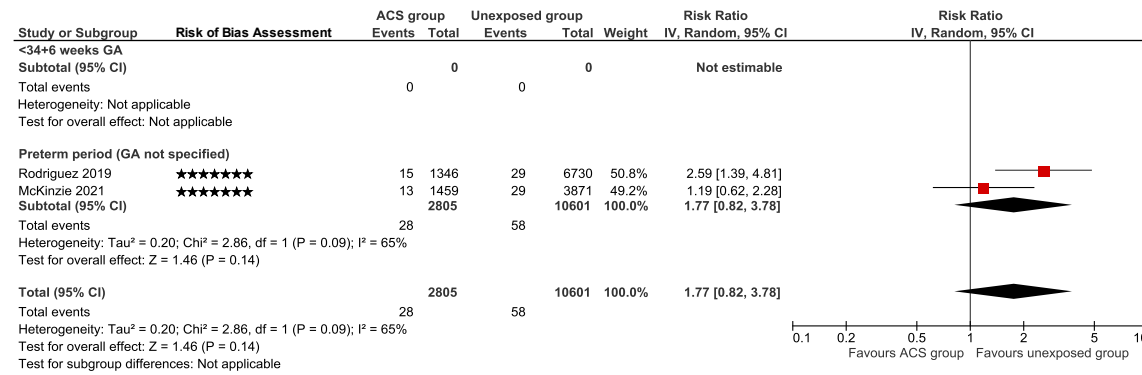

**Subgroup analysis: Number of ACS courses\***

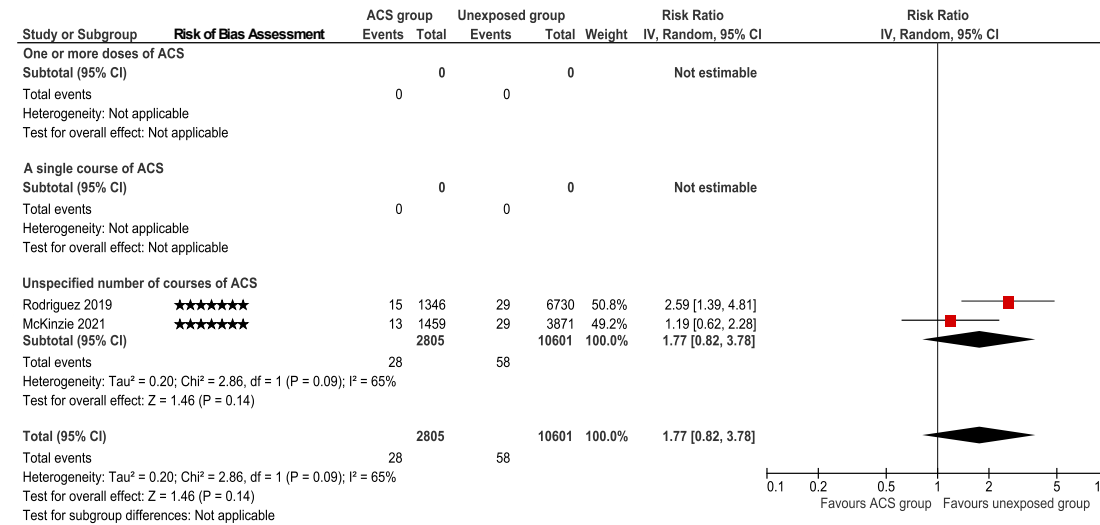



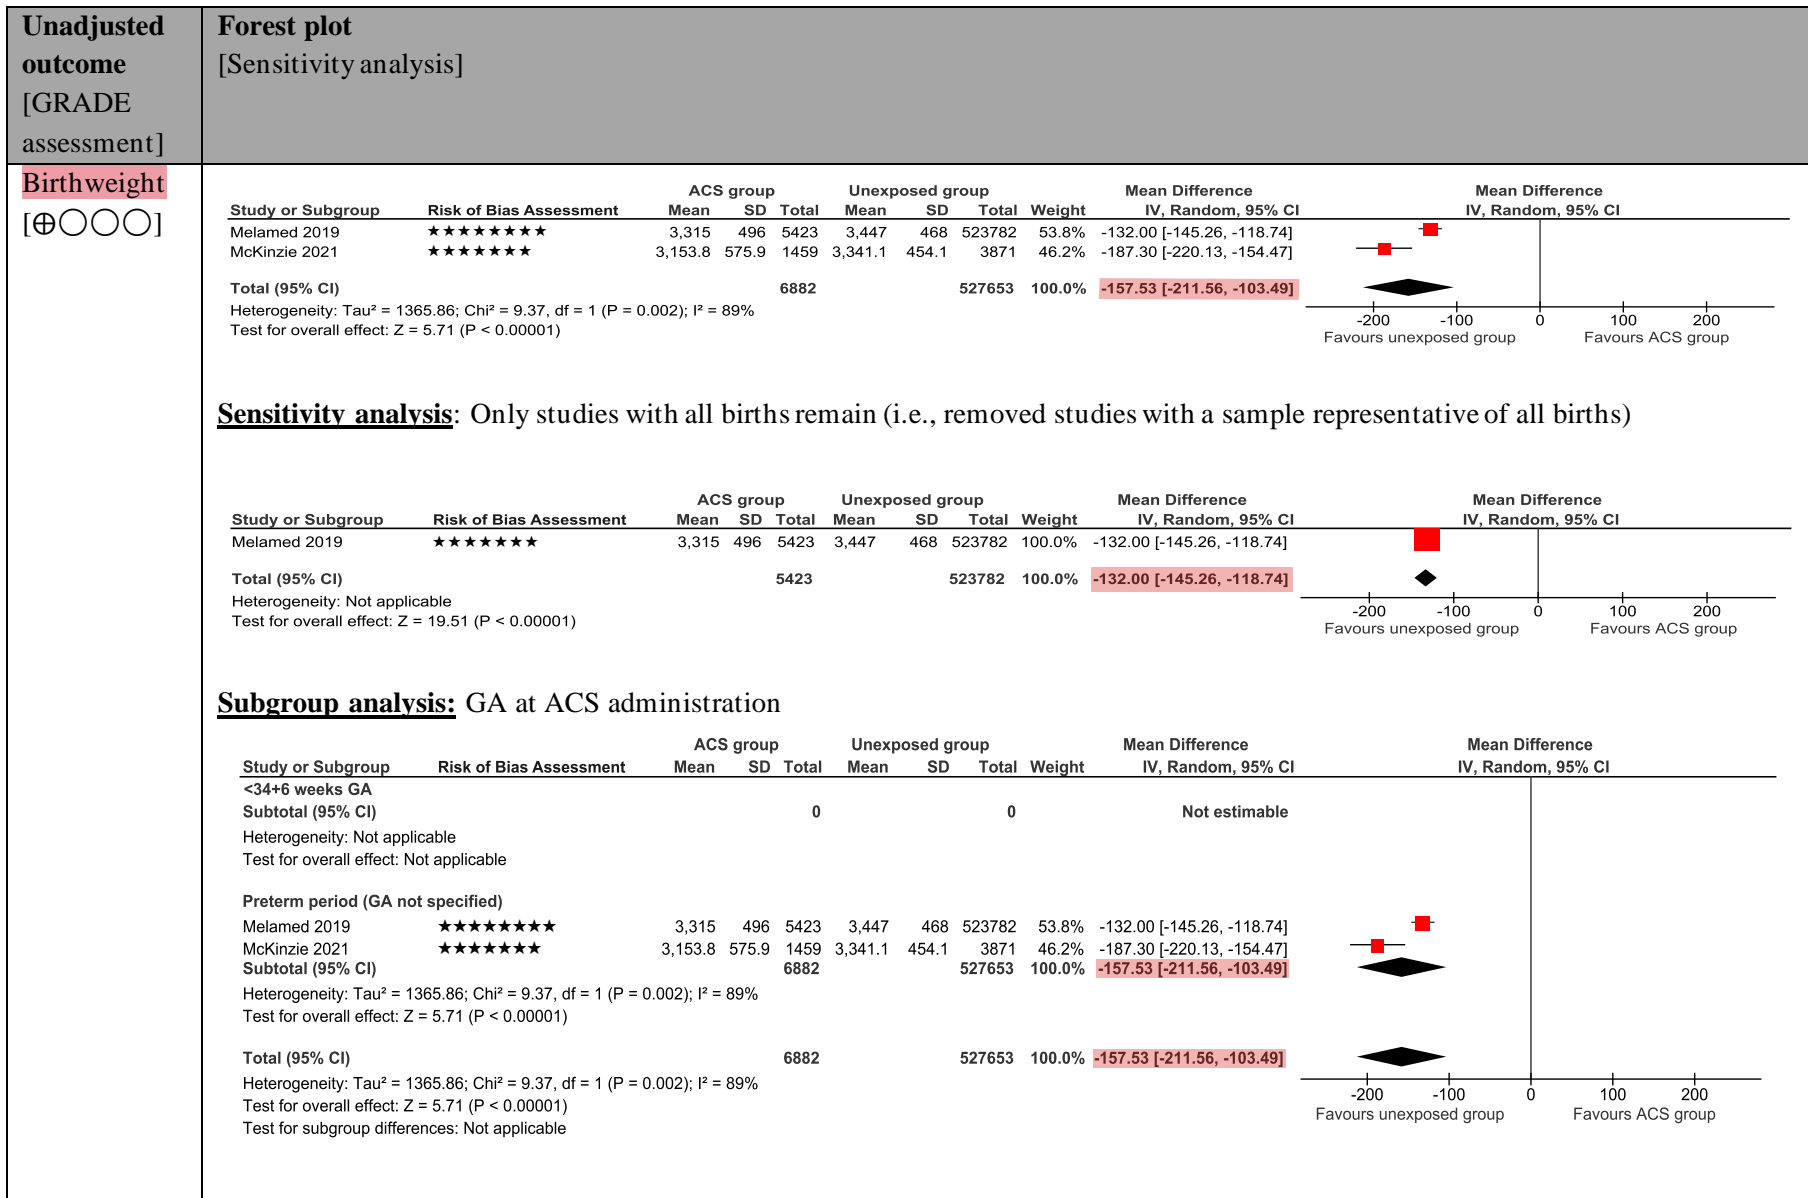

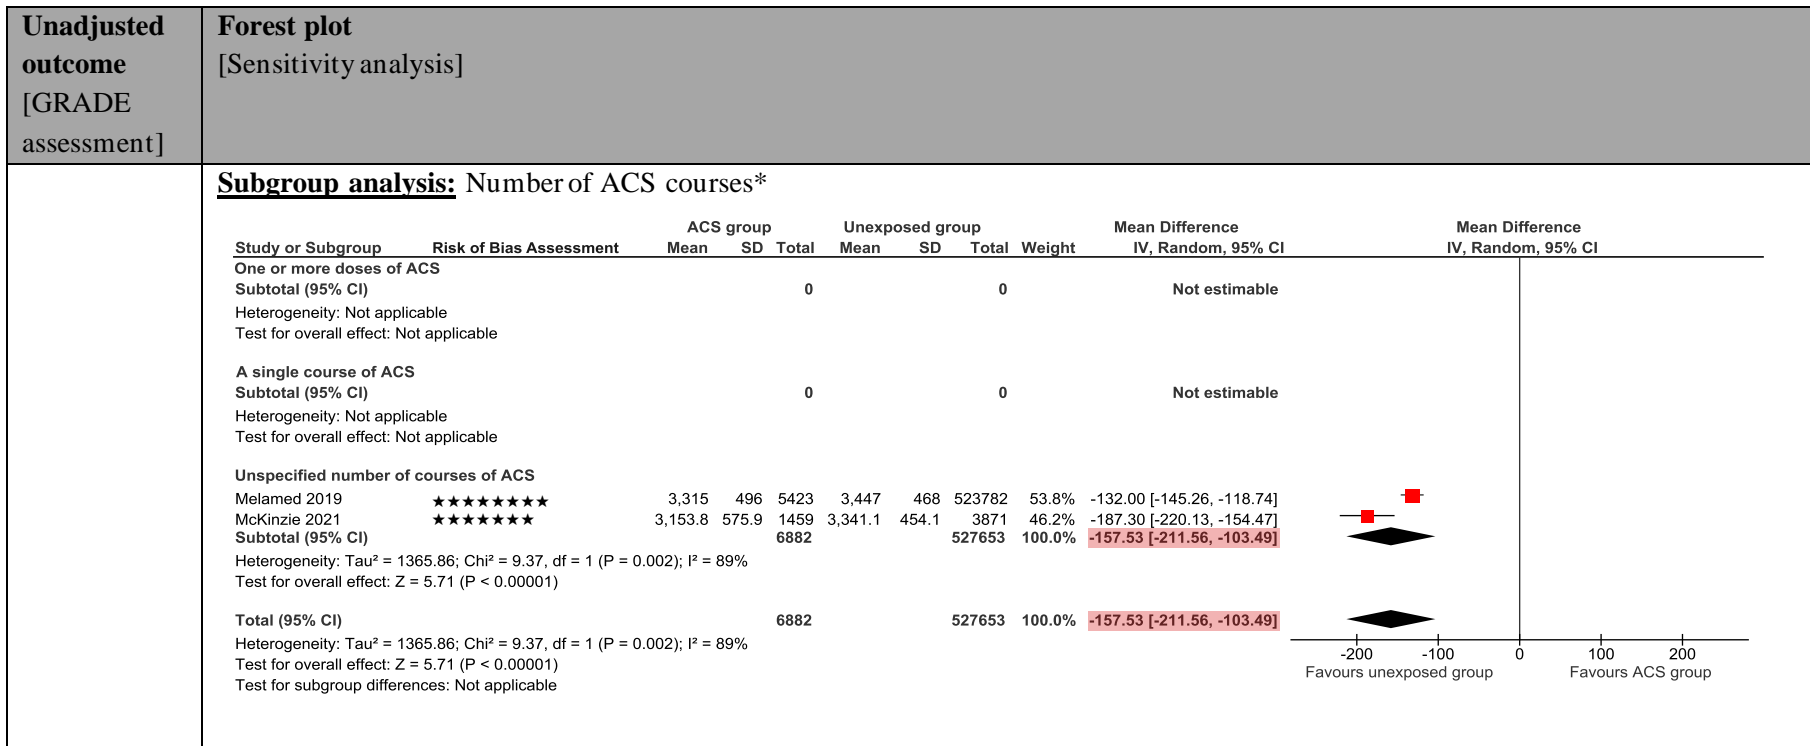

**Legend:**

ACS – antenatal corticosteroids; CI – confidence interval; df – degrees of freedom; GA – gestational age; IV – inverse variance; NICU – neonatal intensive care unit; **red highlighting** – statistically significant association with adverse outcome; SD – standard deviation

Newcastle-Ottawa Scale: ★ – point awarded; a maximum of 12 points could be awarded when assessing risk of bias for short-term outcomes.

GRADE Assessment: ⊕○○○ – very low certainty; ⊕⊕○○ – low certainty

\*The subgroup of "unspecified number of courses of ACS" were likely a single course based on clinical guidelines

**eFigure 3: Adjusted and unadjusted analyses of secondary outcomes for infants born late preterm from population-based studies in a systematic review and meta-analysis on term, late preterm, and term/late preterm births after early exposure to antenatal corticosteroids**

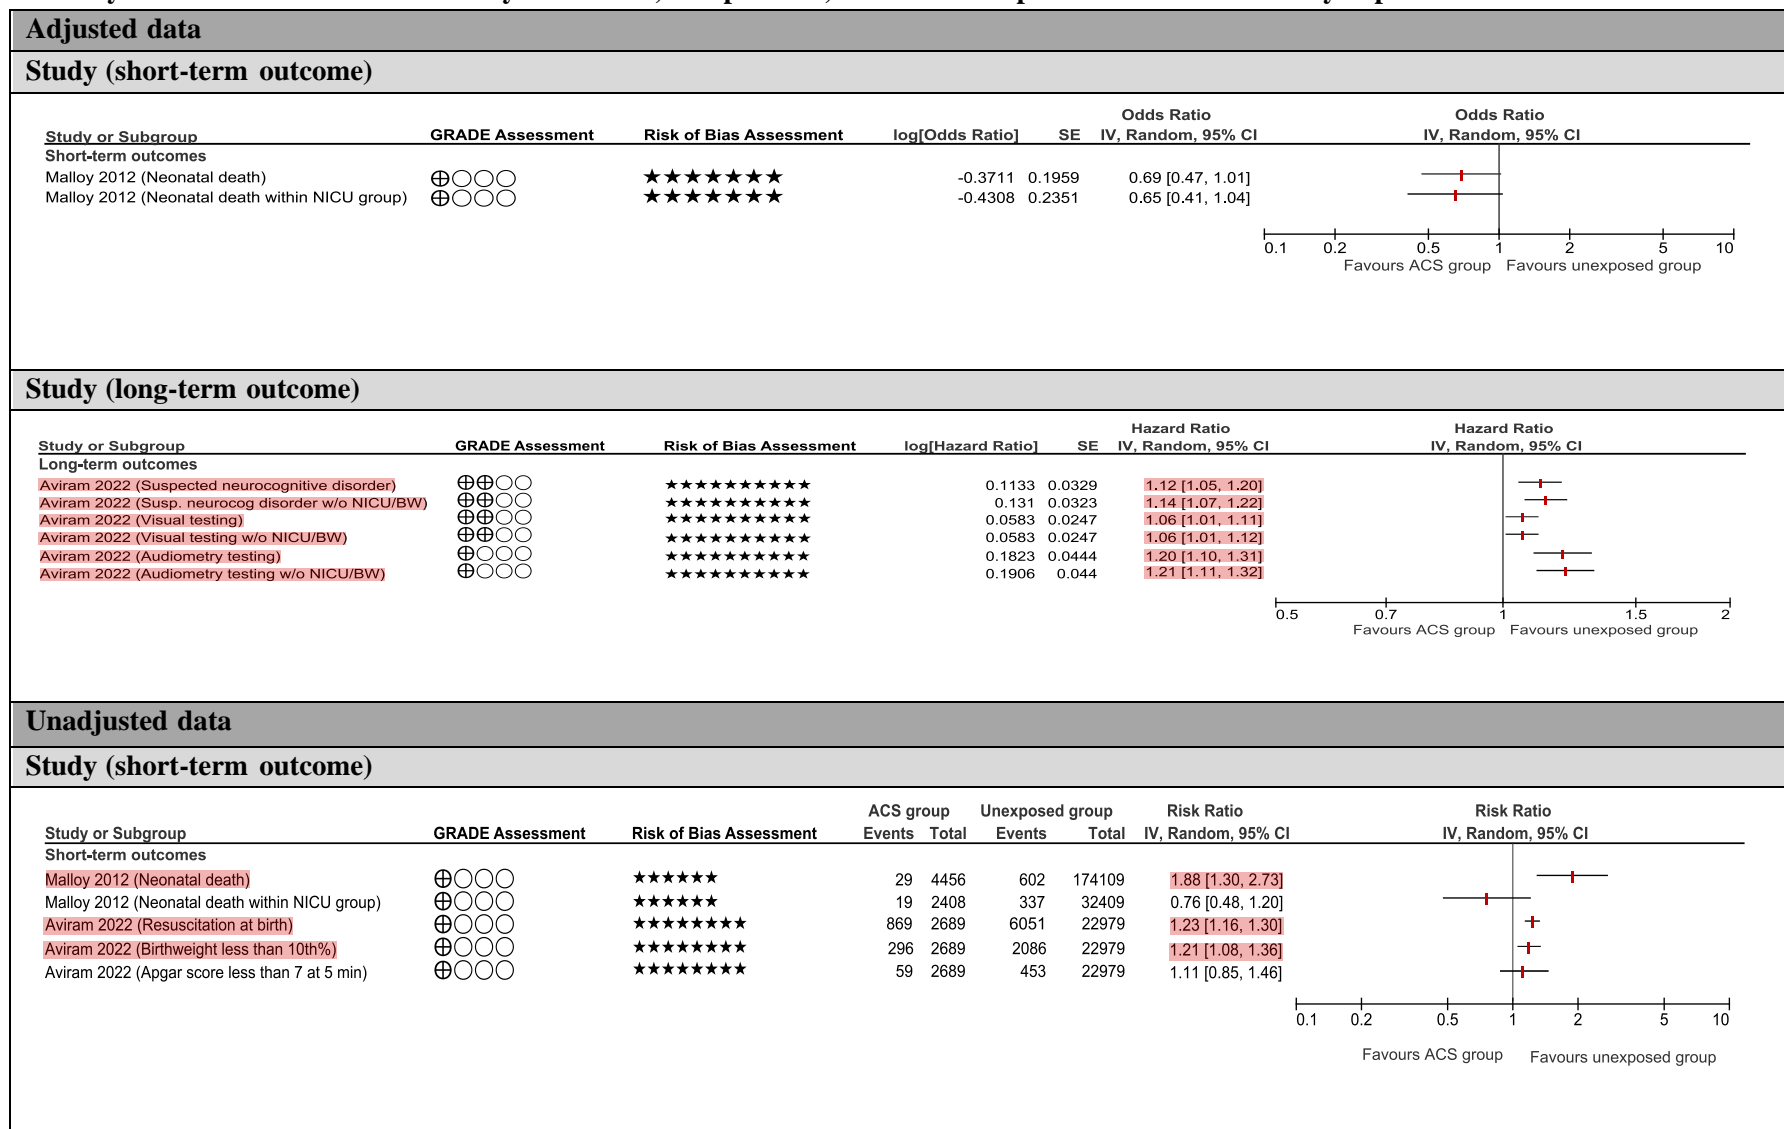

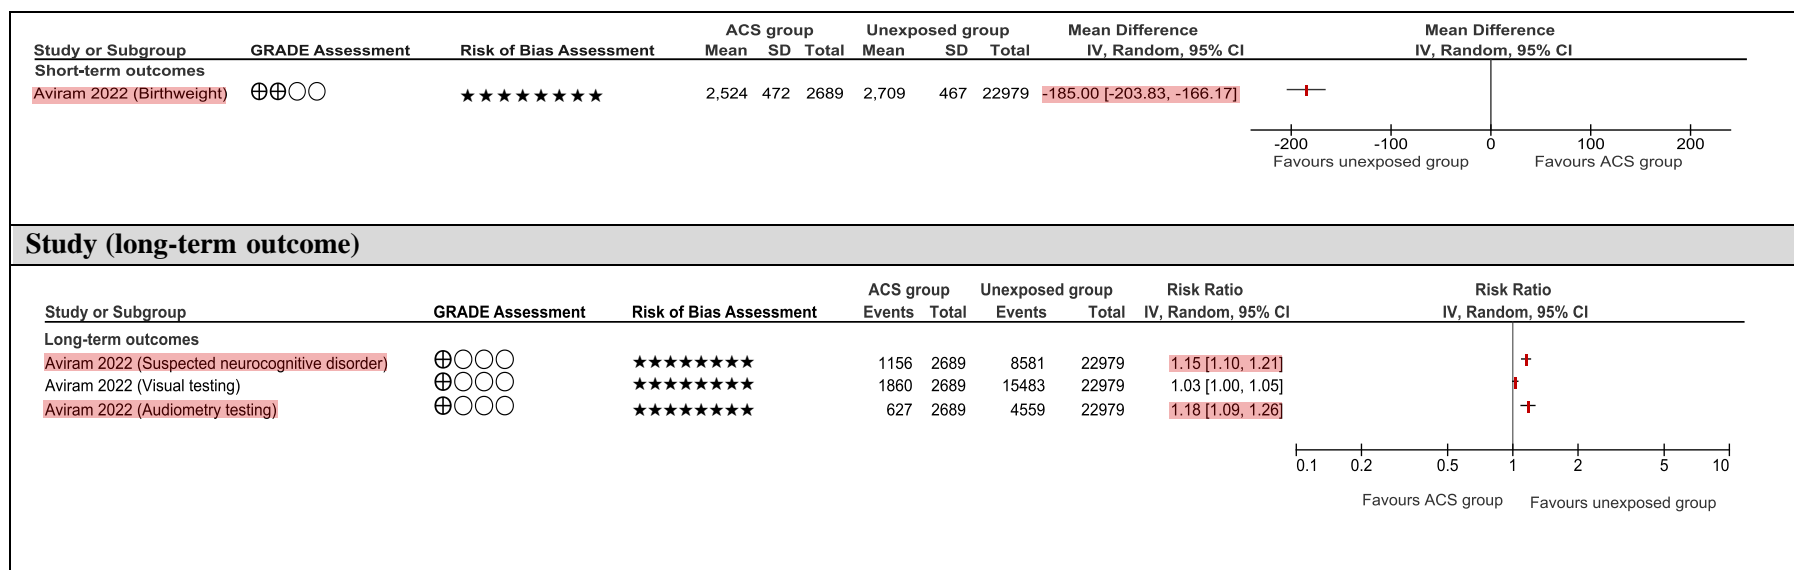

**Legend:**

ACS – antenatal corticosteroids; BW – birthweight; CI – confidence interval; IV – inverse variance; min – minutes; NICU – neonatal intensive care unit; **red highlighting** – statistically significant association with adverse outcome; SE – standard error; susp. neurocog – suspected neurocognitive; w/o – without

Newcastle-Ottawa Scale: ★ – point awarded; a maximum of 12 points could be awarded when assessing risk of bias for short-term outcomes, a maximum of 13 points could be awarded when assessing risk of bias for long-term outcomes.

GRADE Assessment: ⊕○○○ – very low certainty; ⊕⊕○○ – low certainty

**eFigure 4: Pooled secondary outcomes for infants born late preterm from population-based studies in a systematic review and meta-analysis on term, late preterm, and term/late preterm births after early exposure to antenatal corticosteroids**

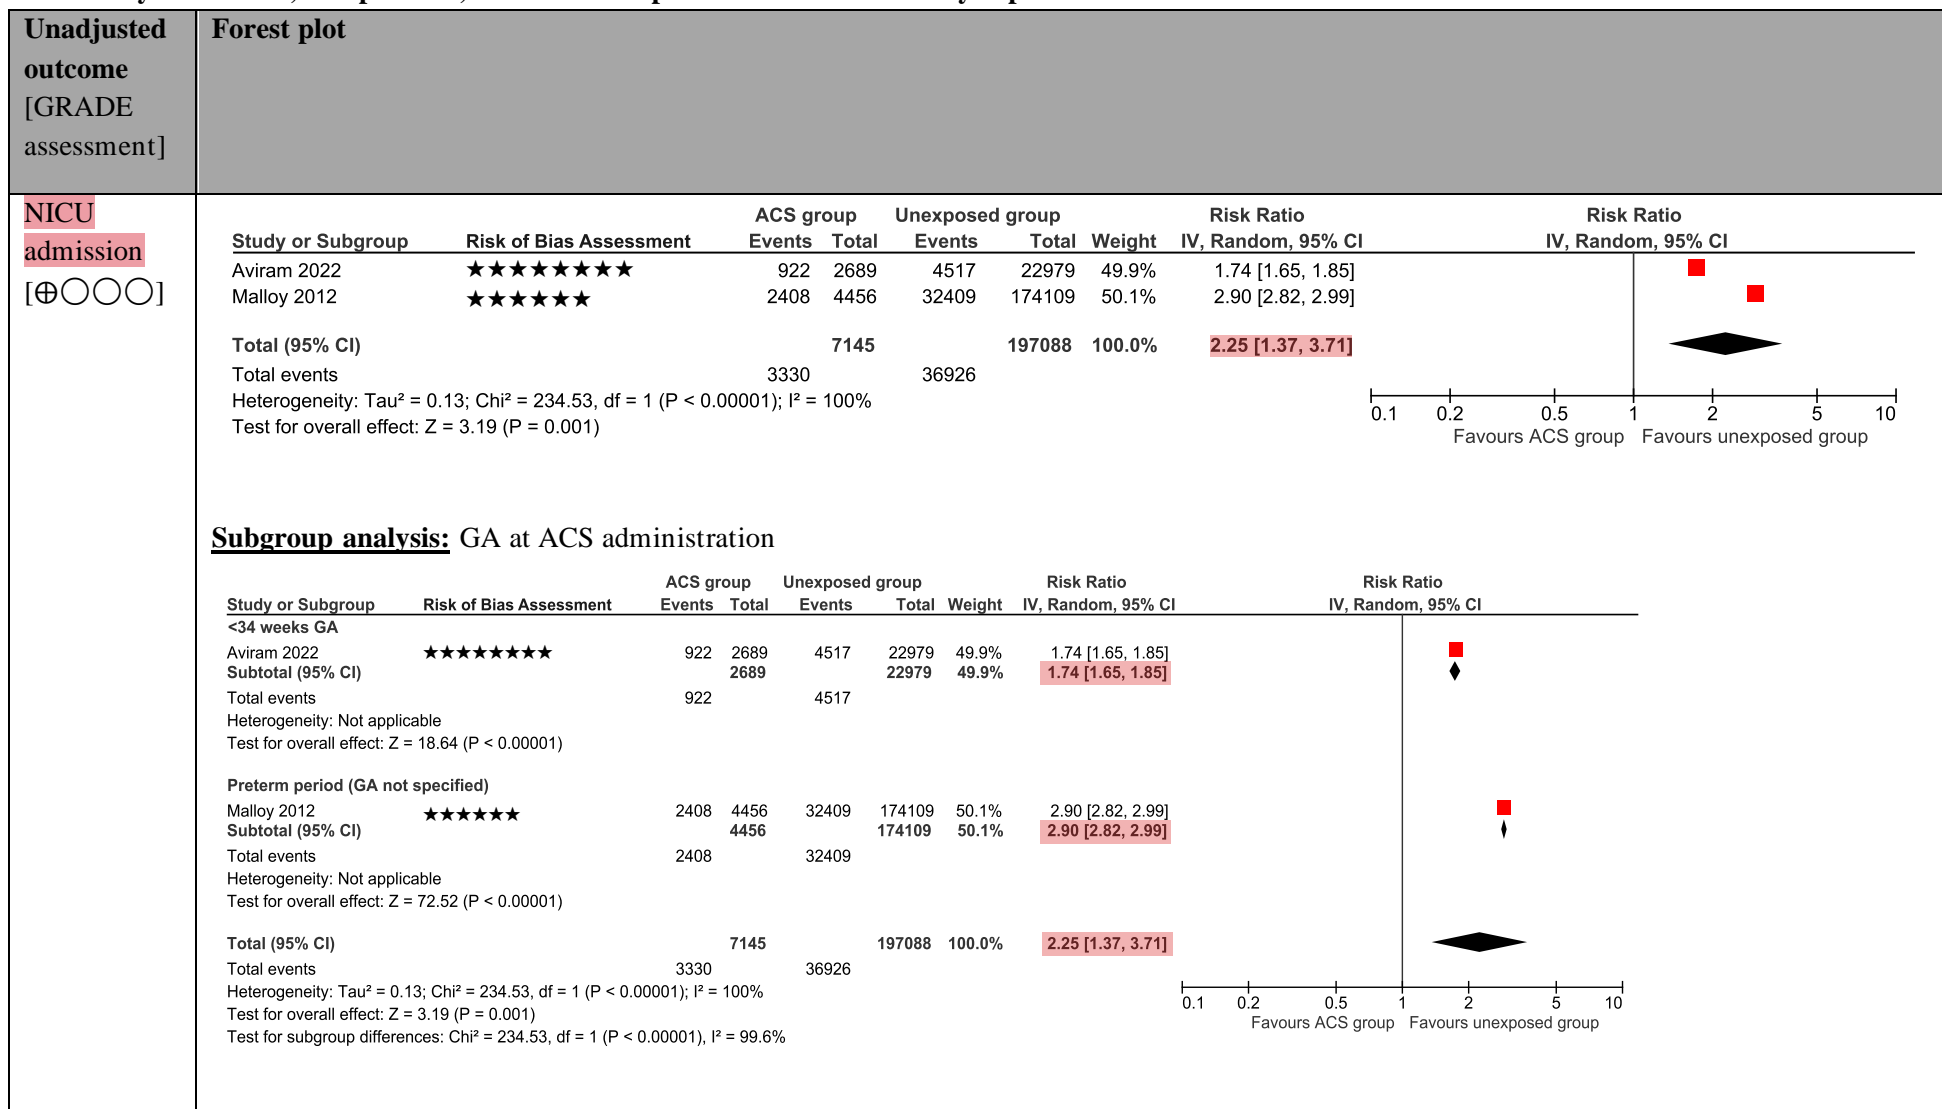

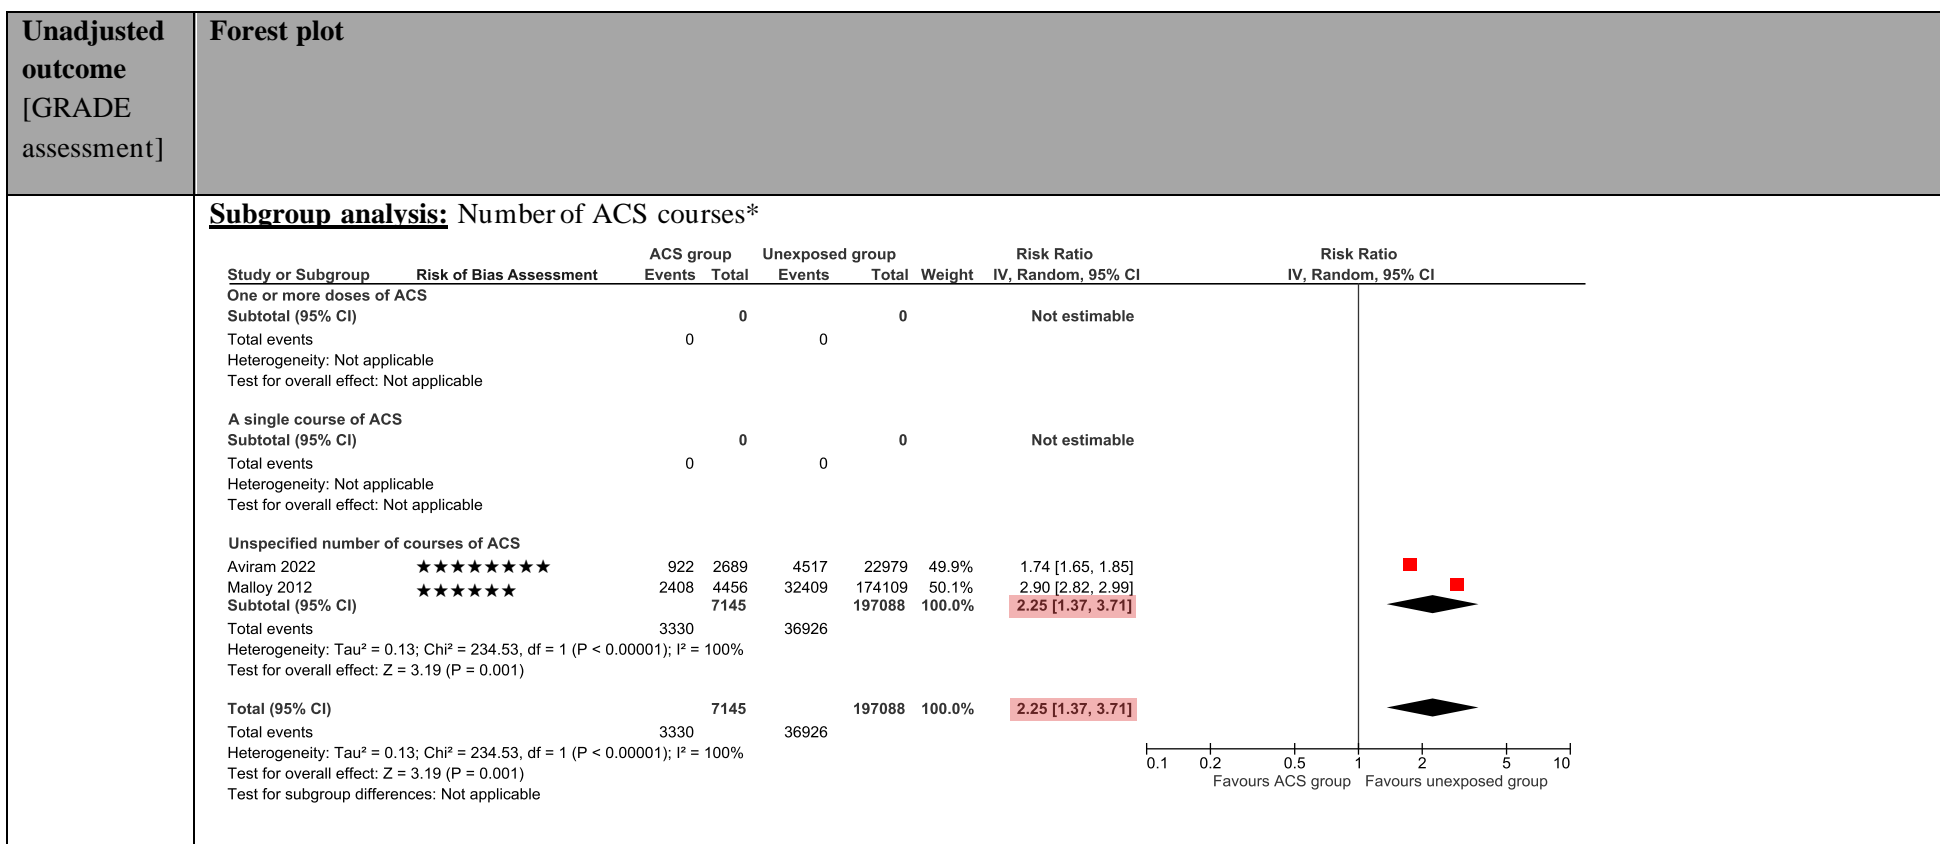

**Legend:**

ACS – antenatal corticosteroids; CI – confidence interval; df – degrees of freedom; GA – gestational age; IV – inverse variance; NICU – neonatal intensive care unit; **Red highlighting** – statistically significant association with adverse outcome

Newcastle-Ottawa Scale: ★ – point awarded; a maximum of 12 points could be awarded when assessing risk of bias for short-term outcomes.

GRADE Assessment: ⊕○○○ – very low certainty

\*The subgroup of "unspecified number of courses of ACS" were likely a single course based on clinical guidelines

**eFigure 5: Adjusted and unadjusted analyses of secondary outcomes for infants born at term/late preterm (combined) from population-based studies in a systematic review and meta-analysis on term, late preterm, and term/late preterm births after early exposure to antenatal corticosteroids (a post-hoc analysis)**

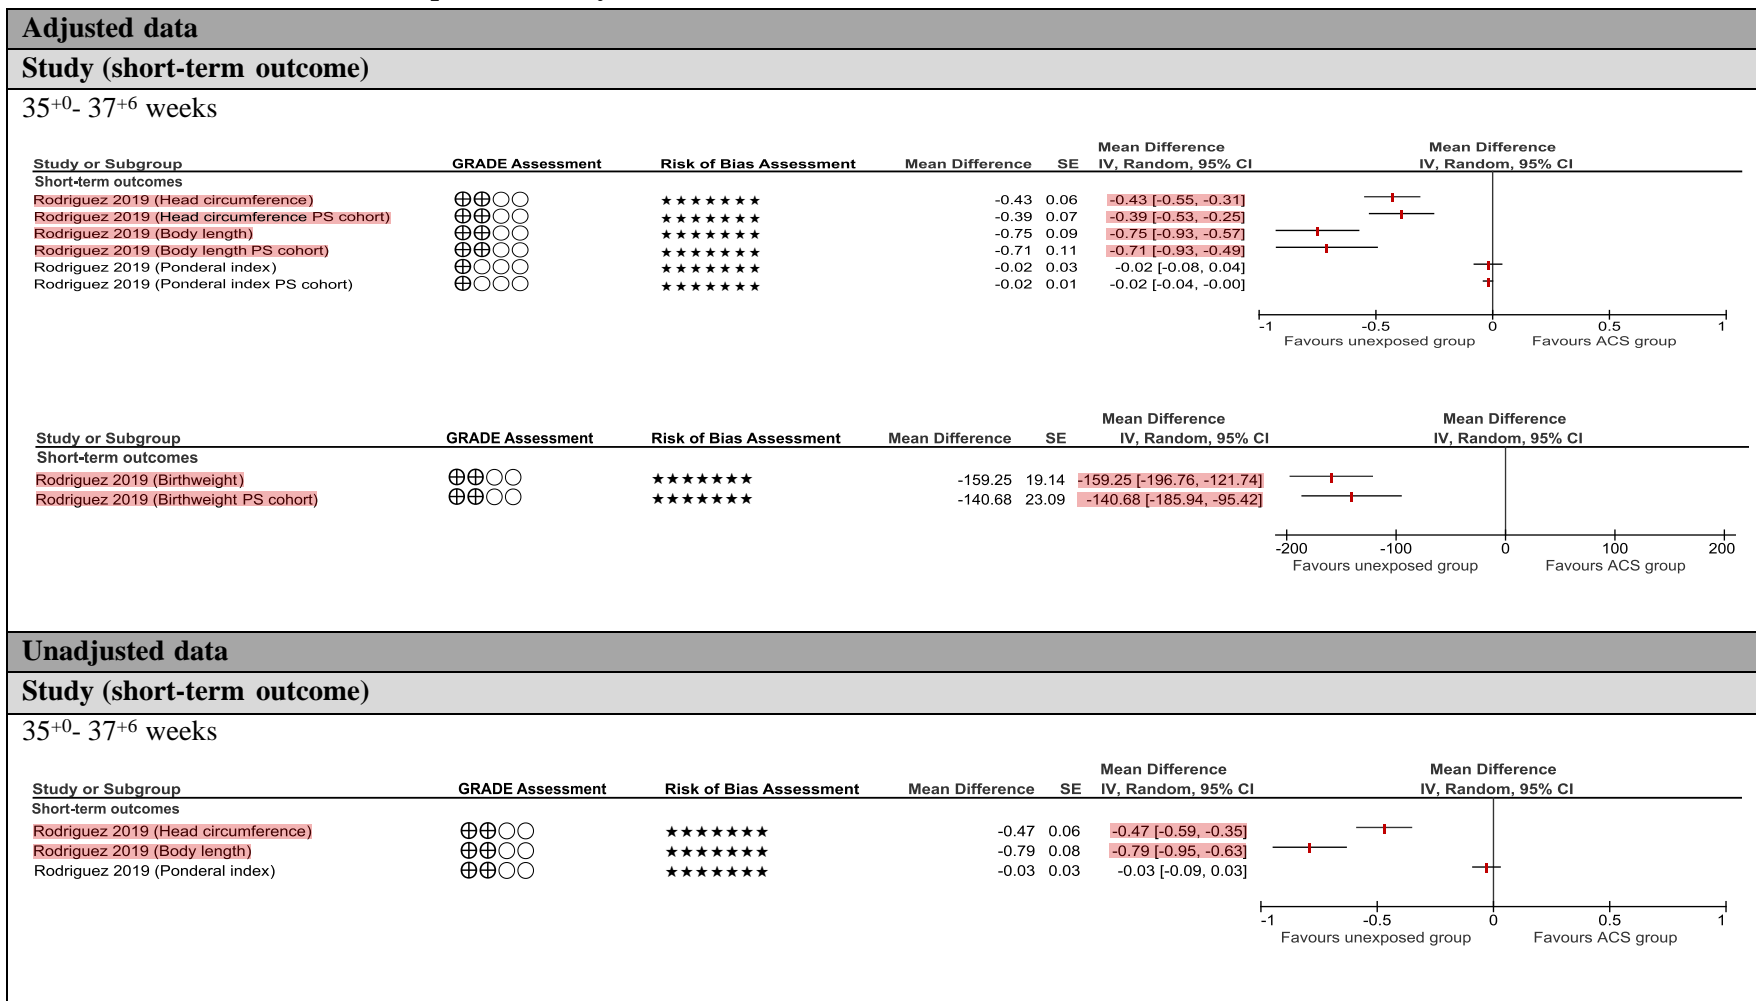

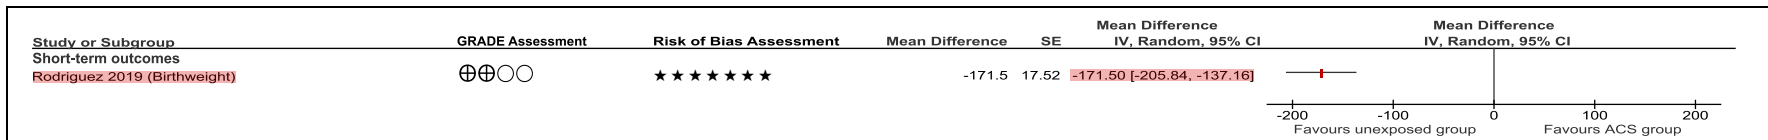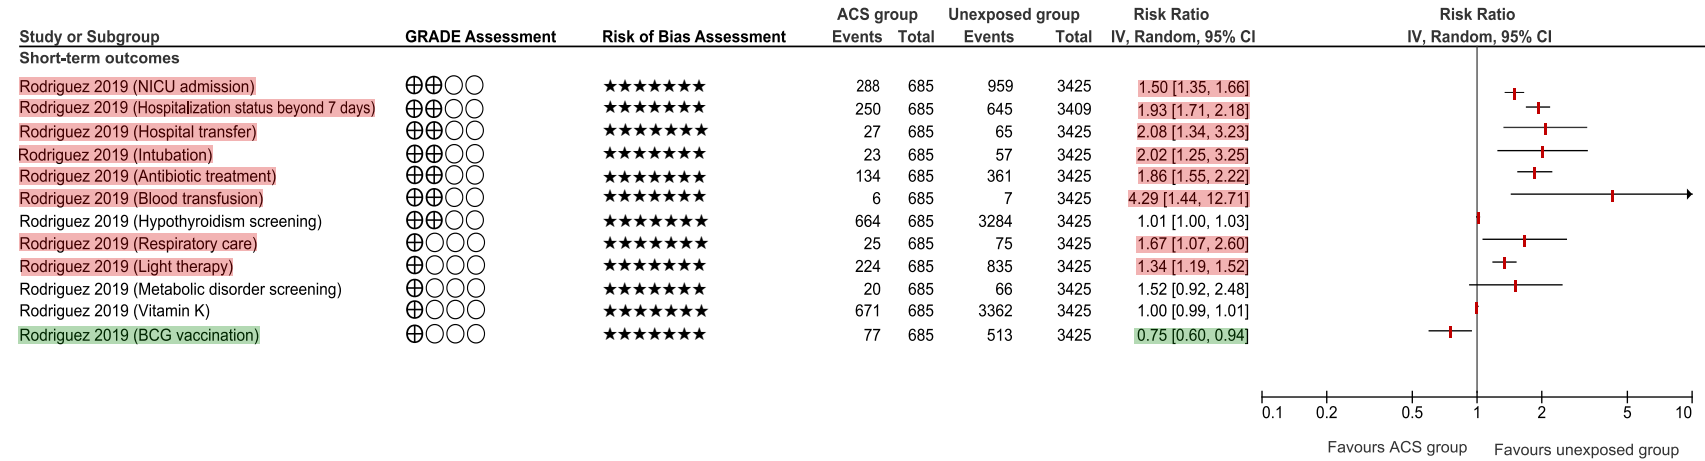

≥35 weeks

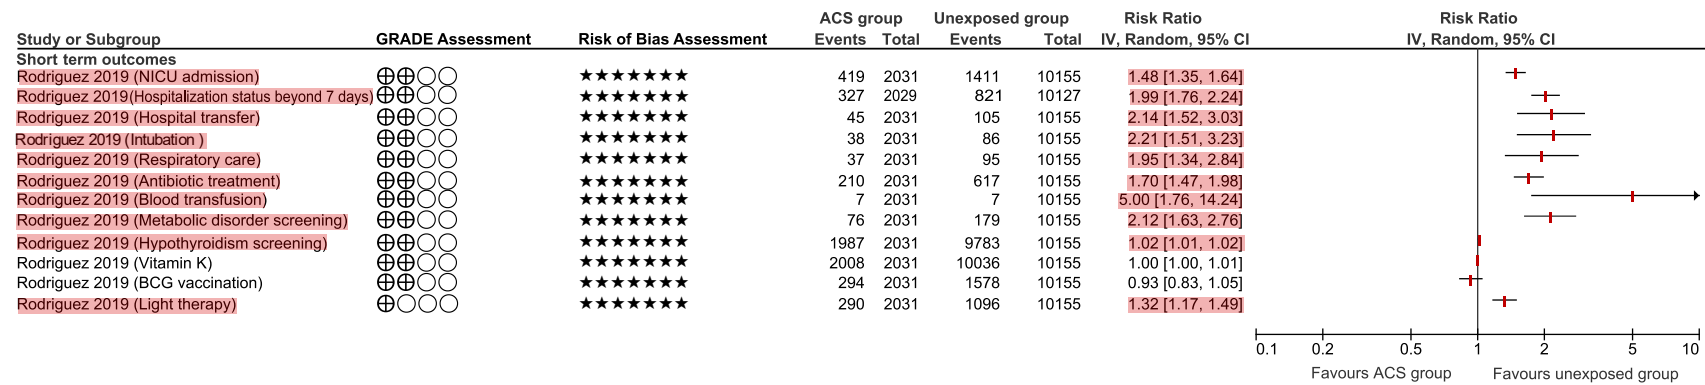



**Legend:**

ACS – antenatal corticosteroids; BCG – Bacille Calmette-Guérin; CI – confidence interval; **green highlighting** – statistically significant benefit; IV – inverse variance; NICU – neonatal intensive care unit; PS – propensity score; **red highlighting** – statistically significant association with adverse outcome; SE – standard error

Newcastle-Ottawa Scale: ★ – point awarded; a maximum of 12 points could be awarded when assessing risk of bias for short-term outcomes

GRADE Assessment: ⊕○○○ – very low certainty; ⊕⊕○○ – low certainty











|    |                                                                                                                                                                                                                       |             |
|----|-----------------------------------------------------------------------------------------------------------------------------------------------------------------------------------------------------------------------|-------------|
| 27 | ((single or double or triple) adj (blind* or mask*)).mp.                                                                                                                                                              | 260363      |
| 28 | (clinical trial, phase i or clinical trial, phase ii or clinical trial, phase iii or clinical trial, phase iv or controlled clinical trial or randomized controlled trial or multicenter study or clinical trial).pt. | 1136655     |
| 29 | (populat* adj2 (base* or analys* or cohort*)).mp.                                                                                                                                                                     | 187991      |
| 30 | ((multicentr* or nation* or provinc* or state*) adj2 (stud* or analys* or cohort)).mp.                                                                                                                                | 100926      |
| 31 | (health* adj2 database*).mp.                                                                                                                                                                                          | 11998       |
| 32 | (discharge* adj2 record*).mp.                                                                                                                                                                                         | 3748        |
| 33 | (birth* adj2 registr*).mp.                                                                                                                                                                                            | 3274        |
| 34 | exp cohort studies/                                                                                                                                                                                                   | 2379262     |
| 35 | Epidemiologic studies/                                                                                                                                                                                                | 9151        |
| 36 | (observational adj1 stud*).mp.                                                                                                                                                                                        | 229429      |
| 37 | (cohort adj3 (stud* or analys*)).mp.                                                                                                                                                                                  | 532427      |
| 38 | (follow up adj3 stud*).mp.                                                                                                                                                                                            | 728407      |
| 39 | (longitudinal or retrospective or prospective).mp.                                                                                                                                                                    | 2358784     |
| 40 | 19 or 20 or 21 or 22 or 23 or 24 or 25 or 26 or 27 or 28 or 29 or 30 or 31 or 32 or 33 or 34 or 35 or 36 or 37 or 38 or 39                                                                                            | 4692684     |
| 41 | (Animals/ or Models, Animal/ or Disease Models, Animal/) not Humans/                                                                                                                                                  | 5000299     |
| 42 | 10 and 18 and 40                                                                                                                                                                                                      | 3680        |
| 43 | 42 not 41                                                                                                                                                                                                             | 3504        |
| 44 | <b>limit 43 to yr="2000 -Current"</b>                                                                                                                                                                                 | <b>2940</b> |

**Database: Embase (January 1, 2000 – February 01, 2023)**

| #  | Search terms                                                                                                                                      | Results |
|----|---------------------------------------------------------------------------------------------------------------------------------------------------|---------|
| 1  | exp prematurity/                                                                                                                                  | 117547  |
| 2  | exp premature labor/                                                                                                                              | 52454   |
| 3  | term birth/                                                                                                                                       | 4149    |
| 4  | newborn/                                                                                                                                          | 575507  |
| 5  | exp pregnancy/ or exp high risk pregnancy/                                                                                                        | 738765  |
| 6  | pregnant woman/                                                                                                                                   | 100010  |
| 7  | pregnan*.mp.                                                                                                                                      | 1046407 |
| 8  | ((preterm or pre-term or prematur* or term) adj3 (infant* or birth* or child* or deliver* or newborn or labour or labor or born or neonate*)).mp. | 215355  |
| 9  | 1 or 2 or 3 or 4 or 5 or 6 or 7 or 8                                                                                                              | 1582088 |
| 10 | glucocorticoid/                                                                                                                                   | 96084   |
| 11 | (antenatal adj4 (cortico* or steroid*)).mp.                                                                                                       | 3970    |
| 12 | betamethasone/                                                                                                                                    | 18597   |
| 13 | dexamethasone/                                                                                                                                    | 173099  |
| 14 | betamethasone.mp.                                                                                                                                 | 25747   |
| 15 | celestone.mp.                                                                                                                                     | 974     |
| 16 | dexamethasone.mp.                                                                                                                                 | 189245  |
| 17 | 10 or 11 or 12 or 13 or 14 or 15 or 16                                                                                                            | 292140  |
| 18 | randomized controlled trial/                                                                                                                      | 720622  |
| 19 | exp randomization/                                                                                                                                | 94840   |
| 20 | clinical trial/                                                                                                                                   | 1040041 |
| 21 | placebo/                                                                                                                                          | 383339  |
| 22 | controlled clinical trial/                                                                                                                        | 466633  |
| 23 | multicenter study/                                                                                                                                | 331435  |
| 24 | RCT.mp.                                                                                                                                           | 50769   |
| 25 | (random* adj3 (control* or trial* or allocat* or assign*)).mp.                                                                                    | 1281379 |
| 26 | (clinical adj2 trial*).mp.                                                                                                                        | 1923754 |
| 27 | ((single or double or triple) adj (blind* or mask*)).mp.                                                                                          | 343038  |
| 28 | (populat* adj2 (base* or analys* or cohort*)).mp.                                                                                                 | 262244  |



|    |                                                                                                                      |             |
|----|----------------------------------------------------------------------------------------------------------------------|-------------|
| 29 | ((multicentr* or nation* or provinc* or state*) adj2 (stud* or analys* or cohort)).mp.                               | 143292      |
| 30 | (health* adj2 database*).mp.                                                                                         | 18984       |
| 31 | (discharge* adj2 record*).mp.                                                                                        | 5571        |
| 32 | (birth* adj2 registr*).mp.                                                                                           | 4153        |
| 33 | exp cohort analysis/ or exp birth cohort/                                                                            | 874913      |
| 34 | (observational adj1 stud*).mp.                                                                                       | 346199      |
| 35 | (cohort adj3 (stud* or analys*)).mp.                                                                                 | 998684      |
| 36 | (follow up adj3 stud*).mp.                                                                                           | 114090      |
| 37 | (longitudinal or retrospective or prospective).mp.                                                                   | 3104862     |
| 38 | 18 or 19 or 20 or 21 or 22 or 23 or 24 or 25 or 26 or 27 or 28 or 29 or 30 or 31 or 32 or 33 or 34 or 35 or 36 or 37 | 6138350     |
| 39 | (animal/ or animal model/) not Human/                                                                                | 2359478     |
| 40 | 9 and 17 and 38                                                                                                      | 6911        |
| 41 | 40 not 39                                                                                                            | 6773        |
| 42 | <b>limit 41 to yr="2000 -Current"</b>                                                                                | <b>6449</b> |

| <b>Database: APA PsychInfo (January 1, 2000 – February 01, 2023)</b> |                                                                                                                                                   |         |
|----------------------------------------------------------------------|---------------------------------------------------------------------------------------------------------------------------------------------------|---------|
| #                                                                    | Search terms                                                                                                                                      | Results |
| 1                                                                    | Premature Birth/                                                                                                                                  | 6215    |
| 2                                                                    | Birth/                                                                                                                                            | 8061    |
| 3                                                                    | exp Pregnancy/                                                                                                                                    | 46417   |
| 4                                                                    | pregnan*.mp.                                                                                                                                      | 72141   |
| 5                                                                    | ((preterm or pre-term or prematur* or term) adj3 (infant* or birth* or child* or deliver* or newborn or labour or labor or born or neonate*)).mp. | 17011   |
| 6                                                                    | 1 or 2 or 3 or 4 or 5                                                                                                                             | 91845   |
| 7                                                                    | Glucocorticoids/                                                                                                                                  | 3318    |
| 8                                                                    | (antenatal adj4 (cortico* or steroid*)).mp.                                                                                                       | 75      |
| 9                                                                    | Corticosteroids/                                                                                                                                  | 1538    |
| 10                                                                   | Dexamethasone/                                                                                                                                    | 1269    |
| 11                                                                   | betamethasone.mp.                                                                                                                                 | 85      |
| 12                                                                   | celestone.mp.                                                                                                                                     | 3       |

|    |                                                                                              |            |
|----|----------------------------------------------------------------------------------------------|------------|
| 13 | dexamethasone.mp.                                                                            | 4211       |
| 14 | 7 or 8 or 9 or 10 or 11 or 12 or 13                                                          | 8255       |
| 15 | exp Randomized Controlled Trials/                                                            | 1241       |
| 16 | exp Clinical Trials/                                                                         | 13293      |
| 17 | Placebo/                                                                                     | 6290       |
| 18 | RCT.mp.                                                                                      | 6078       |
| 19 | (random* adj3 (control* or trial* or allocat* or assign*)).mp.                               | 124281     |
| 20 | (clinical adj2 trial*).mp.                                                                   | 51805      |
| 21 | ((single or double or triple) adj (blind* or mask*)).mp.                                     | 36046      |
| 22 | (populat* adj2 (base* or analys* or cohort*)).mp.                                            | 28124      |
| 23 | ((multicentr* or nation* or provinc* or state*) adj2 (stud* or analys* or cohort)).mp.       | 31976      |
| 24 | (health* adj2 database*).mp.                                                                 | 15273      |
| 25 | (discharge* adj2 record*).mp.                                                                | 478        |
| 26 | (birth* adj2 registr*).mp.                                                                   | 262        |
| 27 | (observational adj1 stud*).mp.                                                               | 12883      |
| 28 | (cohort adj3 (stud* or analys*)).mp.                                                         | 52826      |
| 29 | (follow up adj3 stud*).mp.                                                                   | 61155      |
| 30 | (longitudinal or retrospective or prospective).mp.                                           | 269486     |
| 31 | 15 or 16 or 17 or 18 or 19 or 20 or 21 or 22 or 23 or 24 or 25 or 26 or 27 or 28 or 29 or 30 | 546682     |
| 32 | 6 and 14 and 31                                                                              | 121        |
| 33 | <b>limit 32 to yr="2000 -Current"</b>                                                        | <b>120</b> |

| <b>Database: Web of Science (January 1, 2000 – February 01, 2023)</b> |                                                                                                                                                      |                |
|-----------------------------------------------------------------------|------------------------------------------------------------------------------------------------------------------------------------------------------|----------------|
| <b>#</b>                                                              | <b>Search terms</b>                                                                                                                                  | <b>Results</b> |
| #1                                                                    | TS=(((preterm or pre-term or prematur* or term) NEAR/3 (infant* or birth* or child* or deliver* or newborn or labour or labor or born or neonate*))) | 182513         |
| #2                                                                    | TS=(pregnan*)                                                                                                                                        | 567749         |
| #3                                                                    | #1 OR #2                                                                                                                                             | 701877         |
| #4                                                                    | TS=(((antenatal*) NEAR/4 (cortico* or steroid*)))                                                                                                    | 3105           |
| #5                                                                    | TS=(glucocorticoid*)                                                                                                                                 | 95354          |

|     |                                                                                           |             |
|-----|-------------------------------------------------------------------------------------------|-------------|
| #6  | TS=(betamethasone)                                                                        | 5691        |
| #7  | TS=(celestone)                                                                            | 42          |
| #8  | TS=(dexamethasone)                                                                        | 74068       |
| #9  | #4 OR #5 OR #6 OR #7 OR #8                                                                | 159294      |
| #10 | TS=(((random*) NEAR/3 (control* or trial* or allocat* or assign*)))                       | 849793      |
| #11 | TS=(RCT)                                                                                  | 31534       |
| #12 | TS=(((clinical) NEAR/2 (trial*)))                                                         | 508128      |
| #13 | TS=(((single or double or triple) NEXT (blind* or mask*)))                                | 4667        |
| #14 | TS=(((populat*) NEAR/2 (base* or analys* or cohort*)))                                    | 256729      |
| #15 | TS=(((multicentr* or nation* or provinc* or state*) NEAR/2 (stud* or analys* or cohort))) | 281065      |
| #16 | TS=(((health) NEAR/2 (database*)))                                                        | 19667       |
| #17 | TS=(((discharge*) NEAR/2 (record*)))                                                      | 5316        |
| #18 | TS=(((birth*) NEAR/2 (registr*)))                                                         | 3278        |
| #19 | TS=(((cohort) NEAR/3 (stud* or analys*)))                                                 | 376828      |
| #20 | TS=(((follow up) NEAR/3 (stud*)))                                                         | 97150       |
| #21 | TS=((longitudinal or retrospective or prospective))                                       | 1790093     |
| #22 | #21 OR #20 OR #19 OR #18 OR #17 OR #16 OR #15 OR #14 OR #13 OR #12 OR #11 OR #10          | 3415982     |
| #23 | <b>#22 AND #9 AND #3</b><br><b>Timespan: 2000-01-01 to 2023-02-1 (Publication date)</b>   | <b>2245</b> |

| <b>Database: Cochrane CENTRAL (January 1, 2000 – February 01, 2023)</b> |                                                                                                                                                                                      |                |
|-------------------------------------------------------------------------|--------------------------------------------------------------------------------------------------------------------------------------------------------------------------------------|----------------|
| <b>#</b>                                                                | <b>Search terms</b>                                                                                                                                                                  | <b>Results</b> |
| #1                                                                      | MeSH descriptor: [Premature Birth] this term only                                                                                                                                    | 1771           |
| #2                                                                      | MeSH descriptor: [Infant, Premature] explode all trees                                                                                                                               | 4247           |
| #3                                                                      | MeSH descriptor: [Obstetric Labor, Premature] this term only                                                                                                                         | 837            |
| #4                                                                      | MeSH descriptor: [Term Birth] this term only                                                                                                                                         | 177            |
| #5                                                                      | MeSH descriptor: [Pregnancy] explode all trees                                                                                                                                       | 24735          |
| #6                                                                      | (pregnan*):ti,ab,kw (Word variations have been searched)                                                                                                                             | 74794          |
| #7                                                                      | ((((preterm or pre-term or prematur* or term) NEAR/2 (infant* or birth* or child* or deliver* or newborn or labour or labor or born))):ti,ab,kw (Word variations have been searched) | 25202          |
| #8                                                                      | #1 or #2 or #3 or #4 or #5 or #6 or #7                                                                                                                                               | 92362          |
| #9                                                                      | MeSH descriptor: [Glucocorticoids] this term only                                                                                                                                    | 4805           |
| #10                                                                     | ((antenatal NEAR/4 (cortico* or steroid*)) (Word variations have been searched)                                                                                                      | 614            |
| #11                                                                     | MeSH descriptor: [Betamethasone] this term only                                                                                                                                      | 1149           |
| #12                                                                     | MeSH descriptor: [Dexamethasone] this term only                                                                                                                                      | 5050           |
| #13                                                                     | (betamethasone):ti,ab,kw (Word variations have been searched)                                                                                                                        | 2624           |
| #14                                                                     | (celestone):ti,ab,kw (Word variations have been searched)                                                                                                                            | 59             |
| #15                                                                     | (dexamethasone):ti,ab,kw (Word variations have been searched)                                                                                                                        | 13706          |
| #16                                                                     | #9 or #10 or #11 or #12 or #13 or #14 or #15                                                                                                                                         | 20238          |
| <b>#17</b>                                                              | <b>#8 and #16 with Publication Year from 2000 to 2023, in Trials</b>                                                                                                                 | <b>1204</b>    |

| <b>Database: CINAHL (January 2000- February 01, 2023)</b> |                                                                                                                            |                |
|-----------------------------------------------------------|----------------------------------------------------------------------------------------------------------------------------|----------------|
| <b>#</b>                                                  | <b>Search terms</b>                                                                                                        | <b>Results</b> |
| S38                                                       | S10 AND S18 AND S37 Limiters - Published Date: 20000101-20230201                                                           | 1,500          |
| S37                                                       | S19 OR S20 OR S21 OR S22 OR S23 OR S24 OR S25 OR S26 OR S27 OR S28 OR S29 OR S30 OR S31 OR S32 OR S33 OR S34 OR S35 OR S36 | 2,596,943      |
| S36                                                       | TX (longitudinal or retrospective or prospective)                                                                          | 934,856        |
| S35                                                       | TX ((follow up) N3 (stud*))                                                                                                | 28,136         |
| S34                                                       | TX ((cohort) N3 (stud* or analys*))                                                                                        | 151,787        |
| S33                                                       | TX ((observational N1 (stud*))                                                                                             | 67,553         |
| S32                                                       | (MH "Prospective Studies")                                                                                                 | 505,247        |
| S31                                                       | TX (birth* N2 registr*)                                                                                                    | 1,328          |
| S30                                                       | TX (discharge* N2 record*)                                                                                                 | 1,596          |
| S29                                                       | TX (health* N2 database*)                                                                                                  | 20,751         |
| S28                                                       | TX ((multicentr* or nation* or provinc* or state*) N2 (stud* or analys* or cohort))                                        | 75,420         |
| S27                                                       | TX ((populat*) N2 (base* or analys* or cohort*))                                                                           | 74,038         |
| S26                                                       | TX ((single or double or triple) N1 (blind* or mask*))                                                                     | 1,232,314      |
| S25                                                       | TX ((random*) N3 (control* or trial* or allocat* or assign*))                                                              | 356,396        |
| S24                                                       | TX RCT                                                                                                                     | 27,748         |
| S23                                                       | (MH "Placebos")                                                                                                            | 13,390         |
| S22                                                       | (MH "Multicenter Studies")                                                                                                 | 344,583        |
| S21                                                       | (MH "Random Assignment")                                                                                                   | 74,831         |
| S20                                                       | (MH "Clinical Trials+")                                                                                                    | 339,921        |
| S19                                                       | (MH "Randomized Controlled Trials+")                                                                                       | 130,760        |
| S18                                                       | S11 OR S12 OR S13 OR S14 OR S15 OR S16 OR S17                                                                              | 20,729         |
| S17                                                       | TX (Antenatal* N4 (cortico* or steroid*))                                                                                  | 1,302          |

|     |                                                                                                                                                |         |
|-----|------------------------------------------------------------------------------------------------------------------------------------------------|---------|
| S16 | TX dexamethasone                                                                                                                               | 9,811   |
| S15 | TX celestone                                                                                                                                   | 19      |
| S14 | TX betamethasone                                                                                                                               | 1,174   |
| S13 | (MH “Dexamethasone”)                                                                                                                           | 6,423   |
| S12 | (MH “Betamethasone”)                                                                                                                           | 806     |
| S11 | (MH “Glucocorticoids”)                                                                                                                         | 10,400  |
| S10 | S1 OR S2 OR S3 OR S4 OR S5 OR S6 OR S7 OR S8 OR S9                                                                                             | 411,760 |
| S9  | TX pregnan*                                                                                                                                    | 278,584 |
| S8  | TX ((preterm or pre-term or prematur* or term) N3 (infant* or birth* or child* or deliver* or newborn or labour or labor or born or neonate*)) | 73,586  |
| S7  | (MH “Labor, Premature”)                                                                                                                        | 3,572   |
| S6  | (MH “Pregnancy+”)                                                                                                                              | 237,463 |
| S5  | (MH “Infant, Newborn+”)                                                                                                                        | 153,178 |
| S4  | (MH “Term Birth”)                                                                                                                              | 1,333   |
| S3  | (MH “Infant, High Risk”)                                                                                                                       | 607     |
| S2  | (MH “Infant, Premature”)                                                                                                                       | 25,810  |
| S1  | (MH “Childbirth, Premature”)                                                                                                                   | 12,637  |

| Database: clinicaltrials.gov (Sept 2008- February 01, 2023)                                                                                             |           |
|---------------------------------------------------------------------------------------------------------------------------------------------------------|-----------|
| Search terms                                                                                                                                            | Results   |
| (preterm OR pre-term OR premature OR Prenatal or term) AND (glucocorticoids OR antenatal steroids OR corticosteroids OR betamethasone OR dexamethasone) | <b>53</b> |
| With applied filter: <b>With Results</b>                                                                                                                |           |

| <b>Database: Google Scholar (January 1, 2000 – February 01, 2023)</b>                                                                                  |                          |
|--------------------------------------------------------------------------------------------------------------------------------------------------------|--------------------------|
| <b>Search terms</b>                                                                                                                                    | <b>Results</b>           |
| (preterm OR pre-term OR premature OR prenatal or term) AND (glucocorticoids OR antenatal steroids OR corticosteroid OR betamethasone OR dexamethasone) | <b>First 275 results</b> |

**eAppendix 2: Excluded studies from a systematic review and meta-analysis on term, late preterm, and term/late preterm births after early exposure to antenatal corticosteroids**

| Reference <sup>a</sup>                                                                                                                                                                                                                                             | Reason(s) for exclusion                                                                        |
|--------------------------------------------------------------------------------------------------------------------------------------------------------------------------------------------------------------------------------------------------------------------|------------------------------------------------------------------------------------------------|
| Battarbee AN, Sandoval G, Grobman WA, et al. Antenatal Corticosteroids and Preterm Neonatal Morbidity and Mortality among Women with and without Diabetes in Pregnancy. <i>Am J Perinatol.</i> 2022;39(1):67-74.                                                   | Wrong population of interest (i.e., does not include infants born late preterm and/or at term) |
| Chen X, Lu T, Gould J, et al. Active Treatment of Infants Born at 22-25 Weeks of Gestation in California, 2011-2018. <i>J Pediatr.</i> 2022;15:15.                                                                                                                 | Wrong population of interest (i.e., does not include infants born late preterm and/or at term) |
| Darlow BA, Harris SL, Horwood LJ. Little evidence for long-term harm from antenatal corticosteroids in a population-based very low birthweight young adult cohort. <i>Paediatr Perinat Epidemiol.</i> 2022;16:16.                                                  | Wrong population of interest (i.e., does not include infants born late preterm and/or at term) |
| Fortmann I, Mertens L, Boeckel H, et al. A Timely Administration of Antenatal Steroids Is Highly Protective Against Intraventricular Hemorrhage: An Observational Multicenter Cohort Study of Very Low Birth Weight Infants. <i>Front Pediatr.</i> 2022;10:721355. | Wrong population of interest (i.e., does not include infants born late preterm and/or at term) |
| Kochukhova O, Fredriksson Kaul Y, Johansson M, et al. Antenatal steroids and neurodevelopment in 12-year-old children born extremely preterm. <i>Acta Paediatr.</i> 2022;111(2):314-322.                                                                           | Wrong population of interest (i.e., does not include infants born late preterm and/or at term) |
| Mwita S, Kamala BA, Konje E, et al. Association between antenatal corticosteroids use and perinatal mortality among preterm singletons and twins in Mwanza, Tanzania: an observational study. <i>BMJ Open.</i> 2022;12(4):e059030.                                 | Wrong population of interest (i.e., does not include infants born late preterm and/or at term) |
| Norman M, Nilsson D, Trygg J, Hakansson S. Perinatal risk factors for mortality in very preterm infants-A nationwide, population-based discriminant analysis. <i>Acta Paediatr.</i> 2022;111(8):1526-1535.                                                         | Wrong population of interest (i.e., does not include infants born late preterm and/or at term) |
| Razem K, Tul N, Blickstein I, Trojner Bregar A. The effect of antenatal corticosteroids on small-for-gestational age preterm neonates. <i>J Matern Fetal Neonatal Med.</i> 2022;35(2):362-365.                                                                     | Wrong population of interest (i.e., does not include infants born late preterm and/or at term) |
| Shiple L, Hyliger G, Sharkey D. Temporal trends of in utero and early postnatal transfer of extremely preterm infants between 2011 and 2016: a UK population study. <i>Arch Dis Child Fetal Neonatal Ed.</i> 2022;107(2):201-205.                                  | Wrong population of interest (i.e., does not include infants born late preterm and/or at term) |



|                                                                                                                                                                                                                                                                                                     |                                                                                                                                                 |
|-----------------------------------------------------------------------------------------------------------------------------------------------------------------------------------------------------------------------------------------------------------------------------------------------------|-------------------------------------------------------------------------------------------------------------------------------------------------|
| Verhaeghe C, Marchand-Martin L, Kaminski M, et al. Neurodevelopment at 5 years of age for preterm-born children according to mode of conception: a cohort study. <i>Am J Obstet Gynecol.</i> 2022;06:06.                                                                                            | Wrong population of interest (i.e., does not include infants born late preterm and/or at term)                                                  |
| Yang J, Epton MJ, Harris SL, et al. Reduced Exercise Capacity in Adults Born at Very Low Birth Weight: A Population-based Cohort Study. <i>Am J Respir Crit Care Med.</i> 2022;205(1):88-98.                                                                                                        | Wrong population of interest (i.e., does not include infants born late preterm and/or at term)                                                  |
| Yum SK, Lee JH. Dose completion of antenatal corticosteroids and neonatal outcomes in non-small-for-gestational age or small-for-gestational age very-low-birthweight infants: A Korean population-based cohort study. <i>Pediatr Neonatol.</i> 2022;63(2):165-171.                                 | Wrong population of interest (i.e., does not include infants born late preterm and/or at term)                                                  |
| Jing J, Dai Y, Li Y, Zhou P, Li X, Mei J, et al. Single-course antenatal corticosteroids is related to faster growth in very-low-birth-weight infant. <i>BMC Pregnancy Childbirth.</i> 2021;21(1):50.                                                                                               | Wrong population of interest (i.e., does not include all infants born late preterm and/or at term in an entire area or a representative sample) |
| Konzett K, Riedl D, Stark C, Simma B. Chorioamnionitis and neurodevelopmental outcome in very preterm infants from 2007 to 2017-a population-based study. <i>Acta Paediatr.</i> 2021;110(4):1201-1208.                                                                                              | Wrong population of interest (i.e., does not include infants born late preterm and/or at term)                                                  |
| Kusuda S, Bennett M, Gould J, Neonatal Research Network of J, the California Perinatal Quality Care C. Outcomes of Infants with Very Low Birth Weight Associated with Birthplace Difference: A Retrospective Cohort Study of Births in Japan and California. <i>J Pediatr.</i> 2021;229:182-190.e6. | Wrong population of interest (i.e., does not include infants born late preterm and/or at term)                                                  |
| Melamed N, Murphy K, Barrett J, et al. Benefit of antenatal corticosteroids by year of birth among preterm infants in Canada during 2003-2017: a population-based cohort study. <i>BJOG.</i> 2021;128(3):521-531.                                                                                   | Wrong population of interest (i.e., does not include infants born late preterm and/or at term)                                                  |
| Mwita S, Konje E, Kamala B, et al. Association between antenatal corticosteroid use and perinatal mortality among preterm births in hospitals in Tanzania. <i>PLoS ONE.</i> 2021;16(7):e0254916.                                                                                                    | Wrong population of interest (i.e., does not include infants born late preterm and/or at term)                                                  |
| Nabwera HM, Wang D, Tongo OO, et al. Burden of disease and risk factors for mortality amongst hospitalized newborns in Nigeria and Kenya. <i>PLoS One.</i> 2021;16:e0244109.                                                                                                                        | Wrong population of interest (i.e., does not include all infants born late preterm and/or at term in an entire area or a representative sample) |

|                                                                                                                                                                                                                                                                                        |                                                                                                                                                 |
|----------------------------------------------------------------------------------------------------------------------------------------------------------------------------------------------------------------------------------------------------------------------------------------|-------------------------------------------------------------------------------------------------------------------------------------------------|
| Pan S, Jiang S, Lin S, Lee SK, Cao Y, Lin Z. Outcome of very preterm infants delivered outside tertiary perinatal centers in China: a multi-center cohort study. <i>Transl Pediatr.</i> 2021;10(2):306-314.                                                                            | Wrong population of interest (i.e., does not include infants born late preterm and/or at term)                                                  |
| Rossi RM, Defranco EA, Hall ES. Association of Antenatal Corticosteroid Exposure and Infant Survival at 22 and 23 Weeks. <i>Am J Perinatol.</i> 2021.                                                                                                                                  | Wrong population of interest (i.e., does not include infants born late preterm and/or at term)                                                  |
| Tosello B, Garbi A, Blanc J, et al. The Impact of Chorionicity on Pregnancy Outcome and Neurodevelopment at 2 Years Old among Twins Born Preterm: The EPIPAGE-2 Cohort Study. <i>Obstet Gynecol Surv.</i> 2021;76(6):323-325.                                                          | Wrong population of interest (i.e., does not include infants born late preterm and/or at term)                                                  |
| Watson HA, Carlisle N, Seed PT, et al. Evaluating the use of the QUiPP app and its impact on the management of threatened preterm labour: A cluster randomised trial. <i>PLoS Med.</i> 2021;18(7):e1003689.                                                                            | Wrong population of interest (i.e., does not include infants born late preterm and/or at term)                                                  |
| Yang J, Epton MJ, Harris SL, et al. Reduced Exercise Capacity in Adults Born Very Low Birth Weight: A Population-Based Cohort Study. <i>Am J Respir Crit Care Med.</i> 2021;09.                                                                                                        | Wrong population of interest (i.e., does not include infants born late preterm and/or at term)                                                  |
| Cokyaman T, Kavuncuoglu S. Bronchopulmonary dysplasia frequency and risk factors in very low birth weight infants: A 3-year retrospective study. <i>Northern Clinics of Istanbul.</i> 2020;7(2):124-130.                                                                               | Wrong population of interest (i.e., does not include infants born late preterm and/or at term)                                                  |
| D'Apremont I, Marshall G, Musalem C, Mariani G, Musante G, Bancalari A, et al. Trends in Perinatal Practices and Neonatal Outcomes of Very Low Birth Weight Infants during a 16-year Period at NEOCOSUR Centers. <i>J Pediatr.</i> 2020;225:44-50.e1.                                  | Wrong population of interest (i.e., does not include all infants born late preterm and/or at term in an entire area or a representative sample) |
| Gentle SJ, Carlo WA, Tan S, et al. Association of Antenatal Corticosteroids and Magnesium Sulfate Therapy With Neurodevelopmental Outcome in Extremely Preterm Children. <i>Obstet Gynecol.</i> 2020;135(6):1377-1386.                                                                 | Wrong population of interest (i.e., does not include infants born late preterm and/or at term)                                                  |
| Hartel C, Spiegler J, Fortmann I, et al. Breastfeeding for 3 months or longer but not probiotics is associated with reduced risk for inattention/hyperactivity and conduct problems in very-low-birth-weight children at early primary school age. <i>Nutrients.</i> 2020;12(11):1-14. | Wrong population of interest (i.e., does not include all infants born late preterm and/or at term in an entire area or a representative sample) |
| Kawasaki H, Yamada T, Kosugi S. The mortality and morbidity of very low birth weight infants with trisomy 18 or trisomy 13 in Japan. <i>Prenat Diagn.</i> 2020;40(Supplement 1):119-20.                                                                                                | Wrong population of interest (i.e., does not include all infants born late preterm and/or at term)                                              |

|                                                                                                                                                                                                                                                                             |                                                                                                                                                 |
|-----------------------------------------------------------------------------------------------------------------------------------------------------------------------------------------------------------------------------------------------------------------------------|-------------------------------------------------------------------------------------------------------------------------------------------------|
|                                                                                                                                                                                                                                                                             | and/or at term in an entire area or a representative sample)                                                                                    |
| Kim JK, Hwang JH, Lee MH, Chang YS, Park WS. Mortality rate-dependent variations in antenatal corticosteroid-associated outcomes in very low birth weight infants with 23-34 weeks of gestation: A nationwide cohort study. <i>PLoS ONE</i> . 2020;15(10):e0240168.         | Wrong population of interest (i.e., does not include infants born late preterm and/or at term)                                                  |
| Kino E, Ohhashi M, Kawagoe Y, et al. Impact of tocolysis-intent magnesium sulfate and beta-adrenergic agonists on perinatal brain damage in infants born between 28-36 weeks' gestation. <i>J Obstet Gynaecol Res</i> . 2020;46(10):2027-2035.                              | Wrong population of interest (i.e., does not include all infants born late preterm and/or at term in an entire area or a representative sample) |
| Kong XY, Xu FD, Wang ZZ, Zhang S, Feng ZC. Antenatal corticosteroids administration on mortality and morbidity in premature twins born at 25 similar to 34 gestational weeks: A retrospective multicenter study. <i>Eur J Obstet Gynecol Reprod Biol</i> . 2020;253:259-65. | Wrong population of interest (i.e., does not include all infants born late preterm and/or at term in an entire area or a representative sample) |
| Liu SY, Yang HI, Chen CY, et al. The gestational effect of antenatal corticosteroids on respiratory distress syndrome in very low birth weight infants: A population-based study. <i>J Formos Med Assoc</i> . 2020;119(8):1267-1273.                                        | Wrong population of interest (i.e., does not include all infants born late preterm and/or at term in an entire area or a representative sample) |
| Ondusko DS, Garg B, Caughey AB, Pilliod RA, Carter EH. Is Appropriate Administration of Antenatal Corticosteroids Associated with Maternal Race? <i>Am J Perinatol</i> . 2020;29:29.                                                                                        | Wrong population of interest (i.e., does not include infants born late preterm and/or at term)                                                  |
| Poole KL, Saigal S, Van Lieshout RJ, Schmidt LA. Developmental programming of shyness: A longitudinal, prospective study across four decades. <i>Dev Psychopathol</i> . 2020;32(2):455-464.                                                                                 | Wrong population of interest (i.e., does not include infants born late preterm and/or at term)                                                  |
| Puia-Dumitrescu M, Greenberg RG, Younge N, et al. Disparities in the use of antenatal corticosteroids among women with hypertension in North Carolina. <i>J Perinatol</i> . 2020;40(3):456-462.                                                                             | Wrong population of interest (i.e., does not include infants born late preterm and/or at term)                                                  |
| Shafey A, Bashir RA, Shah P, et al. Outcomes and resource U.S. Age of infants born at $\leq 25$ weeks gestation in Canada. <i>Paediatrics &amp; Child Health (1205-7088)</i> . 2020;25(4):207-215.                                                                          | Wrong population of interest (i.e., does not include infants born late preterm and/or at term)                                                  |

|                                                                                                                                                                                                                                    |                                                                                                |
|------------------------------------------------------------------------------------------------------------------------------------------------------------------------------------------------------------------------------------|------------------------------------------------------------------------------------------------|
| Ushida T, Kotani T, Hayakawa M, et al. Antenatal corticosteroids and preterm offspring outcomes in hypertensive disorders of pregnancy: A Japanese cohort study. <i>Sci Rep.</i> 2020;10(1):9312.                                  | Wrong population of interest (i.e., does not include infants born late preterm and/or at term) |
| Ushida T, Kotani T, Sadachi R, et al. Antenatal Corticosteroids and Outcomes in Preterm Twins. <i>Obstet Gynecol.</i> 2020;135(6):1387-1397.                                                                                       | Wrong population of interest (i.e., does not include infants born late preterm and/or at term) |
| Yeo KT, Thomas R, Chow SS, et al. Improving incidence trends of severe intraventricular haemorrhages in preterm infants <32 weeks gestation: a cohort study. <i>Arch Dis Child Fetal Neonatal Ed.</i> 2020;105(2):145-150.         | Wrong population of interest (i.e., does not include infants born late preterm and/or at term) |
| Dzietko M, Schulz S, Preuss M, et al. Apolipoprotein E gene polymorphisms and intraventricular haemorrhage in infants born preterm: a large prospective multicentre cohort study. <i>Dev Med Child Neurol.</i> 2019;61(3):337-342. | Wrong population of interest (i.e., does not include infants born late preterm and/or at term) |
| Greene NH, Greenberg RG, O'Brien SM, et al. Variation in Gastrostomy Tube Placement in Premature Infants in the United States. <i>Am J Perinatol.</i> 2019;36(12):1243-1249.                                                       | Wrong population of interest (i.e., does not include infants born late preterm and/or at term) |
| Herrera TI, Vaz Ferreira MC, Toso A, et al. Neonatal outcomes of antenatal corticosteroids in preterm multiple pregnancies compared to singletons. <i>Early Hum Dev.</i> 2019;130:44-50.                                           | Wrong population of interest (i.e., does not include infants born late preterm and/or at term) |
| Kiechl-Kohlendorfer U, Simma B, Urlesberger B, et al. Low mortality and short-term morbidity in very preterm infants in Austria 2011-2016. <i>Acta Paediatr.</i> 2019;108(8):1419-1426.                                            | Wrong population of interest (i.e., does not include infants born late preterm and/or at term) |
| Kim JK, Chang YS, Sung S, Park WS. Mortality rate-dependent variations in the survival without major morbidities rate of extremely preterm infants. <i>Sci Rep.</i> 2019;9(1):7371.                                                | Wrong population of interest (i.e., does not include infants born late preterm and/or at term) |
| Koc E, Demirel N, Bas AY, et al. Early neonatal outcomes of very-low-birth-weight infants in Turkey: A prospective multicenter study of the Turkish Neonatal Society. <i>PLoS ONE.</i> 2019;14(12):e0226679.                       | Wrong population of interest (i.e., does not include infants born late preterm and/or at term) |
| Lee HS, Kim SY. Histological chorioamnionitis, antenatal steroids, and neonatal outcomes in very low birth weight infants: A nationwide study. <i>PLoS ONE.</i> 2019;14(10):e0224450.                                              | Wrong population of interest (i.e., does not include infants born late preterm and/or at term) |

|                                                                                                                                                                                                                                                                      |                                                                                                                                                 |
|----------------------------------------------------------------------------------------------------------------------------------------------------------------------------------------------------------------------------------------------------------------------|-------------------------------------------------------------------------------------------------------------------------------------------------|
| Lee J, Lee JH. A clinical scoring system to predict the need for extensive resuscitation at birth in very low birth weight infants. <i>BMC Pediatr.</i> 2019;19(1).                                                                                                  | Wrong population of interest (i.e., does not include all infants born late preterm and/or at term in an entire area or a representative sample) |
| Li Y, Meng DH, Wei QF, et al. Neurodevelopmental outcomes of extremely preterm infants in southern China: A multicenter study. <i>Early Hum Dev.</i> 2019;133:5-10.                                                                                                  | Wrong population of interest (i.e., does not include infants born late preterm and/or at term)                                                  |
| Moya FR, Mazela J, Shore PM, Simonson SG, Segal R, Simmons PD, et al. Prospective observational study of early respiratory management in preterm neonates less than 35 weeks of gestation. <i>BMC Pediatr.</i> 2019;19(1).                                           | Wrong population of interest (i.e., does not include all infants born late preterm and/or at term in an entire area or a representative sample) |
| Porta R, Capdevila E, Botet F, Verd S, Ginovart G, Moliner E, et al. Morbidity and mortality of very low birth weight multiples compared with singletons. <i>J Matern Fetal Neonatal Med.</i> 2019;32(3):389-97.                                                     | Wrong population of interest (i.e., does not include all infants born late preterm and/or at term in an entire area or a representative sample) |
| Savoy C, Mathewson KJ, Schmidt LA, et al. Exposure to antenatal corticosteroids and reduced respiratory sinus arrhythmia in adult survivors of extremely low birth weight. <i>Int J Neurosci.</i> 2019;129(8):776-783.                                               | Wrong population of interest (i.e., does not include infants born late preterm and/or at term)                                                  |
| Shigemi D, Yasunaga H. Antenatal corticosteroid administration in women undergoing tocolytic treatment who delivered before 34 weeks of gestation: a retrospective cohort study using a national inpatient database. <i>BMC Pregnancy Childbirth.</i> 2019;19(1):17. | Wrong population of interest (i.e., does not include infants born late preterm and/or at term)                                                  |
| Wang J, Yan J, Han J, Ning Y, Yan C. Risk factors for respiratory distress syndrome among Chinese infants of 34-42 weeks gestational age: A multi-center observational study. <i>Int J Clin Exp Med.</i> 2019;12(4):4354-4360.                                       | Wrong population of interest (i.e., does not include all infants born late preterm and/or at term in an entire area or a representative sample) |
| Xu F, Kong X, Duan S, et al. Care Practices, Morbidity and Mortality of Preterm Neonates in China, 2013-2014: a Retrospective study. <i>Sci Rep.</i> 2019;9(1):19863.                                                                                                | Wrong population of interest (i.e., does not include all infants born late preterm and/or at term in an entire area or a representative sample) |

|                                                                                                                                                                                                                                                                                                                |                                                                                                                                                 |
|----------------------------------------------------------------------------------------------------------------------------------------------------------------------------------------------------------------------------------------------------------------------------------------------------------------|-------------------------------------------------------------------------------------------------------------------------------------------------|
| Xu F, Kong X, Duan S, Lv H, Ju R, Li Z, et al. Respiratory distress syndrome in premature infants: A retrospective cohort study from 14 hospitals in China. <i>Int J Clin Exp Med</i> . 2019;12(6):7497-506.                                                                                                   | Wrong population of interest (i.e., does not include all infants born late preterm and/or at term in an entire area or a representative sample) |
| Kashanian M, Eshraghi N, Sheikhsari N, Bordbar A, Khatami E. Comparison between two doses of betamethasone administration with 12 hours vs. 24 hours intervals on prevention of respiratory distress syndrome: a randomised trial. <i>J Obstet Gynaecol</i> . 2018;38(6):770-776.                              | Wrong population of interest (i.e., does not include infants born late preterm and/or at term)                                                  |
| Kono Y, Yonemoto N, Nakanishi H, Kusuda S, Fujimura M. Changes in survival and neurodevelopmental outcomes of infants born at <25 weeks' gestation: a retrospective observational study in tertiary centres in Japan. <i>BMJ Paediatrics Open</i> . 2018;2(1):e000211.                                         | Wrong population of interest (i.e., does not include infants born late preterm and/or at term)                                                  |
| Palas D, Ehlinger V, Alberge C, et al. Efficacy of antenatal corticosteroids in preterm twins: the EPIPAGE-2 cohort study. <i>BJOG</i> . 2018;125(9):1164-1170.                                                                                                                                                | Wrong population of interest (i.e., does not include infants born late preterm and/or at term)                                                  |
| Riskin-Mashiah S, Reichman B, Bader D, et al. Population-based study on antenatal corticosteroid treatment in preterm small for gestational age and non-small for gestational age twin infants. <i>J Matern Fetal Neonatal Med</i> . 2018;31(5):553-559.                                                       | Wrong population of interest (i.e., does not include infants born late preterm and/or at term)                                                  |
| Sarokolai ZK, Niknafs P, Azizzadeh F, Bijari BB, Mousavi H. Bles versus curosurf for treatment of respiratory distress in preterm neonates and their adverse effects. <i>Iran J Pediatr</i> . 2018;28(4).                                                                                                      | Wrong population of interest (i.e., does not include all infants born late preterm and/or at term in an entire area or a representative sample) |
| Chevallier M, Debillon T, Pierrat V, et al. Leading causes of preterm delivery as risk factors for intraventricular hemorrhage in very preterm infants: results of the EPIPAGE 2 cohort study. <i>Am J Obstet Gynecol</i> . 2017;216(5):518.e1-518.e12.                                                        | Wrong population of interest (i.e., does not include infants born late preterm and/or at term)                                                  |
| Collaborative Study Group for Respiratory Distress Syndrome in Preterm I. [Effect of antenatal corticosteroids therapy on the mortality and morbidity of small for gestational age infants born at 24-34 completed weeks: a retrospective multicenter study]. <i>Zhonghua Erke Zazhi</i> . 2017;55(8):613-618. | Wrong population of interest (i.e., does not include infants born late preterm and/or at term)                                                  |
| Fuller KP, DeGroff S, Borgida AF. Neonatal outcomes based on antenatal corticosteroid exposure time for infants delivered between 23 and 34 weeks gestation. <i>Clin Exp Obstet Gynecol</i> . 2017;44(2):247-251.                                                                                              | Wrong population of interest (i.e., does not include infants born late preterm and/or at term)                                                  |

|                                                                                                                                                                                                                                                              |                                                                                                                                                 |
|--------------------------------------------------------------------------------------------------------------------------------------------------------------------------------------------------------------------------------------------------------------|-------------------------------------------------------------------------------------------------------------------------------------------------|
| Gagliardi L, Amador C, Puglia M, et al. Area-based study identifies risk factors associated with missed antenatal corticosteroid prophylaxis in women delivering preterm infants. <i>Acta Paediatr.</i> 2017;106(2):250-255.                                 | Wrong population of interest (i.e., does not include infants born late preterm and/or at term)                                                  |
| Inoue H, Ochiai M, Yasuoka K, Tanaka K, Kurata H, Fujiyoshi J, et al. Early Mortality and Morbidity in Infants with Birth Weight of 500 Grams or Less in Japan. <i>J Pediatr.</i> 2017;190:112-7.e3.                                                         | Wrong population of interest (i.e., does not include all infants born late preterm and/or at term in an entire area or a representative sample) |
| McKinlay CJD, Cutfield WS, Battin MR, et al. Mid-Childhood Bone Mass After Exposure to Repeat Doses of Antenatal Glucocorticoids: A Randomized Trial. <i>Pediatrics.</i> 2017;139(5).                                                                        | Wrong population of interest (i.e., does not include infants born late preterm and/or at term)                                                  |
| Norberg H, Kowalski J, Marsal K, Norman M. Timing of antenatal corticosteroid administration and survival in extremely preterm infants: a national population-based cohort study. <i>BJOG.</i> 2017;124(10):1567-1574.                                       | Wrong population of interest (i.e., does not include infants born late preterm and/or at term)                                                  |
| Norman M, Piedvache A, Borch K, et al. Association of Short Antenatal Corticosteroid Administration-to-Birth Intervals With Survival and Morbidity Among Very Preterm Infants: Results From the EPICE Cohort. <i>JAMA Pediatr.</i> 2017;171(7):678-686.      | Wrong population of interest (i.e., does not include infants born late preterm and/or at term)                                                  |
| Pai VV, Carmichael SL, Kan P, Lee HC. Maternal body mass index and risk of intraventricular hemorrhage in preterm neonates. <i>Pediatrics Conference: National Conference on Education.</i> 2017;142(1)                                                      | Wrong population of interest (i.e., does not include infants born late preterm and/or at term)                                                  |
| Park JH, Chang YS, Sung S, Ahn SY, Park WS. Trends in Overall Mortality, and Timing and Cause of Death among Extremely Preterm Infants near the Limit of Viability. <i>PLoS ONE.</i> 2017;12(1):e0170220.                                                    | Wrong population of interest (i.e., does not include infants born late preterm and/or at term)                                                  |
| Sheibani L, Fong A, Henry DE, Norton ME, Truong YN, Anyikam A, et al. Maternal and neonatal outcomes after antenatal corticosteroid administration for PPROM at 32 to 33 6/7 weeks gestational age. <i>J Matern Fetal Neonatal Med.</i> 2017;30(14):1676-80. | Wrong population of interest (i.e., does not include all infants born late preterm and/or at term in an entire area or a representative sample) |
| Souter V, Kauffman E, Marshall AJ, Katon JG. Assessing the potential impact of extending antenatal steroids to the late preterm period. <i>Am J Obstet Gynecol.</i> 2017;217(4):461.e1-461.e7.                                                               | Wrong population of interest (i.e., does not include all infants born late preterm and/or at term in an entire area or a representative sample) |

|                                                                                                                                                                                                                                                                   |                                                                                                                                                 |
|-------------------------------------------------------------------------------------------------------------------------------------------------------------------------------------------------------------------------------------------------------------------|-------------------------------------------------------------------------------------------------------------------------------------------------|
| Travers CP, Clark RH, Spitzer AR, Das A, Garite TJ, Carlo WA. Exposure to any antenatal corticosteroids and outcomes in preterm infants by gestational age: prospective cohort study. <i>BMJ</i> . 2017;356:j1039.                                                | Wrong population of interest (i.e., does not include all infants born late preterm and/or at term in an entire area or a representative sample) |
| Boghossian NS, McDonald SA, Bell EF, et al. Association of Antenatal Corticosteroids With Mortality, Morbidity, and Neurodevelopmental Outcomes in Extremely Preterm Multiple Gestation Infants. <i>JAMA Pediatr</i> . 2016;170(6):593-601.                       | Wrong population of interest (i.e., does not include children born late preterm and/or at term)                                                 |
| Grandi C, Gonzalez A, Zubizarreta J, Red Neonatal N. Perinatal factors associated with neonatal mortality in very low birth weight infants: a multicenter study. <i>Arch Argent Pediatr</i> . 2016;114(5):426-33.                                                 | Wrong population of interest (i.e., does not include all infants born late preterm and/or at term in an entire area or a representative sample) |
| Morrison KM, Ramsingh L, Gunn E, et al. Cardiometabolic Health in Adults Born Premature With Extremely Low Birth Weight. <i>Pediatrics</i> . 2016;138(4):10.                                                                                                      | Wrong population of interest (i.e., does not include infants born late preterm and/or at term)                                                  |
| Savoy C, Ferro MA, Schmidt LA, Saigal S, Van Lieshout RJ. Prenatal betamethasone exposure and psychopathology risk in extremely low birth weight survivors in the third and fourth decades of life. <i>Psychoneuroendocrinology</i> . 2016;74:278-285.            | Wrong population of interest (i.e., does not include infants born late preterm and/or at term)                                                  |
| Su YY, Wang SH, Chou HC, Chen CY, Hsieh WS, Tsao PN, et al. Morbidity and mortality of very low birth weight infants in Taiwan-Changes in 15 years: A population based study. <i>J Formos Med Assoc</i> . 2016;115(12):1039-45.                                   | Wrong population of interest (i.e., does not include all infants born late preterm and/or at term in an entire area or a representative sample) |
| Wang ME, Patel AB, Hansen NI, Arlington L, Prakash A, Hibberd PL. Risk factors for possible serious bacterial infection in a rural cohort of young infants in central India. <i>BMC Public Health</i> . 2016;16(1):1097.                                          | Wrong population of interest (i.e., does not include all infants born late preterm and/or at term in an entire area or a representative sample) |
| Ancel PY, Goffinet F, Group E-W, et al. Survival and morbidity of preterm children born at 22 through 34 weeks' gestation in France in 2011: results of the EPIPAGE-2 cohort study. <i>JAMA Pediatr</i> . 2015;169(3):230-8.                                      | Wrong population of interest (i.e., does not include infants born late preterm and/or at term)                                                  |
| Boesveld M, Oudijk MA, Koenen SV, et al. Evaluation of strategies regarding management of imminent preterm delivery before 32 weeks of gestation: a regional cohort study among 1375 women in the Netherlands. <i>Am J Obstet Gynecol</i> . 2015;212(3):348.e1-7. | Wrong population of interest (i.e., does not include infants born late preterm and/or at term)                                                  |



|                                                                                                                                                                                                                                                                                                       |                                                                                                                                                 |
|-------------------------------------------------------------------------------------------------------------------------------------------------------------------------------------------------------------------------------------------------------------------------------------------------------|-------------------------------------------------------------------------------------------------------------------------------------------------|
| Germany L, Saurel-Cubizolles MJ, Ehlinger V, et al. Social context of preterm delivery in France in 2011 and impact on short-term health outcomes: the EPIPAGE 2 cohort study. <i>Paediatr Perinat Epidemiol.</i> 2015;29(3):184-95.                                                                  | Wrong population of interest (i.e., does not include infants born late preterm and/or at term)                                                  |
| Melamed N, Shah J, Soraisham A, et al. Association Between Antenatal Corticosteroid Administration-to-Birth Interval and Outcomes of Preterm Neonates. <i>Obstet Gynecol.</i> 2015;125(6):1377-1384.                                                                                                  | Wrong population of interest (i.e., does not include infants born late preterm and/or at term)                                                  |
| Network of Northwest Neonatal Professional Collaboration G. [Epidemiological survey of neonatal respiratory distress syndrome in part of northwest regions in China]. <i>Zhonghua Er Ke Za Zhi.</i> 2015;53(5):341-7.                                                                                 | Wrong population of interest (i.e., does not include all infants born late preterm and/or at term in an entire area or a representative sample) |
| Profit J, Goldstein BA, Tamareis J, Kan P, Lee HC. Regional variation in antenatal corticosteroid use: A network-level quality improvement study. <i>Pediatrics.</i> 2015;135(2):e397-e404.                                                                                                           | Wrong population of interest (i.e., does not include infants born late preterm and/or at term)                                                  |
| van der Voorn B, Wit JM, van der Pal SM, Rotteveel J, Finken MJ. Antenatal glucocorticoid treatment and polymorphisms of the glucocorticoid and mineralocorticoid receptors are associated with IQ and behavior in young adults born very preterm. <i>J Clin Endocrinol Metab.</i> 2015;100(2):500-7. | Wrong population of interest (i.e., does not include infants born late preterm and/or at term)                                                  |
| Murthy K, Yanowitz TD, DiGeronimo R, Dykes FD, Zaniletti I, Sharma J, et al. Short-term outcomes for preterm infants with surgical necrotizing enterocolitis. <i>J Perinatol.</i> 2014;34(10):736-40.                                                                                                 | Wrong population of interest (i.e., does not include all infants born late preterm and/or at term in an entire area or a representative sample) |
| Shankaran S, Lin A, Maller-Kesselman J, Zhang H, O'Shea TM, Bada HS, et al. Maternal race, demography, and health care disparities impact risk for intraventricular hemorrhage in preterm neonates. <i>J Pediatr.</i> 2014;164(5):1005-11.e3.                                                         | Wrong population of interest (i.e., does not include all infants born late preterm and/or at term in an entire area or a representative sample) |
| Aleman A, Cafferata ML, Gibbons L, et al. Use of antenatal corticosteroids for preterm birth in Latin America: providers knowledge, attitudes and practices. <i>Reproductive Health.</i> 2013;10:4.                                                                                                   | Wrong population of interest (i.e., does not include infants born late preterm and/or at term)                                                  |
| Khalife N, Glover V, Taanila A, Ebeling H, Jarvelin MR, Rodriguez A. Prenatal glucocorticoid treatment and later mental health in children and adolescents. <i>PLoS ONE.</i> 2013;8(11):e81394.                                                                                                       | Wrong population of interest (i.e., does not include infants born late preterm and/or at term)                                                  |

|                                                                                                                                                                                                                                                                                                                                                   |                                                                                                                                                 |
|---------------------------------------------------------------------------------------------------------------------------------------------------------------------------------------------------------------------------------------------------------------------------------------------------------------------------------------------------|-------------------------------------------------------------------------------------------------------------------------------------------------|
| Konduri GG, Bakhutashvili I, Eis A, Afolayan A. Antenatal betamethasone improves postnatal transition in late preterm lambs with persistent pulmonary hypertension of the newborn. <i>Pediatr Res.</i> 2013;73(5):621-629.                                                                                                                        | Wrong population of interest (i.e., does not include infants born late preterm and/or at term)                                                  |
| Kuk JY, An JJ, Cha HH, et al. Optimal time interval between a single course of antenatal corticosteroids and delivery for reduction of respiratory distress syndrome in preterm twins. <i>Am J Obstet Gynecol.</i> 2013;209(3):256.e1-7.                                                                                                          | Wrong population of interest (i.e., does not include infants born late preterm and/or at term)                                                  |
| Kusuda S, Fujimura M, Uchiyama A, Nakanishi H, Totsu S. Identification of practices and morbidities affecting the mortality of very low birth weight infants using a multilevel logistic analysis: Clinical trial or standardisation? <i>BMJ Open.</i> 2013;3(8).                                                                                 | Wrong population of interest (i.e., does not include all infants born late preterm and/or at term in an entire area or a representative sample) |
| Lutz T, Buckmaster A, Bowen J, Kluckow M, Wright I. Need for intensive care for neonates born between 29 and 34 weeks inclusive gestation. <i>J Paediatr Child Health.</i> 2013;49(2):125-30.                                                                                                                                                     | Wrong population of interest (i.e., does not include infants born late preterm and/or at term)                                                  |
| Schreiner F, Poralla C, Haertel C, Heckmann M, Woelfle J, Bartmann P, et al. Glucocorticoid receptor gene polymorphisms and neonatal outcome of vlbw preterm infants: Preliminary results from a German multicenter study. <i>Endocrine Reviews Conference: 95th Annual Meeting and Expo of the Endocrine Society, ENDO.</i> 2013;34(3 SUPPL. 1). | Wrong population of interest (i.e., does not include all infants born late preterm and/or at term in an entire area or a representative sample) |
| Soll RF, Edwards EM, Badger GJ, Kenny MJ, Morrow KA, Buzas JS, et al. Obstetric and neonatal care practices for infants 501 to 1500 g from 2000 to 2009. <i>Pediatrics.</i> 2013;132(2):222-8.                                                                                                                                                    | Wrong population of interest (i.e., does not include all infants born late preterm and/or at term in an entire area or a representative sample) |
| Wadhawan R, Oh W, Vohr BR, Saha S, Das A, Bell EF, et al. Spontaneous intestinal perforation in extremely low birth weight infants: association with indometacin therapy and effects on neurodevelopmental outcomes at 18-22 months corrected age. <i>Arch Dis Child Fetal Neonatal Ed.</i> 2013;98(2):F127-32.                                   | Wrong population of interest (i.e., does not include all infants born late preterm and/or at term in an entire area or a representative sample) |
| Dukhovny D, Dukhovny S, Pursley DM, Escobar GJ, McCormick MC, Mao WY, et al. The impact of maternal characteristics on the moderately premature infant: an antenatal maternal transport clinical prediction rule...[corrected] [published erratum appears in J PERINATOL 2013; 33:413]. <i>J Perinatol.</i> 2012;32(7):532-8.                     | Wrong population of interest (i.e., does not include all infants born late preterm and/or at term in an entire area or a representative sample) |

|                                                                                                                                                                                                                                                   |                                                                                                                                                 |
|---------------------------------------------------------------------------------------------------------------------------------------------------------------------------------------------------------------------------------------------------|-------------------------------------------------------------------------------------------------------------------------------------------------|
| Eriksson L, Haglund B, Ewald U, Od lind V, Kieler H. Health consequences of prophylactic exposure to antenatal corticosteroids among children born late preterm or term. <i>Acta Obstet Gynecol Scand.</i> 2012;91(12):1415-21.                   | Wrong population of interest (i.e., does not include infants born late preterm and/or at term)                                                  |
| Gyamfi-Bannerman C, Gilbert S, Landon MB, et al. Effect of antenatal corticosteroids on respiratory morbidity in singletons after late-preterm birth. <i>Obstet Gynecol.</i> 2012;119(3):555-9.                                                   | Wrong population of interest (i.e., does not include all infants born late preterm and/or at term in an entire area or a representative sample) |
| Rich W, Finer NN, Gantz MG, Newman NS, Hensman AM, Hale EC, et al. Enrollment of extremely low birth weight infants in a clinical research study may not be representative. <i>Pediatrics.</i> 2012;129(3):480-4.                                 | Wrong population of interest (i.e., does not include all infants born late preterm and/or at term in an entire area or a representative sample) |
| Tavosnanska J, Carreras IM, Farina D, Luchtenberg G, Celadilla ML, Celotto M, et al. Mortality and morbidity of very low birth weight newborn infants assisted in Buenos Aires public hospitals. <i>Arch Argent Pediatr.</i> 2012;110(5):394-403. | Wrong population of interest (i.e., does not include all infants born late preterm and/or at term in an entire area or a representative sample) |
| Altman M, Vanpee M, Cnattingius S, Norman M. Neonatal morbidity in moderately preterm infants: a Swedish national population-based study. <i>J Pediatr.</i> 2011;158(2):239-44.e1.                                                                | Wrong population of interest (i.e., does not include all infants born late preterm and/or at term in an entire area or a representative sample) |
| Fehlmann E, Tapia JL, Fernandez R, Bancalari A, Fabres J, D'Apremont I, et al. [Impact of respiratory distress syndrome in very low birth weight infants: a multicenter South-American study]. <i>Arch Argent Pediatr.</i> 2010;108(5):393-400.   | Wrong population of interest (i.e., does not include all infants born late preterm and/or at term in an entire area or a representative sample) |
| Eriksson L, Haglund B, Ewald U, Od lind V, Kieler H. Short and long-term effects of antenatal corticosteroids assessed in a cohort of 7,827 children born preterm. <i>Acta Obstet Gynecol Scand.</i> 2009;88(8):933-8.                            | Wrong population of interest (i.e., does not include infants born late preterm and/or at term)                                                  |
| Joseph KS, Nette F, Scott H, Vincer MJ. Prenatal Corticosteroid Prophylaxis for Women Delivering at Late Preterm Gestation. <i>Pediatrics.</i> 2009;124(5):E835-E843.                                                                             | Wrong population of interest (i.e., does not include all infants born late preterm and/or at term in an entire area or a representative sample) |

|                                                                                                                                                                                                                                                                                            |                                                                                                                                                        |
|--------------------------------------------------------------------------------------------------------------------------------------------------------------------------------------------------------------------------------------------------------------------------------------------|--------------------------------------------------------------------------------------------------------------------------------------------------------|
| <p>Klinger G, Levy I, Sirota L, Boyko V, Reichman B, Lerner-Geva L, et al. Epidemiology and risk factors for early onset sepsis among very-low-birthweight infants. <i>Am J Obstet Gynecol.</i> 2009;201(1):38.e1-6.</p>                                                                   | <p>Wrong population of interest (i.e., does not include all infants born late preterm and/or at term in an entire area or a representative sample)</p> |
| <p>Luu TM, Ment LR, Schneider KC, Katz KH, Allan WC, Vohr BR. Lasting effects of preterm birth and neonatal brain hemorrhage at 12 years of age. <i>Pediatrics.</i> 2009;123(3):1037-44.</p>                                                                                               | <p>Wrong population of interest (i.e., does not include infants born late preterm and/or at term)</p>                                                  |
| <p>Lee BH, Stoll BJ, McDonald SA, Higgins RD, National Institute of Child H, Human Development Neonatal Research N. Neurodevelopmental outcomes of extremely low birth weight infants exposed prenatally to dexamethasone versus betamethasone. <i>Pediatrics.</i> 2008;121(2):289-96.</p> | <p>Wrong population of interest (i.e., does not include infants born late preterm and/or at term)</p>                                                  |
| <p>Maksic H, Hadzagic-Catibusic F, Heljic S, Dizdarevic J. The effects of antenatal corticosteroid treatment on IVH-PVh of premature infants. <i>Bosn J Basic Med Sci.</i> 2008;8(1):58-62.</p>                                                                                            | <p>Wrong population of interest (i.e., does not include infants born late preterm and/or at term)</p>                                                  |
| <p>Pattanittum P, Ewens MR, Laopaiboon M, Lumbiganon P, McDonald SJ, Crowther CA, et al. Use of antenatal corticosteroids prior to preterm birth in four South East Asian countries within the SEA-ORCHID project. <i>BMC Pregnancy Childbirth.</i> 2008;8:47.</p>                         | <p>Wrong population of interest (i.e., does not include infants born late preterm and/or at term)</p>                                                  |
| <p>Abdel-Latif ME, Bajuk B, Lui K, Oei J, Group NSWoANICUS. Short-term outcomes of infants of substance-using mothers admitted to neonatal intensive care units in New South Wales and the Australian Capital Territory. <i>J Paediatr Child Health.</i> 2007;43(3):127-33.</p>            | <p>Wrong population of interest (i.e., does not include all infants born late preterm and/or at term in an entire area or a representative sample)</p> |
| <p>Dalziel SR, Lim VK, Lambert A, et al. Psychological functioning and health-related quality of life in adulthood after preterm birth. <i>Dev Med Child Neurol.</i> 2007;49(8):597-602.</p>                                                                                               | <p>Wrong population of interest (i.e., does not include infants born late preterm and/or at term)</p>                                                  |
| <p>Dalziel SR, Parag V, Rodgers A, Harding JE. Cardiovascular risk factors at age 30 following preterm birth. <i>Int J Epidemiol.</i> 2007;36(4):907-15.</p>                                                                                                                               | <p>Wrong population of interest (i.e., does not include infants born late preterm and/or at term)</p>                                                  |
| <p>Reime B, Tu AW, Lee SK, Canadian Neonatal N. Treatment differences between Aboriginal and white infants admitted to Canadian neonatal intensive care units. <i>Paediatr Perinat Epidemiol.</i> 2007;21(6):532-40.</p>                                                                   | <p>Wrong population of interest (i.e., does not include infants born late preterm and/or at term)</p>                                                  |

|                                                                                                                                                                                                                                                                                                      |                                                                                                                                                 |
|------------------------------------------------------------------------------------------------------------------------------------------------------------------------------------------------------------------------------------------------------------------------------------------------------|-------------------------------------------------------------------------------------------------------------------------------------------------|
| Chen MJ, Shu CH, Kao HA, Hung HY, Chang JH, Jim WT, et al. The effect of planned maternal transport on postnatal outcomes in very low birth weight infants. <i>Clinical Neonatology</i> . 2006;13(1):6-11.                                                                                           | Wrong population of interest (i.e., does not include all infants born late preterm and/or at term in an entire area or a representative sample) |
| Dalziel SR, Fenwick S, Cundy T, et al. Peak bone mass after exposure to antenatal betamethasone and prematurity: follow-up of a randomized controlled trial. <i>J Bone Miner Res</i> . 2006;21(8):1175-86.                                                                                           | Wrong population of interest (i.e., does not include infants born late preterm and/or at term)                                                  |
| Dalziel SR, Rea HH, Walker NK, et al. Long term effects of antenatal betamethasone on lung function: 30 year follow up of a randomised controlled trial. <i>Thorax</i> . 2006;61(8):678-83.                                                                                                          | Wrong population of interest (i.e., does not include infants born late preterm and/or at term)                                                  |
| Kusuda S, Fujimura M, Sakuma I, Aotani H, Kabe K, Itani Y, et al. Morbidity and mortality of infants with very low birth weight in Japan: center variation. <i>Pediatrics</i> . 2006;118(4):e1130-8.                                                                                                 | Wrong population of interest (i.e., does not include all infants born late preterm and/or at term in an entire area or a representative sample) |
| Dalziel SR, Lim VK, Lambert A, et al. Antenatal exposure to betamethasone: psychological functioning and health related quality of life 31 years after inclusion in randomised controlled trial. <i>BMJ</i> . 2005;331(7518):665.                                                                    | Wrong population of interest (i.e., does not include infants born late preterm and/or at term)                                                  |
| Dalziel SR, Walker NK, Parag V, et al. Cardiovascular risk factors after antenatal exposure to betamethasone: 30-year follow-up of a randomised controlled trial. <i>Lancet</i> . 2005;365(9474):1856-62.                                                                                            | Wrong population of interest (i.e., does not include infants born late preterm and/or at term)                                                  |
| Hayter MA, Anderson L, Claydon J, et al. Variations in early and intermediate neonatal outcomes for inborn infants admitted to a Canadian NICU and born of hypertensive pregnancies. <i>JOGC</i> . 2005;27(1):25-32.                                                                                 | Wrong population of interest (i.e., does not include infants born late preterm and/or at term)                                                  |
| Kumar P, Seshadri R. Neonatal morbidity and growth in very low birth-weight infants after multiple courses of antenatal steroids. <i>J Perinatol</i> . 2005;25(11):698-702.                                                                                                                          | Wrong population of interest (i.e., does not include infants born late preterm and/or at term)                                                  |
| Pasquier JC, Rabilloud M, Picaud JC, Ecochard R, Claris O, Gaucherand P, et al. A prospective population-based study of 598 cases of PPRM between 24 and 34 weeks' gestation: description, management, and mortality (DOMINOS cohort). <i>Eur J Obstet Gynecol Reprod Biol</i> . 2005;121(2):164-70. | Wrong population of interest (i.e., does not include all infants born late preterm and/or at term in an entire area or a representative sample) |

|                                                                                                                                                                                                                                                                                           |                                                                                                                                                 |
|-------------------------------------------------------------------------------------------------------------------------------------------------------------------------------------------------------------------------------------------------------------------------------------------|-------------------------------------------------------------------------------------------------------------------------------------------------|
| von Dadelszen P, Magee LA, Taylor EL, et al. Maternal hypertension and neonatal outcome among small for gestational age infants. <i>Obstet Gynecol.</i> 2005;106(2):335-9.                                                                                                                | Wrong population of interest (i.e., does not include infants born late preterm and/or at term)                                                  |
| Asnafeji N, Pourreza R, Miri S. Pregnancy outcome in premature delivery of between 34-37 weeks and the effects of corticosteroid on it. 2004.                                                                                                                                             | Wrong population of interest (i.e., does not include infants born late preterm and/or at term)                                                  |
| Dalziel SR, Liang A, Parag V, Rodgers A, Harding JE. Blood pressure at 6 years of age after prenatal exposure to betamethasone: follow-up results of a randomized, controlled trial. <i>Pediatrics.</i> 2004;114(3):e373-7.                                                               | Wrong population of interest (i.e., does not include infants born late preterm and/or at term)                                                  |
| French NP, Hagan R, Evans SF, Mullan A, Newnham JP. Repeated antenatal corticosteroids: Effects on cerebral palsy and childhood behavior. <i>Am J Obstet Gynecol.</i> 2004;190(3):588-595.                                                                                                | Wrong population of interest (i.e., does not include infants born late preterm and/or at term)                                                  |
| Wijnberger LD, Bilardo CM, Hecher K, Stigter RH, Visser GH. Effect of antenatal glucocorticoid therapy on arterial and venous blood flow velocity waveforms in severely growth-restricted fetuses. <i>Ultrasound Obstet Gynecol.</i> 2004;23(6):584-9.                                    | Wrong population of interest (i.e., does not include all infants born late preterm and/or at term in an entire area or a representative sample) |
| Subtil D, Tiberghien P, Devos P, et al. Immediate and delayed effects of antenatal corticosteroids on fetal heart rate: a randomized trial that compares betamethasone acetate and phosphate, betamethasone phosphate, and dexamethasone. <i>Am J Obstet Gynecol.</i> 2003;188(2):524-31. | Wrong population of interest (i.e., does not include infants born late preterm and/or at term)                                                  |
| Thorp JA, O'Connor M, Belden B, Etzenhouser J, Hoffman EL, Jones PG. Effects of phenobarbital and multiple-dose corticosteroids on developmental outcome at age 7 years. <i>Obstet Gynecol.</i> 2003;101(2):363-73.                                                                       | Wrong population of interest (i.e., does not include infants born late preterm and/or at term)                                                  |
| McEvoy C, Bowling S, Williamson K, et al. The effect of a single remote course versus weekly courses of antenatal corticosteroids on functional residual capacity in preterm infants: a randomized trial. <i>Pediatrics.</i> 2002;110(2 Pt 1):280-4.                                      | Wrong population of interest (i.e., does not include infants born late preterm and/or at term)                                                  |
| Thorp JA, Jones PG, Knox E, Clark RH. Does antenatal corticosteroid therapy affect birth weight and head circumference? <i>Obstet Gynecol.</i> 2002;99(1):101-8.                                                                                                                          | Wrong population of interest (i.e., does not include all infants born late preterm and/or at term in an entire area or a representative sample) |

|                                                                                                                                                                                                                                                                                       |                                                                                                                                                 |
|---------------------------------------------------------------------------------------------------------------------------------------------------------------------------------------------------------------------------------------------------------------------------------------|-------------------------------------------------------------------------------------------------------------------------------------------------|
| Thorp JA, Jones PG, Peabody JL, Knox E, Clark RH. Effect of antenatal and postnatal corticosteroid therapy on weight gain and head circumference growth in the nursery. <i>Obstet Gynecol.</i> 2002;99(1):109-15.                                                                     | Wrong population of interest (i.e., does not include all infants born late preterm and/or at term in an entire area or a representative sample) |
| Thorp JA, Jones AM, Hunt C, Clark R. The effect of multidose antenatal betamethasone on maternal and infant outcomes. <i>Am J Obstet Gynecol.</i> 2001;184(2):196-202.                                                                                                                | Wrong population of interest (i.e., does not include infants born late preterm and/or at term)                                                  |
| Kelly MK, Schneider EP, Petrikovsky BM, Lesser ML. Effect of antenatal steroid administration on the fetal biophysical profile. <i>J Clin Ultrasound.</i> 2000;28(5):224-6.                                                                                                           | Wrong population of interest (i.e., does not include infants born late preterm and/or at term)                                                  |
| McKenna DS, Wittber GM, Nagaraja HN, Samuels P. The effects of repeat doses of antenatal corticosteroids on maternal adrenal function. <i>Am J Obstet Gynecol.</i> 2000;183(3):669-73.                                                                                                | Wrong population of interest (i.e., does not include infants born late preterm and/or at term)                                                  |
| Vermillion ST, Soper DE, Newman RB. Neonatal sepsis and death after multiple courses of antenatal betamethasone therapy. <i>Am J Obstet Gynecol.</i> 2000;183(4):810-4.                                                                                                               | Wrong population of interest (i.e., does not include infants born late preterm and/or at term)                                                  |
| Battarbee AN, Ye Y, Szychowski JM, Casey BM, Tita AT, Boggess KA. Euglycemia after antenatal late preterm steroids: a multicenter, randomized controlled trial. <i>Am J Obstet Gynecol MFM.</i> 2022;4(4):100625.                                                                     | Wrong intervention group of interest (i.e., administration of ACS was at $\geq 34+0$ weeks of gestational age)                                  |
| Battarbee AN, Ye Y, Szychowski JM, Tita AT, Boggess K. Euglycemia after antenatal late preterm steroids (E-ALPS): a multicenter, randomized controlled trial. <i>Am J Obstet Gynecol.</i> 2022;226(1 Supplement):S42-S43.                                                             | Wrong intervention group of interest (i.e., administration of ACS was at $\geq 34+0$ weeks of gestational age)                                  |
| Bitenc M, Ovsenik L, Lucovnik M, Verdenik I, Kornhauser Cerar L. Association between latency period and perinatal outcomes after preterm premature rupture of membranes at 32-37 weeks of gestation: a perinatal registry-based cohort study. <i>J Perinat Med.</i> 2022;50(1):18-24. | Wrong intervention group of interest (i.e., no details on ACS exposure for population of interest)                                              |
| Bulut AN, Cundubey CR, Ceyhan V, Aydin E. Comparison of neonatal outcomes with and without the administration of betamethasone in late preterm births. <i>Int J Gynaecol Obstet.</i> 2022;156(2):349-354.                                                                             | Wrong intervention group of interest (i.e., administration of ACS was at $\geq 34+0$ weeks of gestational age)                                  |
| Collaborators WAT. Antenatal dexamethasone for late preterm birth: A multi-centre, two-arm, parallel, double-blind, placebo-controlled, randomized trial. <i>EClinicalMedicine.</i> 2022;44:101285.                                                                                   | Wrong intervention group of interest (i.e., administration of ACS was at $\geq 34+0$ weeks of gestational age)                                  |

|                                                                                                                                                                                                                                                                                                                                              |                                                                                                                  |
|----------------------------------------------------------------------------------------------------------------------------------------------------------------------------------------------------------------------------------------------------------------------------------------------------------------------------------------------|------------------------------------------------------------------------------------------------------------------|
| da Cunha A, Rezende KBD, Moreira MEL, da Gama SGN, Leal MD. Use of antenatal corticosteroids in Brazil: data analysis from the National Survey Nascer no Brasil. <i>Rev Paul Pediatr.</i> 2022;40:7.                                                                                                                                         | Wrong intervention group of interest (i.e., administration of ACS was at $\geq 34+0$ weeks of gestational age)   |
| Damkjaer M, Loane M, Urhøj SK, Ballardini E, Caverro-Carbonell C, Coi A, et al. Preterm birth and prescriptions for cardiovascular, antiseizure, antibiotics and antiasthmatic medication in children up to 10 years of age: a population-based data linkage cohort study across six European regions. <i>BMJ open.</i> 2022;12(10):e061746. | Wrong intervention group of interest (i.e., no ACS exposure)                                                     |
| Hutcheon JA, Liauw J. Improving the external validity of Antenatal Late Preterm Steroids trial findings. <i>Paediatr Perinat Epidemiol.</i> 2022;04:04.                                                                                                                                                                                      | Wrong intervention group of interest (i.e., administration of ACS was at $\geq 34+0$ weeks of gestational age)   |
| Hutcheon JA, Strumpf EC, Liauw J, et al. Antenatal corticosteroid administration and attention-deficit/hyperactivity disorder in childhood: a regression discontinuity study. <i>CMAJ.</i> 2022;194(7):E235-E241.                                                                                                                            | Wrong intervention group of interest (i.e., no ACS exposure)                                                     |
| Kearsey EOR, Been JV, Souter VL, Stock SJ. The impact of the Antenatal Late Preterm Steroids trial on the administration of antenatal corticosteroids. <i>Am J Obstet Gynecol.</i> 2022;227(2):280.e1-280.e15.                                                                                                                               | Wrong intervention group of interest (i.e., administration of ACS was at $\geq 34+0$ weeks of gestational age)   |
| Laptook AR, Chalak L, Pappas A, et al. The effects of betamethasone on the amplitude integrated EEG of infants born at 34- or 35-weeks gestation. <i>J Perinatol.</i> 2022;42(12):1615-1621.                                                                                                                                                 | Wrong intervention group of interest (i.e., administration of ACS was at $\geq 34+0$ weeks of gestational age)   |
| Laugesen K, Sorensen HT, Jorgensen JOL, Petersen I. Prenatal exposure to glucocorticoids and the prevalence of overweight or obesity in childhood. <i>Eur J Endocrinol.</i> 2022;186(4):429-440.                                                                                                                                             | Wrong intervention group of interest (i.e., no ACS exposure)                                                     |
| Lin Y-H, Lin C-H, Lin M-C, Hsu Y-C, Hsu C-T. Antenatal corticosteroid exposure is associated with childhood mental disorders in late preterm and term infants. <i>J Pediatr.</i> 2022.                                                                                                                                                       | Wrong intervention group of interest (i.e., administration of ACS included $\geq 34+0$ weeks of gestational age) |
| Tahir S, Iqbal F, Jabeen S, Nawaz A, Arshad Z, Rasul S. Comparison of neonatal respiratory morbidity in neonates delivered at term by elective caesarean section with and without antenatal Corticosteroid. <i>Journal of Rawalpindi Medical College.</i> 2022;26(3).                                                                        | Wrong intervention group of interest (i.e., administration of ACS was at $\geq 34+0$ weeks of gestational age)   |
| Gagnon LC, Allen VM, Crane JM, Jangaard K, Brock JA, Woolcott CG. The association between threatened preterm labour and perinatal outcomes at term: a population-based cohort study. <i>BJOG.</i> 2021;128(7):1145-1150.                                                                                                                     | Wrong intervention group of interest (i.e., no details on ACS exposure)                                          |



|                                                                                                                                                                                                                                                               |                                                                                                                |
|---------------------------------------------------------------------------------------------------------------------------------------------------------------------------------------------------------------------------------------------------------------|----------------------------------------------------------------------------------------------------------------|
| Gulersen M, Gyamfi-Bannerman C, Greenman M, Lenchner E, Rochelson B, Bornstein E. Time interval from late preterm antenatal corticosteroid administration to delivery and the impact on neonatal outcomes. <i>Am J Obstet Gynecol MFM</i> . 2021;3(5):100426. | Wrong intervention group of interest (i.e., administration of ACS was at $\geq 34+0$ weeks of gestational age) |
| Gulersen M, Gyamfi-Bannerman C, Greenman M, Lenchner E, Rochelson B, Bornstein E. 881 Practice patterns in the administration of late preterm antenatal corticosteroids. <i>Am J Obstet Gynecol</i> . 2021;224(2 Supplement):S546-S547.                       | Wrong intervention group of interest (i.e., administration of ACS was at $\geq 34+0$ weeks of gestational age) |
| Guo X, Li X, Qi T, et al. A birth population-based survey of preterm morbidity and mortality by gestational age. <i>BMC Pregnancy Childbirth</i> . 2021;21(1):291.                                                                                            | Wrong intervention group of interest (i.e., no details on ACS exposure)                                        |
| Hong JGS, Tan PC, Kamarudin M, Omar SZ. Prophylactic metformin after antenatal corticosteroids (PROMAC): a double blind randomized controlled trial. <i>BMC Pregnancy Childbirth</i> . 2021;21(1):138.                                                        | Wrong intervention group of interest (i.e., administration of ACS was at $\geq 34+0$ weeks of gestational age) |
| Kongprayoon P, Tilagul T. The effect of antenatal dexamethasone to improve respiratory neonatal outcomes in late preterm birth: A randomized controlled trial. <i>J Med Assoc Thai</i> . 2021;104(4).                                                         | Wrong intervention group of interest (i.e., administration of ACS was at $\geq 34+0$ weeks of gestational age) |
| Liang FW, Tsai HF, Kuo PL, Tsai PY. Antenatal corticosteroid therapy in late preterm delivery: a nationwide population-based retrospective study in Taiwan. <i>BJOG</i> . 2021;128(9):1497-1502.                                                              | Wrong intervention group of interest (i.e., administration of ACS was at $\geq 34+0$ weeks of gestational age) |
| Sahaf F, Zakariya N. The effect of antenatal betamethasone on prevention of neonatal respiratory distress syndrome before elective cesarean section at term. <i>J Clin Neonat</i> . 2021;10(4):220-226.                                                       | Wrong intervention group of interest (i.e., administration of ACS was at $\geq 34+0$ weeks of gestational age) |
| Sukarna N, Tan PC, Hong JGS, Sulaiman S, Omar SZ. Glycemic control following two regimens of antenatal corticosteroids in mild gestational diabetes: a randomized controlled trial. <i>Arch Gynecol Obstet</i> . 2021;304(2):345-353.                         | Wrong intervention group of interest (i.e., no details on ACS exposure for population of interest)             |
| Thomas J, Olukade TO, Naz A, et al. The neonatal respiratory morbidity associated with early term caesarean section - an emerging pandemic. <i>J Perinat Med</i> . 2021;49(7):767-772.                                                                        | Wrong intervention group of interest (i.e., no ACS exposure)                                                   |
| Elbohoty SB, Dawood AS, Abbas AM, Elgergawy AE. The neonatal outcomes of Dexamethasone administration before scheduled cesarean delivery at term: a randomized clinical trial. <i>Int J Reprod Contracept Obstet Gynecol</i> . 2020;9(3):1222-1227.           | Wrong intervention group of interest (i.e., administration of ACS was at $\geq 34+0$ weeks of gestational age) |

|                                                                                                                                                                                                                                                                                                                                                                                                                                                                                |                                                                                                                |
|--------------------------------------------------------------------------------------------------------------------------------------------------------------------------------------------------------------------------------------------------------------------------------------------------------------------------------------------------------------------------------------------------------------------------------------------------------------------------------|----------------------------------------------------------------------------------------------------------------|
| Hutcheon JA, Harper S, Liauw J, Skoll MA, Srour M, Strumpf EC. Antenatal corticosteroid administration and early school age child development: A regression discontinuity study in British Columbia, Canada. <i>PLoS Med.</i> 2020;17(12):e1003435.                                                                                                                                                                                                                            | Wrong intervention group of interest (i.e., no ACS exposure)                                                   |
| Mirzamoradi M, Joshaghani Z, Hasani Nejhada F, Vafaeenia M, Heidar Z. Evaluation of the effect of antenatal betamethasone on neonatal respiratory morbidity in early-term elective cesarean. <i>J Matern Fetal Neonatal Med.</i> 2020;33(12):1994-1999.                                                                                                                                                                                                                        | Wrong intervention group of interest (i.e., administration of ACS was at $\geq 34+0$ weeks of gestational age) |
| Plunkett BA. 71: The association of labor with neonatal respiratory outcomes at 36-40 weeks gestation. <i>Am J Obstet Gynecol.</i> 2019;220(1 Supplement):S57-S58.                                                                                                                                                                                                                                                                                                             | Wrong intervention group of interest (i.e., no ACS exposure)                                                   |
| Sand SA, Ernst A, Lunddorf LLH, Brix N, Gaml-Sorensen A, Ramlau-Hansen CH. In Utero Exposure to Glucocorticoids and Pubertal Timing in Sons and Daughters. <i>Sci Rep.</i> 2019;9(1):20374.                                                                                                                                                                                                                                                                                    | Wrong intervention group of interest (i.e., no details on ACS exposure for population of interest)             |
| Isrctn. Is there a difference between 2 doses of 12 mg of dexamethasone given 12 hours apart compared with 4 doses of 6 mg dexamethasone given 12 hours apart in terms of the dosing regimen's impact on causing high blood sugar in the mother when dexamethasone is given to minimise risk of prematurity complications? <a href="https://trialssearchwho.int/Trial2.aspx?TrialID=ISRCTN16613220">https://trialssearchwho.int/Trial2.aspx?TrialID=ISRCTN16613220</a> . 2018. | Wrong intervention group of interest (i.e., administration of ACS was at $\geq 34+0$ weeks of gestational age) |
| Mirzamoradi M, Hasani Nejhada F, Jamali R, Heidar Z, Bakhtiyari M. Evaluation of the effect of antenatal betamethasone on neonatal respiratory morbidities in late preterm deliveries (34–37 weeks). <i>J Matern Fetal Neonatal Med.</i> 2018.                                                                                                                                                                                                                                 | Wrong intervention group of interest (i.e., administration of ACS was at $\geq 34+0$ weeks of gestational age) |
| Nct. Effect of Antenatal Corticosteroids on Neonatal Morbidity. <a href="https://clinicaltrials.gov/show/NCT03446937">https://clinicaltrials.gov/show/NCT03446937</a> . 2018.                                                                                                                                                                                                                                                                                                  | Wrong intervention group of interest (i.e., administration of ACS was at $\geq 34+0$ weeks of gestational age) |
| Ontela V, Dorairajan G, Bhat VB, Chinnakali P. Effect of Antenatal Steroids on Respiratory Morbidity of Late Preterm Newborns: A Randomized Controlled Trial. <i>J Trop Pediatr.</i> 2018;64(6):531-538.                                                                                                                                                                                                                                                                       | Wrong intervention group of interest (i.e., administration of ACS was at $\geq 34+0$ weeks of gestational age) |
| Laugesen K, Byrjalsen A, Froslev T, Olsen MS, Sorensen HT. Use of glucocorticoids during pregnancy and risk of attention-deficit/hyperactivity disorder in offspring: a nationwide Danish cohort study. <i>BMJ Open.</i> 2017;7(9):e016825.                                                                                                                                                                                                                                    | Wrong intervention group of interest (i.e., no ACS exposure)                                                   |
| Patel A, Prakash AA, Pusdekar YV, Kulkarni H, Hibberd P. Detection and risk stratification of women at high risk of preterm birth in rural communities near Nagpur, India. <i>BMC Pregnancy Childbirth.</i> 2017;17(1):311.                                                                                                                                                                                                                                                    | Wrong intervention group of interest (i.e., administration of ACS was at $\geq 34+0$ weeks of gestational age) |

|                                                                                                                                                                                                                                                                                           |                                                                                                                |
|-------------------------------------------------------------------------------------------------------------------------------------------------------------------------------------------------------------------------------------------------------------------------------------------|----------------------------------------------------------------------------------------------------------------|
| Srinivasjois R, Nembhard W, Wong K, Bourke J, Pereira G, Leonard H. Risk of Mortality into Adulthood According to Gestational Age at Birth. <i>J Pediatr.</i> 2017;190:185.                                                                                                               | Wrong intervention group of interest (i.e., no ACS exposure)                                                   |
| University of North Carolina CH, Health EKSNIoC, Development H. Euglycemia After Antenatal Late Preterm Steroids, the E-ALPS Study. <a href="https://ClinicalTrials.gov/show/NCT03076775">https://ClinicalTrials.gov/show/NCT03076775</a> ; 2017.                                         | Wrong intervention group of interest (i.e., administration of ACS was at $\geq 34+0$ weeks of gestational age) |
| Baer R, Rogers E, Partridge J, et al. Population-based risks of mortality and preterm morbidity by gestational age and birth weight. <i>J Perinatol.</i> 2016;36(11):1008-1013.                                                                                                           | Wrong intervention group of interest (i.e., administration of ACS was at $\geq 34+0$ weeks of gestational age) |
| Ctri. Effect of antenatal corticosteroids on respiratory morbidity in late preterm newborns- a randomized controlled trial. <a href="https://trialssearchwho.int/Trial2.aspx?TrialID=CTRI/2016/12/007570">https://trialssearchwho.int/Trial2.aspx?TrialID=CTRI/2016/12/007570</a> . 2016. | Wrong intervention group of interest (i.e., administration of ACS was at $\geq 34+0$ weeks of gestational age) |
| Gyamfi-Bannerman C, Thom EA, Blackwell SC, et al. Antenatal Betamethasone for Women at Risk for Late Preterm Delivery. <i>N Engl J Med.</i> 2016;374(14):1311-20.                                                                                                                         | Wrong intervention group of interest (i.e., administration of ACS was at $\geq 34+0$ weeks of gestational age) |
| van de Mheen L, Ravelli AC, Oudijk MA, et al. Prediction of Time to Delivery Week-by-Week in Women with a Triplet Pregnancy. <i>Am J Perinatol.</i> 2016;33(14):1394-1400.                                                                                                                | Wrong intervention group of interest (i.e., no ACS exposure)                                                   |
| Attawattanakul N, Tansupswatdikul P. Effects of antenatal dexamethasone on respiratory distress in late preterm infant: a randomized controlled trial. <i>Thai journal of obstetrics and gynaecology.</i> 2015;23:25-33.                                                                  | Wrong intervention group of interest (i.e., administration of ACS was at $\geq 34+0$ weeks of gestational age) |
| Boyle EM, Johnson S, Manktelow B, et al. Neonatal outcomes and delivery of care for infants born late preterm or moderately preterm: a prospective population-based study. <i>Arch Dis Child Fetal Neonatal Ed.</i> 2015;100(6):F479-F485.                                                | Wrong intervention group of interest (i.e., administration of ACS was at $\geq 34+0$ weeks of gestational age) |
| Atarod Z, Taghipour M, Roohanizadeh H, Fadavi S, Taghavipour M. Effects of single course and multicourse betamethasone prior to birth in the prognosis of the preterm neonates: A randomized, double-blind placebo-control clinical trial study. <i>J Res Med Sci.</i> 2014;19(8):715-9.  | Wrong intervention group of interest (i.e., administration of ACS was at $\geq 34+0$ weeks of gestational age) |
| Byrjalsen A, Froslev T, Andersen ABT, Olsen M, Sorensen HT. Use of corticosteroids during pregnancy and risk of asthma in offspring: a nationwide Danish cohort study. <i>Bmj Open.</i> 2014;4(6):7. e005053.                                                                             | Wrong intervention group of interest (i.e., no ACS exposure)                                                   |
| Greene NH, Pedersen LH, Liu SM, Olsen J. Prenatal prescription corticosteroids and offspring diabetes: A national cohort study. <i>Int J Epidemiol.</i> 2013;42(1):186-193.                                                                                                               | Wrong intervention group of interest (i.e., no ACS exposure)                                                   |

|                                                                                                                                                                                                                                                                                                                  |                                                                                                                |
|------------------------------------------------------------------------------------------------------------------------------------------------------------------------------------------------------------------------------------------------------------------------------------------------------------------|----------------------------------------------------------------------------------------------------------------|
| Stutchfield PR, Whitaker R, Gliddon AE, Hobson L, Kotecha S, Doull IJ. Behavioural, educational and respiratory outcomes of antenatal betamethasone for term caesarean section (ASTECS trial). <i>Arch Dis Child Fetal Neonatal Ed.</i> 2013;98(3):F195-200.                                                     | Wrong intervention group of interest (i.e., administration of ACS was at $\geq 34+0$ weeks of gestational age) |
| Daw JR, Mintzes B, Law MR, Hanley GE, Morgan SG. Prescription drug use in pregnancy: a retrospective, population-based study in British Columbia, Canada (2001-2006). <i>Clin Ther.</i> 2012;34(1):239-249.e2.                                                                                                   | Wrong intervention group of interest (i.e., no ACS exposure)                                                   |
| Hantoushzadeh S, Javadian P, Salmanian B, et al. Betamethasone effects on the endocervical inflammatory cytokines in preterm labor: a randomized clinical trial. <i>Int Immunopharmacol.</i> 2011;11(8):1116-9.                                                                                                  | Wrong intervention group of interest (i.e., administration of ACS was at $\geq 34+0$ weeks of gestational age) |
| Porto AM, Coutinho IC, Correia JB, Amorim MM. Effectiveness of antenatal corticosteroids in reducing respiratory disorders in late preterm infants: randomised clinical trial. <i>BMJ.</i> 2011;342:d1696.                                                                                                       | Wrong intervention group of interest (i.e., administration of ACS was at $\geq 34+0$ weeks of gestational age) |
| Irct138901193666N. Effect of antenatal betamethasone on prevention of respiratory distress syndrome among neonates with gestational age of 35-36weeks. <a href="https://trialsearchwho.int/Trial2.aspx?TrialID=IRCT138901193666N1">https://trialsearchwho.int/Trial2.aspx?TrialID=IRCT138901193666N1</a> . 2010. | Wrong intervention group of interest (i.e., administration of ACS was at $\geq 34+0$ weeks of gestational age) |
| Shanks A, Gross G, Shim T, Allsworth J, Sadovsky Y, Bildirici I. Administration of steroids after 34 weeks of gestation enhances fetal lung maturity profiles. <i>Am J Obstet Gynecol.</i> 2010;203(1):47.e1-5.                                                                                                  | Wrong intervention group of interest (i.e., administration of ACS was at $\geq 34+0$ weeks of gestational age) |
| Kashanian M, Dadkhah F, Mokhtari F. Effect of intramuscular administration of dexamethasone on the duration of labor. <i>Int J Gynaecol Obstet.</i> 2008;102(3):259-62.                                                                                                                                          | Wrong intervention group of interest (i.e., administration of ACS was at $\geq 34+0$ weeks of gestational age) |
| Kashanian M, Fekrat M, Naghghash S, Ansari NS. Evaluation of the effect of extra-amniotic normal saline infusion alone or in combination with dexamethasone for the induction of labor. <i>J Obstet Gynaecol Res.</i> 2008;34(1):47-50.                                                                          | Wrong intervention group of interest (i.e., no ACS exposure)                                                   |
| Grgic G, Fatusic Z, Bogdanovic G. [Stimulation of fetal lung maturation with dexamethasone in unexpected premature labor]. <i>Med Arh.</i> 2003;57(5-6):291-4.                                                                                                                                                   | Wrong intervention group of interest (i.e., administration of ACS was at $\geq 34+0$ weeks of gestational age) |
| Hofer OJ, Harding JE, Tran T, Crowther CA. Maternal and infant morbidity following administration of repeat dexamethasone or betamethasone prior to preterm birth: A secondary analysis of the ASTEROID Trial. <i>PLoS ONE.</i> 2022;17(2):e0263927.                                                             | Wrong study design (i.e., secondary analysis of a randomized controlled trial including a subgroup of data)    |

|                                                                                                                                                                                                                                                                                                                                                                                      |                                                                                                             |
|--------------------------------------------------------------------------------------------------------------------------------------------------------------------------------------------------------------------------------------------------------------------------------------------------------------------------------------------------------------------------------------|-------------------------------------------------------------------------------------------------------------|
| Oladapo OT, Vogel JP, Piaggio G, Nguyen MH, Althabe F, Bahl R, Rao SP, De Costa A, Gupta S, Baqui AH, Shahidullah M. Effect of dexamethasone on newborn survival at different administration-to-birth intervals: A secondary analysis of the WHO ACTION (Antenatal Corticosteroids for Improving Outcomes in Preterm Newborn)-I trial. <i>EClinicalMedicine</i> . 2022;53(1):101744. | Wrong study design (i.e., secondary analysis of a randomized controlled trial including a subgroup of data) |
| Battarbee AN, Glover AV, Vladutiu CJ, et al. Risk factors associated with prolonged neonatal intensive care unit stay after threatened late preterm birth. <i>J Matern Fetal Neonatal Med</i> . 2021;34(7):1042-1047.                                                                                                                                                                | Wrong study design (i.e., secondary analysis of a randomized controlled trial including a subgroup of data) |
| Fishel Bartal M, Chen HY, Blackwell SC, Chauhan SP, Sibai BM. Neonatal morbidity in late preterm small for gestational age neonates. <i>J Matern Fetal Neonatal Med</i> . 2021;34(19):3208-3213.                                                                                                                                                                                     | Wrong study design (i.e., secondary analysis of a randomized controlled trial including a subgroup of data) |
| Gyamfi-Bannerman C, Jablonski KA, Blackwell SC, et al. Evaluation of Hypoglycemia in Neonates of Women at Risk for Late Preterm Delivery: An Antenatal Late Preterm Steroids Trial Cohort Study. <i>Am J Perinatol</i> . 2021;27:27.                                                                                                                                                 | Wrong study design (i.e., secondary analysis of a randomized controlled trial including a subgroup of data) |
| Hofer OJ, McKinlay CJD, Tran T, Crowther CA. Antenatal corticosteroids, maternal body mass index and infant morbidity within the ASTEROID trial. <i>Aust N Z J Obstet Gynaecol</i> . 2021;61(3):380-5.                                                                                                                                                                               | Wrong study design (i.e., secondary analysis of a randomized controlled trial including a subgroup of data) |
| Robbins LS, Blanchard CT, Sinkey RG, Harris SL, Tita AT, Harper LM. Prenatal Tobacco Exposure and Childhood Neurodevelopment among Infants Born Prematurely. <i>Am J Perinatol</i> . 2021;38(3):218-223.                                                                                                                                                                             | Wrong study design (i.e., secondary analysis of a randomized controlled trial including a subgroup of data) |
| Son SL, Allshouse AA, Heinrichs GA, et al. Is Exposure to Intrapartum Prostaglandins for Labor Induction Associated with a Lower Incidence of Neonatal Respiratory Distress Syndrome? <i>Am J Perinatol</i> . 2021;38(10):993-998.                                                                                                                                                   | Wrong study design (i.e., secondary analysis of a randomized controlled trial including a subgroup of data) |
| Zafarmand MH, Goossens S, Tajik P, Bossuyt PMM, Asztalos EV, Gardener GJ, et al. Planned Cesarean or planned vaginal delivery for twins: secondary analysis of randomized controlled trial. <i>Ultrasound Obstet Gynecol</i> . 2021;57(4):582-91.                                                                                                                                    | Wrong study design (i.e., secondary analysis of a randomized controlled trial including a subgroup of data) |
| Battarbee AN, Anderson SB, Tita ATN, Harper LM. Methods of Glycemic Control and Neonatal Outcomes after Antenatal Corticosteroid Administration among Women with Pregestational Diabetes. <i>Am J Perinatol</i> . 2020;37(13):1351-1356.                                                                                                                                             | Wrong study design (i.e., secondary analysis of a randomized controlled trial including a subgroup of data) |
| Battarbee AN, Ros ST, Esplin MS, et al. Optimal timing of antenatal corticosteroid administration and preterm neonatal and early childhood outcomes. <i>Am J Obstet Gynecol MFM</i> . 2020;2(1):100077.                                                                                                                                                                              | Wrong study design (i.e., secondary analysis of a randomized controlled trial including a subgroup of data) |

|                                                                                                                                                                                                                                                                                                                          |                                                                                                             |
|--------------------------------------------------------------------------------------------------------------------------------------------------------------------------------------------------------------------------------------------------------------------------------------------------------------------------|-------------------------------------------------------------------------------------------------------------|
| Bicocca MJ, Blackwell SC, Sibai BM. Does Prepregnancy Weight or Maternal BMI at Betamethasone Administration Impact Late Preterm Respiratory Morbidity? <i>Am J Perinatol.</i> 2020;37(4):365-369.                                                                                                                       | Wrong study design (i.e., secondary analysis of a randomized controlled trial including a subgroup of data) |
| Fishel Bartal M, Chen HY, Blackwell SC, Chauhan SP, Sibai BM. Factors Associated with Formula Feeding among Late Preterm Neonates. <i>Am J Perinatol.</i> 2020;37(14):1393-1399.                                                                                                                                         | Wrong study design (i.e., secondary analysis of a randomized controlled trial including a subgroup of data) |
| Harris C, Lunt A, Bisquera A, Peacock J, Greenough A. Lung function and exercise capacity in prematurely born young people. <i>Pediatr Pulmonol.</i> 2020;55(9):2289-2295.                                                                                                                                               | Wrong study design (i.e., secondary analysis of a randomized controlled trial including a subgroup of data) |
| Andrikopoulou M, Overton EE, Seaman SJ, Stern-Ascher CN, Bannerman CG. 335: Does race affect late preterm neonatal respiratory morbidity? <i>Am J Obstet Gynecol.</i> 2019;220(1 Supplement):S233-S234.                                                                                                                  | Wrong study design (i.e., secondary analysis of a randomized controlled trial including a subgroup of data) |
| Battarbee AN, Glover AV, Vladutiu CJ, et al. Sex-Specific Differences in Late Preterm Neonatal Outcomes. <i>Am J Perinatol.</i> 2019;36(12):1223-1228.                                                                                                                                                                   | Wrong study design (i.e., secondary analysis of a randomized controlled trial including a subgroup of data) |
| Cartwright RD, Crowther CA, Anderson PJ, Harding JE, Doyle LW, McKinlay CJD. Association of Fetal Growth Restriction With Neurocognitive Function After Repeated Antenatal Betamethasone Treatment vs Placebo: Secondary Analysis of the ACTORDS Randomized Clinical Trial. <i>JAMA Network Open.</i> 2019;2(2):e187636. | Wrong study design (i.e., secondary analysis of a randomized controlled trial including a subgroup of data) |
| Gyamfi-Bannerman C, Zupancic JAF, Sandoval G, Grobman WA, Blackwell SC, Tita ATN, et al. Cost-effectiveness of Antenatal Corticosteroid Therapy vs No Therapy in Women at Risk of Late Preterm Delivery: A Secondary Analysis of a Randomized Clinical Trial. <i>JAMA Pediatr.</i> 2019;173(5):462-8.                    | Wrong study design (i.e., secondary analysis of a randomized controlled trial including a subgroup of data) |
| Werner EF, Romano ME, Rouse DJ, et al. Association of Gestational Diabetes Mellitus With Neonatal Respiratory Morbidity. <i>Obstet Gynecol.</i> 2019;133(2):349-353.                                                                                                                                                     | Wrong study design (i.e., secondary analysis of a randomized controlled trial including a subgroup of data) |
| Cartwright RD, Harding JE, Crowther CA, Cutfield WS, Battin MR, Dalziel SR, et al. Repeat Antenatal Betamethasone and Cardiometabolic Outcomes. <i>Pediatrics.</i> 2018;142(1):07.                                                                                                                                       | Wrong study design (i.e., secondary analysis of a randomized controlled trial including a subgroup of data) |
| Glover AV, Battarbee AN, Gyamfi-Bannerman C, Boggess KA, Manuck TA. True vs. false spontaneous preterm labor in the late preterm period: Predicting late preterm birth. <i>Am J Obstet Gynecol.</i> 2018;218(1 Supplement 1):S403.                                                                                       | Wrong study design (i.e., secondary analysis of a randomized controlled trial including a subgroup of data) |

|                                                                                                                                                                                                                                                                                                                           |                                                                                                             |
|---------------------------------------------------------------------------------------------------------------------------------------------------------------------------------------------------------------------------------------------------------------------------------------------------------------------------|-------------------------------------------------------------------------------------------------------------|
| Jordan BK, Schilling D, McEvoy CT. The window of improved neonatal respiratory compliance after rescue antenatal steroids. <i>J Perinatol.</i> 2018;38(7):828-33.                                                                                                                                                         | Wrong study design (i.e., secondary analysis of a randomized controlled trial including a subgroup of data) |
| Althabe F, Thorsten V, Klein K, McClure EM, Hibberd PL, Goldenberg RL, et al. The Antenatal Corticosteroids Trial (ACT)'s explanations for neonatal mortality - a secondary analysis. <i>Reproductive Health.</i> 2016;13(1):62.                                                                                          | Wrong study design (i.e., secondary analysis of a randomized controlled trial including a subgroup of data) |
| Goldenberg RL, Thorsten VR, Althabe F, Saleem S, Garces A, Carlo WA, et al. The global network antenatal corticosteroids trial: impact on stillbirth. <i>Reproductive Health.</i> 2016;13(1):68.                                                                                                                          | Wrong study design (i.e., secondary analysis of a randomized controlled trial including a subgroup of data) |
| Klein K, McClure EM, Colaci D, Thorsten V, Hibberd PL, Esamai F, et al. The Antenatal Corticosteroids Trial (ACT): a secondary analysis to explore site differences in a multi-country trial. <i>Reproductive Health.</i> 2016;13(1):64.                                                                                  | Wrong study design (i.e., secondary analysis of a randomized controlled trial including a subgroup of data) |
| Viteri OA, Blackwell SC, Chauhan SP, Refuerzo JS, Pedroza C, Salazar XC, Sibai BM. Antenatal corticosteroids for the prevention of respiratory distress syndrome in premature twins. <i>Obstet Gynecol.</i> 2016;128(3):583-91.                                                                                           | Wrong study design (i.e., secondary analysis of a randomized controlled trial including a subgroup of data) |
| Brookfield KF, El-Sayed YY, Chao L, Berger V, Naqvi M, Butwick AJ. Antenatal corticosteroids for preterm premature rupture of membranes: single or repeat course? <i>Am J Perinatol.</i> 2015;32(6):537-44.                                                                                                               | Wrong study design (i.e., secondary analysis of a randomized controlled trial including a subgroup of data) |
| Wilms FF, van Baaren GJ, Vis JY, Oudijk MA, Kwee A, Porath MM, et al. Prescribing patterns of antenatal corticosteroids in women with threatened preterm labor. <i>Eur J Obstet Gynecol Reprod Biol.</i> 2015;192:47-53.                                                                                                  | Wrong study design (i.e., secondary analysis of a randomized controlled trial including a subgroup of data) |
| Asztalos E, Willan A, Murphy K, Matthews S, Ohlsson A, Saigal S, et al. Association between gestational age at birth, antenatal corticosteroids, and outcomes at 5 years: multiple courses of antenatal corticosteroids for preterm birth study at 5 years of age (MACS-5). <i>BMC Pregnancy Childbirth.</i> 2014;14:272. | Wrong study design (i.e., secondary analysis of a randomized controlled trial including a subgroup of data) |
| Gyamfi-Bannerman C, Son M. Preterm premature rupture of membranes and the rate of neonatal sepsis after two courses of antenatal corticosteroids. <i>Obstet Gynecol.</i> 2014;124(5):999-1003.                                                                                                                            | Wrong study design (i.e., secondary analysis of a randomized controlled trial including a subgroup of data) |
| Murphy KE, Willan AR, Hannah ME, Ohlsson A, Kelly EN, Matthews SG, et al. Effect of antenatal corticosteroids on fetal growth and gestational age at birth. <i>Obstet Gynecol.</i> 2012;119(5):917-23.                                                                                                                    | Wrong study design (i.e., secondary analysis of a randomized controlled trial including a subgroup of data) |

|                                                                                                                                                                                                                                                      |                                                                                                             |
|------------------------------------------------------------------------------------------------------------------------------------------------------------------------------------------------------------------------------------------------------|-------------------------------------------------------------------------------------------------------------|
| Schmidt B, Seshia M, Shankaran S, et al. Effects of prophylactic indomethacin in extremely low-birth-weight infants with and without adequate exposure to antenatal corticosteroids. <i>Arch Pediatr Adolesc Med.</i> 2011;165(7):642-6.             | Wrong study design (i.e., secondary analysis of a randomized controlled trial including a subgroup of data) |
| Hashima JN, Lai Y, Wapner RJ, Sorokin Y, Dudley DJ, Peaceman A, et al. The effect of maternal body mass index on neonatal outcome in women receiving a single course of antenatal corticosteroids. <i>Am J Obstet Gynecol.</i> 2010;202(3):263.e1-5. | Wrong study design (i.e., secondary analysis of a randomized controlled trial including a subgroup of data) |
| Lee MJ, Davies J, Guinn D, Sullivan L, Atkinson MW, McGregor S, et al. Single versus weekly courses of antenatal corticosteroids in preterm premature rupture of membranes. <i>Obstet Gynecol.</i> 2004;103(2):274-81.                               | Wrong study design (i.e., secondary analysis of a randomized controlled trial including a subgroup of data) |

**Legend:**

ACS – antenatal corticosteroids

<sup>a</sup> References are listed for studies excluded due to the wrong intervention group, wrong population, and studies with the wrong study design (secondary analyses of randomized controlled trials). Other studies were excluded due to the following reasons: 1) only abstracts were available; 2) other studies with wrong study design (e.g., single-centred cohort studies); or 3) no outcomes of interest for included infants born at term and/or late preterm



**eAppendix 3: List of pre-specified outcomes in a systematic review and meta-analysis on term, late preterm, and term/late preterm births after early exposure to antenatal corticosteroids**

| Type of outcome                                                  |                               | Pre-specified outcomes                                                                                                          |
|------------------------------------------------------------------|-------------------------------|---------------------------------------------------------------------------------------------------------------------------------|
| <b>Proportion data</b>                                           | Primary outcome               | Proportion of infants born at term after exposure to ACS                                                                        |
|                                                                  | Secondary proportion outcomes | Proportion of infants born late preterm after exposure to ACS                                                                   |
|                                                                  |                               | Proportion of infants born at term/late preterm (combined) after exposure to ACS                                                |
| <b>Other outcomes</b>                                            | Secondary short-term outcomes | Perinatal death (stillbirth or neonatal death)                                                                                  |
|                                                                  |                               | Stillbirth (intrauterine/fetal demise)                                                                                          |
|                                                                  |                               | Neonatal death ( $\leq 28$ days after birth or before discharge)                                                                |
|                                                                  |                               | Severe RDS in survivors (as defined by study authors)                                                                           |
|                                                                  |                               | Moderate/severe RDS (as defined by study authors)                                                                               |
|                                                                  |                               | Intraventricular haemorrhage (grade III or IV)                                                                                  |
|                                                                  |                               | Intraventricular haemorrhage (any grade)                                                                                        |
|                                                                  |                               | Surfactant use                                                                                                                  |
|                                                                  |                               | Chronic lung disease (infant's need for continuous supplemental oxygen at 28 weeks postnatal age or 36 weeks postmenstrual age) |
|                                                                  |                               | Need for MV/ CPAP                                                                                                               |
|                                                                  |                               | Mean duration of MV/CPAP (days)                                                                                                 |
|                                                                  |                               | Duration of oxygen supplementation                                                                                              |
|                                                                  |                               | Systemic infection in first 48 hours of life                                                                                    |
|                                                                  |                               | Proven infection in the NICU                                                                                                    |
|                                                                  |                               | cPVL (as defined by study authors)                                                                                              |
|                                                                  |                               | Admission to NICU                                                                                                               |
|                                                                  |                               | 5 min APGAR score $< 7$                                                                                                         |
|                                                                  |                               | Small for gestational age (as defined by study authors)                                                                         |
|                                                                  |                               | Length of hospital stay (days)                                                                                                  |
|                                                                  |                               | Birthweight (g)                                                                                                                 |
|                                                                  |                               | Head circumference (cm)                                                                                                         |
|                                                                  |                               | Body length at birth (cm)                                                                                                       |
|                                                                  |                               | Hypoglycemia (infant's need for oral or intravenous glucose or glucagon administration within 7 days)                           |
| Other reported short-term outcomes (as defined by study authors) |                               |                                                                                                                                 |

|                              |                                                             |
|------------------------------|-------------------------------------------------------------|
| Secondary long-term outcomes | Neurodevelopmental impairment (as defined by study authors) |
|                              | Cerebral palsy (as defined by study authors)                |
|                              | Auditory impairment (as defined by study authors)           |
|                              | Visual impairment (as defined by study authors)             |
|                              | Others long-term outcomes (as defined by study authors)     |
| Secondary maternal outcomes  | Maternal death (death up to 90 days after birth)            |
|                              | Chorioamnionitis (as defined by study authors)              |
|                              | Endometritis (as defined by study authors)                  |
|                              | Postpartum depression (as defined by study authors)         |

**Legend:**

ACS – antenatal corticosteroids; cm – centimetres; CPAP – continuous positive airway pressure; cPVL – cystic periventricular leukomalacia; g – grams; MV – mechanical ventilation; NICU – neonatal intensive care unit; RDS – respiratory distress syndrome

**eAppendix 4: Confounders/co-variates for adjusted and proportion analyses addressed within included population-based studies and randomized studies in a systematic review and meta-analysis on term, late preterm, and term/late preterm births after early exposure to antenatal corticosteroids**

| Study, Year (Country)                                  | Outcomes                                                                                                                                                                                                        | Multiple gestation | Preeclampsia/severe hypertension | Fetal anomalies | IUGR | PPROM                                                                                                                                                                      | Other factors                                                                                                                                                                                                                                                                                                                    |
|--------------------------------------------------------|-----------------------------------------------------------------------------------------------------------------------------------------------------------------------------------------------------------------|--------------------|----------------------------------|-----------------|------|----------------------------------------------------------------------------------------------------------------------------------------------------------------------------|----------------------------------------------------------------------------------------------------------------------------------------------------------------------------------------------------------------------------------------------------------------------------------------------------------------------------------|
| <b>Short-term outcomes<sup>a</sup></b>                 |                                                                                                                                                                                                                 |                    |                                  |                 |      |                                                                                                                                                                            |                                                                                                                                                                                                                                                                                                                                  |
| <b>Population-based studies – Infants born at term</b> |                                                                                                                                                                                                                 |                    |                                  |                 |      |                                                                                                                                                                            |                                                                                                                                                                                                                                                                                                                                  |
| Diguisto, 2020 (France) <sup>1</sup>                   | <ul style="list-style-type: none"> <li>• Head circumference &lt;5<sup>th</sup> percentile</li> <li>• Birth length &lt;5<sup>th</sup> percentile</li> <li>• Birthweight &lt;5<sup>th</sup> percentile</li> </ul> | <b>Adj</b>         | <b>Adj</b>                       | <b>E</b>        |      |                                                                                                                                                                            | <b>Adj:</b> Maternal age (20-34 y vs < 20 y vs ≥ 35 y), BMI (18.5-24.9 vs < 18.5 vs ≥ 25), smoking during pregnancy, pregnancy-related disorder, parity, family situation (living with partner: yes/no), geographic origin (France vs South of Europe vs North Africa, vs others countries), parity (nulliparous vs multiparous) |
| McKinzie, 2021 (U.S.A) <sup>2</sup>                    | <ul style="list-style-type: none"> <li>• Admission to NICU</li> <li>• Diagnosis of TTN</li> <li>• SGA</li> </ul>                                                                                                | <b>E</b>           | <b>Adj</b>                       |                 |      |                                                                                                                                                                            | <b>Adj:</b> Maternal age, race, insurance, maternal diabetes mellitus, maternal asthma, and EGA at delivery                                                                                                                                                                                                                      |
|                                                        | <ul style="list-style-type: none"> <li>• Treated hypoglycemia</li> <li>• Hyperbilirubinemia requiring treatment</li> <li>• Meconium aspiration syndrome</li> </ul>                                              |                    |                                  |                 |      | <b>Adj:</b> for multiple comparisons for the 4 secondary outcomes (intubation, hyperbilirubinemia requiring treatment, treated hypoglycemia, meconium aspiration syndrome) |                                                                                                                                                                                                                                                                                                                                  |

| Study, Year (Country)                                       | Outcomes                                                                                                                                                                       | Multiple gestation      | Preeclampsia/severe hypertension | Fetal anomalies | IUGR | PPROM | Other factors                                                                                                                                                                                                                                                                                                                                                                                                                        |
|-------------------------------------------------------------|--------------------------------------------------------------------------------------------------------------------------------------------------------------------------------|-------------------------|----------------------------------|-----------------|------|-------|--------------------------------------------------------------------------------------------------------------------------------------------------------------------------------------------------------------------------------------------------------------------------------------------------------------------------------------------------------------------------------------------------------------------------------------|
| Rodriguez, 2019 (Finland) <sup>3</sup>                      | <ul style="list-style-type: none"> <li>• Head circumference at birth (cm)</li> <li>• Birthweight (g)</li> <li>• Body length at birth (cm)</li> <li>• Ponderal index</li> </ul> | <b>E</b>                |                                  |                 |      |       | <b>M/Adj:</b> Social economic status, maternal age (years), cohabitation, maternal height (cm), prepregnancy weight (kg), prepregnancy BMI, number of previous pregnancies, number of miscarriages, number of induced abortions, number of ectopic pregnancies, ovum donation, insemination, glucose test performed, glucose test pathological, insulin treatment, self-reported smoking, hospitalization due to high BP, infant sex |
| <b>Total studies:</b>                                       |                                                                                                                                                                                | <b>E: 2;<br/>Adj: 1</b> | <b>Adj: 2</b>                    | <b>E: 1</b>     | None | None  |                                                                                                                                                                                                                                                                                                                                                                                                                                      |
| <b>Population-based studies – Infants born late preterm</b> |                                                                                                                                                                                |                         |                                  |                 |      |       |                                                                                                                                                                                                                                                                                                                                                                                                                                      |
| Malloy, 2012 (U.S.A) <sup>8</sup>                           | <ul style="list-style-type: none"> <li>• Neonatal death</li> <li>• Neonatal death within NICU admission group</li> </ul>                                                       | <b>Adj</b>              |                                  |                 |      |       | <b>Adj:</b> Maternal age, education, gravidity, race, mode of delivery, infant sex, birthweight, NICU admission, surfactant administration, assisted ventilation                                                                                                                                                                                                                                                                     |
| <b>Total studies</b>                                        |                                                                                                                                                                                | <b>Adj: 1</b>           | None                             | None            | None | None  |                                                                                                                                                                                                                                                                                                                                                                                                                                      |

| Study, Year (Country)                                                          | Outcomes                                                                                                                                                                       | Multiple gestation | Preeclampsia/severe hypertension | Fetal anomalies | IUGR | PPROM | Other factors                                                                                                                                                                                                                                                                                                                                                                                                                        |
|--------------------------------------------------------------------------------|--------------------------------------------------------------------------------------------------------------------------------------------------------------------------------|--------------------|----------------------------------|-----------------|------|-------|--------------------------------------------------------------------------------------------------------------------------------------------------------------------------------------------------------------------------------------------------------------------------------------------------------------------------------------------------------------------------------------------------------------------------------------|
| <b>Population-based studies – Infants born at term/late preterm (combined)</b> |                                                                                                                                                                                |                    |                                  |                 |      |       |                                                                                                                                                                                                                                                                                                                                                                                                                                      |
| Rodriguez, 2019 (Finland) <sup>3</sup>                                         | <ul style="list-style-type: none"> <li>• Head circumference at birth (cm)</li> <li>• Birthweight (g)</li> <li>• Body length at birth (cm)</li> <li>• Ponderal index</li> </ul> | <b>E</b>           |                                  |                 |      |       | <b>M/Adj:</b> Social economic status, maternal age (years), cohabitation, maternal height (cm), prepregnancy weight (kg), prepregnancy BMI, number of previous pregnancies, number of miscarriages, number of induced abortions, number of ectopic pregnancies, ovum donation, insemination, glucose test performed, glucose test pathological, insulin treatment, self-reported smoking, hospitalization due to high BP, infant sex |
| <b>Total studies</b>                                                           |                                                                                                                                                                                | <b>E: 1</b>        | None                             | None            | None | None  |                                                                                                                                                                                                                                                                                                                                                                                                                                      |

| Study, Year (Country)                                   | Outcomes                                                                                                                                                                                                                                                                                                                                                | Multiple gestation | Preeclampsia/ severe hypertension           | IUGR | PPROM      | Maternal substance abuse | Socioeconomic status | Other factors                                                                                                                                                                                                                                                                                                           |
|---------------------------------------------------------|---------------------------------------------------------------------------------------------------------------------------------------------------------------------------------------------------------------------------------------------------------------------------------------------------------------------------------------------------------|--------------------|---------------------------------------------|------|------------|--------------------------|----------------------|-------------------------------------------------------------------------------------------------------------------------------------------------------------------------------------------------------------------------------------------------------------------------------------------------------------------------|
| <b>Long-term outcomes<sup>b</sup></b>                   |                                                                                                                                                                                                                                                                                                                                                         |                    |                                             |      |            |                          |                      |                                                                                                                                                                                                                                                                                                                         |
| <b>Population-based studies – Children born at term</b> |                                                                                                                                                                                                                                                                                                                                                         |                    |                                             |      |            |                          |                      |                                                                                                                                                                                                                                                                                                                         |
| Melamed, 2019 (Canada) <sup>4</sup>                     | <ul style="list-style-type: none"> <li>• Composite long-term outcome of any of the following: audiometry testing, visual testing, suspected neurocognitive disorder</li> <li>• Suspected neurocognitive disorder</li> <li>• Audiometry testing AND suspected neurocognitive disorder</li> <li>• Visual testing</li> <li>• Audiometry testing</li> </ul> | <b>E</b>           | <b>Adj:</b> chronic hypertension            |      | <b>Adj</b> |                          | <b>Adj:</b> Income   | <b>Adj:</b> maternal age (as a continuous variable), week of gestation, parity, pregestational diabetes, hypertensive complications, gestational diabetes, induction of labour, mode of delivery, infant sex, birthweight <10 <sup>th</sup> percentile, 5 min Apgar score <7, resuscitation at birth, admission to NICU |
| Osteen, 2022 (U.S.A) <sup>7</sup>                       | <ul style="list-style-type: none"> <li>• Asthma</li> <li>• Weight &lt;10<sup>th</sup> percentile</li> </ul>                                                                                                                                                                                                                                             | <b>E</b>           | <b>Adj:</b> Maternal hypertensive disorders |      |            |                          |                      | <b>Adj:</b> Maternal age, maternal diabetes, SGA, EGA at delivery                                                                                                                                                                                                                                                       |

| Study, Year (Country)                  | Outcomes                                                                                                                                                                                                                                                                                                                                                                                                                                                                                                                                                                                                   | Multiple gestation | Preeclampsia/ severe hypertension | IUGR | PPROM      | Maternal substance abuse | Socioeconomic status | Other factors                                                                                                                                                                                                                                                                              |
|----------------------------------------|------------------------------------------------------------------------------------------------------------------------------------------------------------------------------------------------------------------------------------------------------------------------------------------------------------------------------------------------------------------------------------------------------------------------------------------------------------------------------------------------------------------------------------------------------------------------------------------------------------|--------------------|-----------------------------------|------|------------|--------------------------|----------------------|--------------------------------------------------------------------------------------------------------------------------------------------------------------------------------------------------------------------------------------------------------------------------------------------|
| Raikkonen, 2020 (Finland) <sup>6</sup> | <ul style="list-style-type: none"> <li>• Any mental and behavioural disorder</li> <li>• Psychological development disorders</li> <li>• Autism spectrum disorders</li> <li>• Attention-deficit/hyperactivity or conduct disorders</li> <li>• Mixed disorders of conduct and emotions; emotional, social functioning, or tic disorders</li> <li>• Other behavioural and emotional disorders</li> <li>• Psychotic, mood, neurotic, stress-related, or somatization disorders</li> <li>• Eating disorders</li> <li>• Sleep disorders</li> <li>• Mild, moderate, unspecified intellectual disability</li> </ul> | <b>E</b>           | <b>Adj</b>                        |      | <b>Adj</b> |                          |                      | <b>Adj:</b> Maternal age at delivery, parity, mode of delivery, maternal smoking during pregnancy, prepregnancy body mass index, gestational diabetes, any lifetime mental disorder diagnosis, child sex, Apgar score (maximum of 1 and 5 minutes), admission to NICU, weight, GA at birth |

| Study, Year (Country)                  | Outcomes                                                                                                                                                                                                                                                                                                                                                                                                                   | Multiple gestation | Preeclampsia/ severe hypertension | IUGR | PPROM      | Maternal substance abuse | Socioeconomic status | Other factors                                                                                                                                                                                                                                                                                                                                                                                          |
|----------------------------------------|----------------------------------------------------------------------------------------------------------------------------------------------------------------------------------------------------------------------------------------------------------------------------------------------------------------------------------------------------------------------------------------------------------------------------|--------------------|-----------------------------------|------|------------|--------------------------|----------------------|--------------------------------------------------------------------------------------------------------------------------------------------------------------------------------------------------------------------------------------------------------------------------------------------------------------------------------------------------------------------------------------------------------|
|                                        | <ul style="list-style-type: none"> <li>Severe, profound intellectual disability</li> </ul>                                                                                                                                                                                                                                                                                                                                 |                    |                                   |      |            |                          |                      |                                                                                                                                                                                                                                                                                                                                                                                                        |
| Raikkonen, 2022 (Finland) <sup>5</sup> | <ul style="list-style-type: none"> <li>Cerebral palsy</li> <li>Vision or hearing loss</li> <li>Specific developmental disorders of speech and language</li> <li>Specific developmental disorders of scholastic skill</li> <li>Specific developmental disorder of motor function</li> <li>Pervasive developmental disorder</li> <li>Other or unspecified disorder of psychological development</li> <li>Epilepsy</li> </ul> | <b>E</b>           | <b>Adj</b>                        |      | <b>Adj</b> |                          |                      | <p><b>Adj:</b> Maternal age at delivery, parity, mode of delivery, maternal smoking during pregnancy, prepregnancy body mass index, gestational diabetes, child sex, Apgar score (maximum of 1 and 5 minutes), admission to NICU, weight, GA at birth</p> <p>For child psychological developmental disorders, <b>adj:</b> maternal mental and behavioral disorder diagnoses (ICD-10 codes F00-F99)</p> |



| Study, Year (Country)                                        | Outcomes                                                                                                                                    | Multiple gestation | Preeclampsia/severe hypertension | IUGR | PPROM         | Maternal substance abuse | Socioeconomic status                                                                   | Other factors                                                                                                                                                                                                                                                    |
|--------------------------------------------------------------|---------------------------------------------------------------------------------------------------------------------------------------------|--------------------|----------------------------------|------|---------------|--------------------------|----------------------------------------------------------------------------------------|------------------------------------------------------------------------------------------------------------------------------------------------------------------------------------------------------------------------------------------------------------------|
|                                                              |                                                                                                                                             |                    |                                  |      |               |                          |                                                                                        | For child vision and hearing disorders, <b>adj:</b> maternal eye, adnexa, ear, and mastoid disorder diagnoses (ICD-10 codes H00-H95)<br><br>For child epilepsy and cerebral palsy, <b>adj:</b> maternal nervous system disorder diagnoses (ICD-10 codes G00-G99) |
| <b>Total studies:</b>                                        |                                                                                                                                             | <b>E:</b> 4        | <b>Adj:</b> 4                    | None | <b>Adj:</b> 3 | None                     | <b>Adj:</b> 1                                                                          |                                                                                                                                                                                                                                                                  |
| <b>Population-based studies – Children born late preterm</b> |                                                                                                                                             |                    |                                  |      |               |                          |                                                                                        |                                                                                                                                                                                                                                                                  |
| Aviram, 2022 (Canada) <sup>9</sup>                           | <ul style="list-style-type: none"> <li>• Suspected neurocognitive disorder</li> <li>• Auditory testing</li> <li>• Visual testing</li> </ul> | <b>E</b>           | <b>Adj:</b> chronic hypertension |      | <b>Adj</b>    |                          | <b>Adj:</b> Household income (based on neighbourhood level and divided into quintiles) | <b>E:</b> Fetal anomalies, deliveries complicated by intrapartum asphyxia                                                                                                                                                                                        |

| Study, Year (Country) | Outcomes | Multiple gestation | Preeclampsia/severe hypertension | IUGR | PPROM         | Maternal substance abuse | Socioeconomic status | Other factors                                                                                                                                                                                                                                                                                                                            |
|-----------------------|----------|--------------------|----------------------------------|------|---------------|--------------------------|----------------------|------------------------------------------------------------------------------------------------------------------------------------------------------------------------------------------------------------------------------------------------------------------------------------------------------------------------------------------|
|                       |          |                    |                                  |      |               |                          |                      | <b>Adj:</b> Maternal age (as a continuous variable), week of gestation at birth, parity, pregestational diabetes, hypertensive complications, gestational diabetes, mode of delivery, induction of labour infant sex, birthweight <10 <sup>th</sup> percentile, 5 min Apgar score <7, need for resuscitation at birth, admission to NICU |
| <b>Total studies:</b> |          | <b>E: 1</b>        | <b>Adj: 1</b>                    | None | <b>Adj: 1</b> | None                     | <b>Adj: 1</b>        |                                                                                                                                                                                                                                                                                                                                          |

| Study, Year<br>(Country)                                                       | Outcomes                                                                                                                                                   | Multiple<br>gestation | Preeclampsia/<br>severe<br>hypertension | IUGR | PPROM | Fetal<br>anomalies | Maternal<br>smoking/<br>substance<br>abuse | Other factors |
|--------------------------------------------------------------------------------|------------------------------------------------------------------------------------------------------------------------------------------------------------|-----------------------|-----------------------------------------|------|-------|--------------------|--------------------------------------------|---------------|
| <b>Proportion outcomes <sup>c</sup></b>                                        |                                                                                                                                                            |                       |                                         |      |       |                    |                                            |               |
| <b>Population-based studies – Infants born at term</b>                         |                                                                                                                                                            |                       |                                         |      |       |                    |                                            |               |
| Raikkonen,<br>2020 (Finland) <sup>6</sup>                                      | <ul style="list-style-type: none"> <li>Proportion of infants born at term after exposure to ACS</li> </ul>                                                 | <b>E</b>              |                                         |      |       |                    |                                            |               |
| <b>Total studies:</b>                                                          |                                                                                                                                                            | <b>E: 1</b>           | None                                    | None | None  | None               | None                                       |               |
| <b>Population-based studies – Infants born late preterm</b>                    |                                                                                                                                                            |                       |                                         |      |       |                    |                                            |               |
| Malloy, 2012<br>(USA) <sup>8</sup>                                             | <ul style="list-style-type: none"> <li>Proportion of infants born late preterm after exposure to ACS</li> </ul>                                            |                       |                                         |      |       |                    |                                            |               |
| <b>Total studies:</b>                                                          |                                                                                                                                                            | None                  | None                                    | None | None  | None               | None                                       |               |
| <b>Population-based studies – Infants born at term/late preterm (combined)</b> |                                                                                                                                                            |                       |                                         |      |       |                    |                                            |               |
| Razaz, 2015<br>(Canada) <sup>10</sup>                                          | <ul style="list-style-type: none"> <li>Proportion of infants born at term/late preterm (combined) after exposure to ACS</li> <li>(≥35 weeks GA)</li> </ul> |                       |                                         |      |       |                    |                                            |               |
| <b>Total studies:</b>                                                          |                                                                                                                                                            | None                  | None                                    | None | None  | None               | None                                       |               |

| Study, Year (Country)                                              | Outcomes                                                                                                        | Multiple gestation | Preeclampsia/severe hypertension | IUGR | PPROM | Fetal anomalies                            | Maternal smoking/substance abuse | Other factors                                                  |
|--------------------------------------------------------------------|-----------------------------------------------------------------------------------------------------------------|--------------------|----------------------------------|------|-------|--------------------------------------------|----------------------------------|----------------------------------------------------------------|
| <b>RCTs – Infants born at term</b>                                 |                                                                                                                 |                    |                                  |      |       |                                            |                                  |                                                                |
| Schmitz, 2022 (France) <sup>11</sup>                               | <ul style="list-style-type: none"> <li>Proportion of infants born at term after exposure to ACS</li> </ul>      | <b>E</b>           |                                  |      |       | <b>E</b>                                   |                                  |                                                                |
| WHO ACTION Trial Collaborators, 2020 (International) <sup>12</sup> | <ul style="list-style-type: none"> <li>Proportion of infants born at term after exposure to ACS</li> </ul>      |                    |                                  |      |       | <b>E: Major congenital fetal anomalies</b> |                                  |                                                                |
| Crowther, 2006 (Australia and New Zealand) <sup>13</sup>           | <ul style="list-style-type: none"> <li>Proportion of infants born at term after exposure to ACS</li> </ul>      |                    |                                  |      |       |                                            |                                  | <b>E: Chorioamnionitis needing urgent delivery</b>             |
| Danesh, 2012 (Iran) <sup>14</sup>                                  | <ul style="list-style-type: none"> <li>Proportion of infants born at term after exposure to ACS</li> </ul>      | <b>E</b>           |                                  |      |       | <b>E</b>                                   |                                  | <b>E: Placenta previa, placental abruption, fetal distress</b> |
| <b>Total studies:</b>                                              |                                                                                                                 | <b>E: 2</b>        | None                             | None | None  | <b>E: 3</b>                                | None                             |                                                                |
| <b>RCTs – Infants born late preterm</b>                            |                                                                                                                 |                    |                                  |      |       |                                            |                                  |                                                                |
| Schmitz, 2022 (France) <sup>11</sup>                               | <ul style="list-style-type: none"> <li>Proportion of infants born late preterm after exposure to ACS</li> </ul> | <b>E</b>           |                                  |      |       | <b>E</b>                                   |                                  |                                                                |

| Study, Year (Country)                                      | Outcomes                                                                                                                           | Multiple gestation | Preeclampsia/severe hypertension | IUGR | PPROM    | Fetal anomalies | Maternal smoking/substance abuse | Other factors                                                    |
|------------------------------------------------------------|------------------------------------------------------------------------------------------------------------------------------------|--------------------|----------------------------------|------|----------|-----------------|----------------------------------|------------------------------------------------------------------|
| Crowther, 2006 (Australia and New Zealand) <sup>13</sup>   | <ul style="list-style-type: none"> <li>Proportion of infants born late preterm after exposure to ACS</li> </ul>                    |                    |                                  |      |          |                 |                                  | <b>E:</b> Chorioamnionitis needing urgent delivery               |
| Peltoniemi, 2007 (Finland) <sup>15</sup>                   | <ul style="list-style-type: none"> <li>Proportion of infants born late preterm after exposure to ACS</li> </ul>                    |                    |                                  |      |          |                 |                                  | <b>E:</b> Clinical chorioamnionitis, lethal disease of the fetus |
| <b>Total studies:</b>                                      |                                                                                                                                    | <b>E: 1</b>        | None                             | None | None     | <b>E: 1</b>     | None                             |                                                                  |
| <b>RCTs – Infants born at term/late preterm (combined)</b> |                                                                                                                                    |                    |                                  |      |          |                 |                                  |                                                                  |
| Schmitz, 2022 (France) <sup>11</sup>                       | <ul style="list-style-type: none"> <li>Proportion of infants born at term/late preterm (combined) after exposure to ACS</li> </ul> | <b>E</b>           |                                  |      |          | <b>E</b>        |                                  |                                                                  |
| McEvoy, 2010 (U.S.A) <sup>16</sup>                         | <ul style="list-style-type: none"> <li>Proportion of infants born at term/late preterm (combined) after exposure to ACS</li> </ul> | <b>E:</b> > twins  |                                  |      |          | <b>E</b>        |                                  | <b>E:</b> Clinical chorioamnionitis                              |
| Garite, 2009 (U.S.A) <sup>17</sup>                         | <ul style="list-style-type: none"> <li>Proportion of infants born at term/late preterm (combined) after exposure to ACS</li> </ul> |                    |                                  |      | <b>E</b> | <b>E</b>        |                                  |                                                                  |

| Study, Year (Country)                                    | Outcomes                                                                                                                           | Multiple gestation | Preeclampsia/severe hypertension | IUGR | PPROM       | Fetal anomalies | Maternal smoking/substance abuse | Other factors                                         |
|----------------------------------------------------------|------------------------------------------------------------------------------------------------------------------------------------|--------------------|----------------------------------|------|-------------|-----------------|----------------------------------|-------------------------------------------------------|
| Crowther, 2006 (Australia and New Zealand) <sup>13</sup> | <ul style="list-style-type: none"> <li>Proportion of infants born at term/late preterm (combined) after exposure to ACS</li> </ul> |                    |                                  |      |             |                 |                                  | <b>E:</b><br>Chorioamnionitis needing urgent delivery |
| <b>Total studies:</b>                                    |                                                                                                                                    | <b>E: 2</b>        | None                             | None | <b>E: 1</b> | <b>E: 3</b>     | None                             |                                                       |

**Legend:**

Adj – adjusted; BMI – body mass index; BP – blood pressure; cm – centimetres; E – excluded; EGA – estimated gestational age; g – grams; GA – gestational age; ICD – International Classification of Diseases; IUGR – intrauterine growth restriction; kg – kilograms; M – matched; min – minutes; NICU – neonatal intensive care unit; PPRM – preterm premature rupture of membrane; RCT – randomized controlled trial; SGA – small for gestational age; TTN – transient tachypnea of the newborn

<sup>a</sup> The important **confounders** or **co-variates** identified *a priori* for short-term outcomes are: **multiple gestation; preeclampsia/hypertension; intrauterine growth restriction; fetal anomalies; preterm premature rupture of membranes.**

<sup>b</sup> The important **confounders** or **co-variates** identified *a priori* for long-term outcomes are: **multiple gestation; preeclampsia/hypertension; intrauterine growth restriction; preterm premature rupture of membranes; maternal substance use; socioeconomic status.**

<sup>c</sup> The important **confounders** or **co-variates** identified *a priori* for proportion outcomes are: **multiple gestation; preeclampsia/hypertension; intrauterine growth restriction; preterm premature rupture of membranes; fetal anomalies; maternal smoking/substance use.**

## eReferences

1. Diguisto C, Arthuis C, Couderchet J, et al. Impact of antenatal corticosteroids on head circumference of full-term newborns: A French multicenter cohort study. *Acta Obstet Gynecol Scand.* 2020;99:1147-1154.
2. McKinzie AH, Yang Z, Teal E, et al. Are newborn outcomes different for term babies who were exposed to antenatal corticosteroids? *Am J Obstet Gynecol.* 2021;225:536.e1-536.e7.
3. Rodriguez A, Wang Y, Ali Khan A, Cartwright R, Gissler M, Järvelin M-R. Antenatal corticosteroid therapy (ACT) and size at birth: A population-based analysis using the Finnish Medical Birth Register. *PLoS Med.* 2019;16:e1002746.
4. Melamed N, Asztalos E, Murphy K, et al. Neurodevelopmental disorders among term infants exposed to antenatal corticosteroids during pregnancy: a population-based study. *BMJ Open.* 2019;9:e031197.
5. Rääkkönen K, Gissler M, Tapiainen T, Kajantie E. Associations between maternal antenatal corticosteroid treatment and psychological developmental and neurosensory disorders in children. *JAMA Netw Open.* 2022;5:e2228518.
6. Rääkkönen K, Gissler M, Kajantie E. Associations between maternal antenatal corticosteroid treatment and mental and behavioral disorders in children. *JAMA.* 2020;323:1924-1933.
7. Osteen SJ, Yang Z, McKinzie AH, et al. Long-term childhood outcomes for babies born at term who were exposed to antenatal corticosteroids. *AM J Obstet Gynecol.* 2022;S0002-9378:00580-4.
8. Malloy M. Antenatal steroid use and neonatal outcome: United States 2007. *J Perinatol.* 2012;32:722-727.
9. Aviram A, Murphy K, McDonald S, et al. Antenatal corticosteroids and neurodevelopmental outcomes in late preterm births. *Arch Dis Child Fetal Neonatal Ed.* 2022;107:250-255.
10. Razaz N, Skoll A, Fahey J, Allen VM, Joseph K. Trends in optimal, suboptimal, and questionably appropriate receipt of antenatal corticosteroid prophylaxis. *Obstet Gynecol.* 2015;125:288-296.
11. Schmitz T, Doret M, Sentilhes LP, Olivier, et al. Neonatal outcomes for women at risk of preterm delivery given half dose versus full dose of antenatal betamethasone: a randomised, multicentre, double-blind, placebo-controlled, non-inferiority trial. *Lancet.* 2022;400:592-604.
12. WHO Action Trials Collaborators. Antenatal dexamethasone for early preterm birth in low-resource countries. *N Engl J Med.* 2020;383:2514-2525.
13. Crowther CA, Haslam RR, Hiller JE, Doyle LW, Robinson JS, Australasian Collaborative Trial of Repeat Doses of Steroids Study Group. Neonatal respiratory distress syndrome after repeat exposure to antenatal corticosteroids: a randomised controlled trial. *Lancet.* 2006;367:1913-1919.
14. Danesh A, Janghorbani M, Khalatbari S. Effects of antenatal corticosteroids on maternal serum indicators of infection in women at risk for preterm delivery: A randomized trial comparing betamethasone and dexamethasone. *J Res Med Sci.* 2012;17:911-917.
15. Peltoniemi OM, Kari MA, Tammela O, et al. Randomized trial of a single repeat dose of prenatal betamethasone treatment in imminent preterm birth. *Pediatr.* 2007;119:290-298.
16. McEvoy C, Schilling D, Peters D, et al. Respiratory compliance in preterm infants after a single rescue course of antenatal steroids: a randomized controlled trial. *Am J Obstet Gynecol.* 2010;202:544.e1-544.e9.
17. Garite TJ, Kurtzman J, Maurel K, Clark R. Impact of a 'rescue course' of antenatal corticosteroids: a multicenter randomized placebo-controlled trial. *Am J Obstet Gynecol.* 2009;200:248.e1-248.e9.
